# Supplementary material for: Effects of Mixing Volatile Fatty Acids as Carbon Sources on Rhodospirillum rubrum Carbon Metabolism and Redox Balance Mechanisms
Source: Microorganisms. 2021 Sep 21;9(9):1996. doi: 10.3390/microorganisms9091996 (PMC8471276; doi:10.3390/microorganisms9091996)
Supplement: Supplementary file 1 [file microorganisms-09-01996-s001.zip › Supplementary data Table S1 Table S2.xlsx]

## Sheet: Figure S1
Effects of Mixing Volatile Fatty Acids as Carbon Sources on Rhodospirillum rubrum Carbon Metabolism and Redox
Balance Mechanisms
Paloma Cabecas Segura 1, Quentin De Meur 1, Audrey Tanghe 2, Rob Onderwater 2, Laurent Dewasme 3,
Ruddy Wattiez 1 and Baptiste Leroy 1,*
1Laboratory of Proteomics and Microbiology, University of Mons, 7000 Mons, Belgium; paloma.cabecassegura@umons.ac.be (P.C.S.); q.demeur@gmail.com (Q.D.M.); ruddy.wattiez@umons.ac.be (R.W)
2Materia Nova ASBL, Parc Initialis, Avenue Copernic 3, 7000 Mons, Belgium; Audrey.Tanghe@MATERIANOVA.BE (A.T.); Rob.Onderwater@MATERIANOVA.BE (R.O.)
3Systems, Estimation, Control and Optimization Group, University of Mons, 7000 Mons, Belgium; laurent.dewasme@umons.ac.be
*Correspondence: baptiste.leroy@umons.ac.be; Tel.: +32-65-372271
Figure S1 : Monitoring of the growth(●) and butyrate (●) and propionate (●) consumption in a culture of Rs. rubrum S1H cultivated in propionate (A), butyrate (B) or a mixture of both (C). The growth (opened markers; n=5) of culture realized with a mixture of VFAs was monitored by OD680nm. The red arrows correspond to sample taken for proteomic analysis.

## Sheet: Table S1
Table S1 : Full data set of the proteomic analysis carried out on Rs. rubrum
1	This fold change is the ratio of abundance of a protein under propionate condition to the abundanceduring the propionate assimilation phase in mixture condition,
2	the p-value was calcultated using a paired t-test.
3	The fold change corresponds to the ratio of the abundance of a protein during the assimilation phase of butyrate and its abundance during the butyrate assimilation phase in mixture condition.
4	This fold change is the ratio of abundance of a protein under butyrate condition to the abundance under propionate condition.
5	The fold change corresponds to the ratio of the abundance of a protein during the assimilation phase of butyrate and its abundance during the propionate assimilation phase in mixture condition.
6	‘No. identified peptides’ represents the number of identified peptides with a confidence higher than 95%
7	Non identified in this data set
Uniprot accession number	Locus tag	P-value2	Fold change (Propionate/ Mix Propionate) 1	P-value	Fold change (Butyrate/ Mix Butyrate)3	P-value	Fold change (Butyrate/ Propionate)4	P-value	Fold change (Mix butyrate/ Mix propionate) 5	No. of identified peptides6	Description
Q2RYI9	Rru_A0001	0.0105084	3.43661	0.553755	1.3609	0.18718	0.66075	0.512699	1.70604	1	Chromosomal replication initiatoL9:L1890r protein DnaA
Q2RYI8	Rru_A0002	6.78919e-05	3.03612	0.00738304	1.5518	0.00914751	0.61842	0.0675016	1.24982	5	DNA polymerase III subunit beta
Q2RYI7	Rru_A0003	0.00376712	3.47998	0.13646	2.60768	0.0380984	0.560108	0.463681	1.45322	2	DNA replication and repair protein RecF
Q2RYI6	Rru_A0004	0.177947	0.801802	0.542232	0.805591	0.427648	1.36258	0.248501	1.49615	6	DNA gyrase subunit B
Q2RYI1	Rru_A0009	0.0654045	10.8751	0.0187461	8.23744	0.403258	1.70391	0.400248	2.16976	1	PTS IIA-like nitrogen-regulatory protein PtsN
Q2RYI0	Rru_A0010	0.117557	2.22433	0.040569	2.59722	0.325971	0.671524	0.936788	1.03813	2	RNA polymerase sigma-54 factor
Q2RYH9	Rru_A0011	0.643035	1.67376	0.667369	1.30298	0.2117	0.699091	0.891015	0.977593	2	ABC transporter component
Q2RYH8	Rru_A0012	0.0123591	0.174751	0.166783	0.344385	0.965544	1.02283	0.427582	0.742032	1	Uncharacterized protein
Q2RYH7	Rru_A0013	#N/A7	#N/A	#N/A	#N/A	0.205847	0.173768	#N/A	#N/A	0	Uncharacterized protein
Q2RYH6	Rru_A0014	0.387097	1.1789	0.802807	0.917546	0.341808	0.647784	0.139339	1.61727	3	KpsF/GutQ
Q2RYH5	Rru_A0015	6.7849e-05	3.96138	0.0283006	2.6319	0.00188331	0.499679	0.277483	0.673245	5	3'-5' exonuclease
Q2RYH4	Rru_A0016	0.000706816	2.33713	0.00236229	1.67575	0.0590516	0.79554	0.0559527	1.12864	6	3-beta-hydroxy-delta(5)-steroid dehydrogenase
Q2RYH2	Rru_A0018	0.00799903	0.793134	0.00443431	0.492814	0.434821	0.92016	0.0281921	1.31496	5	Glutamate synthase (NADPH) small subunit
Q2RYH1	Rru_A0019	0.00041355	3.69007	0.0278434	2.06584	0.875199	0.971525	0.0357507	1.73804	6	Glutamate synthase (NADPH) large subunit
Q2RYH0	Rru_A0020	0.497493	0.841173	0.0442665	0.763822	0.0341388	1.3419	0.737227	1.07225	4	Glutathione peroxidase
Q2RYG9	Rru_A0021	1.79055e-05	10.3705	0.000529039	5.02044	0.295191	0.879781	0.0956106	1.77862	1	Transcriptional regulator, MarR family
Q2RYG6	Rru_A0024	0.0885348	1.13312	0.000669628	1.44636	0.00624088	1.32946	0.174955	1.06568	6	Peptidase
Q2RYG4	Rru_A0026	0.0527012	0.549995	0.0416007	0.366081	0.290421	0.733587	0.20665	1.37485	4	Uncharacterized protein
Q2RYF8	Rru_A0032	0.0233548	1.51247	0.0357723	2.31874	0.187362	0.909813	0.141881	0.609428	4	TPR repeat
Q2RYF7	Rru_A0033	0.0394078	1.47258	0.174573	0.656258	0.0359921	0.654535	0.103348	1.67491	3	Cytochrome C biogenesis protein
Q2RYF6	Rru_A0034	0.271977	1.2329	0.0269506	0.520516	0.251151	0.718063	0.0994009	1.46384	2	Periplasmic protein thiol-disulfide oxidoreductase DsbE
Q2RYF5	Rru_A0035	#N/A	#N/A	#N/A	#N/A	0.487986	1.15406	#N/A	#N/A	0	Cytochrome c-type biogenesis protein CcmF
Q2RYF0	Rru_A0040	0.0200327	1.78063	0.455727	1.27184	0.231601	0.846971	0.568603	1.2648	2	Cytochrome c biogenesis ATP-binding export protein CcmA
Q2RYE9	Rru_A0041	0.000728774	0.52774	0.0271575	0.502988	0.0353358	2.04295	0.0457978	1.84599	3	Cytochrome c, class II
Q2RYE7	Rru_A0043	0.000389429	2.10667	0.00662188	2.01963	0.76674	1.02953	0.178826	1.27604	5	UDP-3-O-acylglucosamine N-acyltransferase
Q2RYE5	Rru_A0045	0.224076	1.31292	0.0151893	1.84671	0.108937	0.574986	0.573986	1.12771	4	3-oxoacyl-[acyl-carrier-protein] synthase II
Q2RYE4	Rru_A0046	0.0915816	0.839975	0.0555184	1.53186	0.346419	1.22979	0.0596289	0.660977	2	Uncharacterized protein
Q2RYE1	Rru_A0049	0.0172346	4.46938	0.0238565	2.83268	0.102028	0.481141	0.66998	0.88857	3	Biotin/lipoyl attachment
Q2RYE0	Rru_A0050	0.228863	1.31714	0.5844	0.901101	0.115513	0.6235	0	0	1	Uncharacterized protein
Q2RYD9	Rru_A0051	0.00627713	7.51573	0.0011144	3.26637	0.112883	0.667093	0.072655	1.54173	4	Carboxyl transferase
Q2RYD8	Rru_A0052	6.13009e-05	2.92649	0.0710308	1.20967	0.0340556	0.632813	0.00949657	1.80851	5	Biotin carboxylase
Q2RYD7	Rru_A0053	7.38677e-07	3.24489	0.0481058	1.53165	0.0870026	0.827667	0.0494596	1.811	6	Carboxyl transferase
Q2RYD5	Rru_A0055	0.00525363	2.45796	0.00589523	4.17417	0.558018	0.933038	0.00635012	0.582299	6	VacJ-like lipoprotein
Q2RYD4	Rru_A0056	0.879318	1.11758	0.126441	2.01547	0.09135	1.37332	0.932348	0.931514	1	Toluene tolerance
Q2RYD3	Rru_A0057	0.00200896	2.45292	0.217588	1.69045	0.0891724	0.471651	0.221941	1.68997	4	Uncharacterized protein
Q2RYD2	Rru_A0058	0.000842546	1.90432	0.157752	0.814071	0.0213094	0.450545	0.172531	1.19612	4	Dihydrokaempferol 4-reductase
Q2RYD1	Rru_A0059	0.00159124	0.392195	0.000151816	0.448631	0.839746	0.96678	0.730558	0.991556	4	4-hydroxy-3-methylbut-2-enyl diphosphate reductase
Q2RYD0	Rru_A0060	0.000425802	1.75675	0.93956	0.982346	0.0318326	0.468083	0.449165	1.08507	5	Radical SAM
Q2RYC9	Rru_A0061	0.0144713	4.15856	0.00956184	2.35052	0.294087	0.802828	0.39675	1.25789	3	Purine and other phosphorylases, family 1
Q2RYC8	Rru_A0062	0.165945	0.499407	0.483411	1.07208	0.00812832	4.18733	0.0269789	2.01849	5	Terpene synthase, squalene cyclase
Q2RYC7	Rru_A0063	#N/A	#N/A	#N/A	#N/A	0.254059	0.520584	#N/A	#N/A	0	Amine oxidase
Q2RYC6	Rru_A0064	0.00278176	1.98494	0.892078	1.03194	0.41473	0.894368	0.114838	1.56681	2	Squalene-phytoene synthase
Q2RYC5	Rru_A0065	0.544892	1.16607	0.5051	1.12038	0.130518	0.818574	0.800115	0.932679	2	Squalene/phytoene synthase
Q2RYC1	Rru_A0069	0.0466161	1.64163	0.232948	0.799956	0.0254202	0.43322	0.0230237	1.42774	5	ABC transporter component
Q2RYB8	Rru_A0072	4.70692e-05	1.28689	0.355231	0.883605	0.343142	0.892519	0.0782363	1.31976	6	Chaperone protein HtpG
Q2RYB7	Rru_A0073	0.0026891	0.0187429	0.017797	0.0176319	0.499227	1.10291	0.146836	0.747439	3	Ribosomal subunit interface protein, putative
Q2RYB6	Rru_A0074	0.00229099	3.19566	0.0640468	2.23688	0.101458	0.690696	0.514157	0.950839	6	Helicase-like
Q2RYB1	Rru_A0079	0.292962	1.20088	0.233689	1.84915	0.089047	0.479475	0.776341	0.864599	1	Transcriptional regulator, CarD family
Q2RYB0	Rru_A0080	0.0441214	2.91408	0.0502718	2.52261	0.548375	0.913123	0.232403	1.25309	2	Chemotaxis sensory transducer
Q2RYA6	Rru_A0084	0.000607264	3.0691	0.0217495	2.60146	0.755507	0.932562	0.943076	0.969388	2	Proline iminopeptidase
Q2RYA2	Rru_A0088	0.00192281	1.55279	0.157078	1.21419	0.854666	1.01858	0.0439441	1.27584	4	Zinc-containing alcohol dehydrogenase superfamily
Q2RY98	Rru_A0092	0.469043	1.17695	0.160449	2.84094	0.200259	2.38355	0.200914	0.811766	6	Extracellular solute-binding protein, family 1
Q2RY95	Rru_A0095	0.417118	1.86993	0.637939	1.3233	0.967209	1.01897	0.859225	0.890186	2	ABC transporter component
Q2RY94	Rru_A0096	0.109463	0.924585	0.089189	0.815625	0.00966178	0.548642	0.057242	0.821658	4	Secretion protein HlyD
Q2RY92	Rru_A0098	0.00107258	3.88132	0.0405	1.44853	0.0243271	0.684471	0.0453436	1.9267	5	Cystathionine gamma-synthase
Q2RY91	Rru_A0099	0.00893866	2.76956	0.705699	0.811624	0.903905	0.969118	0.373883	1.94741	1	Serine phosphatase
Q2RY90	Rru_A0100	0.0655741	0.0761892	0.0463136	0.144098	0.586701	1.39145	0.856448	1.07544	1	Uncharacterized protein
Q2RY89	Rru_A0101	0.771912	1.10613	0.63665	0.776481	0.171896	1.42039	0.533204	1.4366	3	Uncharacterized protein
Q2RY87	Rru_A0103	#N/A	#N/A	#N/A	#N/A	0.79159	1.20213	#N/A	#N/A	0	Protein SlyX homolog
Q2RY86	Rru_A0104	0.042567	5.45873	0.00590645	2.88193	0.0848722	1.56165	0.0892858	1.93432	5	Alpha-2-macroglobulin-like protein
Q2RY77	Rru_A0113	0.0420619	1.45815	0.197682	1.23039	0.625581	1.18644	0.240135	1.19486	6	Type II secretion system protein E
Q2RY70	Rru_A0120	0.184087	0.547934	0.00854193	0.336542	0.596512	1.14417	0.0118506	2.35734	3	Chemotaxis sensory transducer
Q2RY67	Rru_A0123	0.00207983	3.19774	0.475603	0.191401	0.0420774	0.664787	0.427958	11.8586	5	Bifunctional protein HldE
Q2RY59	Rru_A0131	0.000236764	2.07465	0.0373301	1.68691	0.161073	0.809951	0.604187	1.05543	3	Uncharacterized protein
Q2RY56	Rru_A0134	0.00353595	3.81206	0.0244313	3.4237	0.00293458	2.03758	0.0133216	1.92389	6	Succinate semialdehyde dehydrogenase
Q2RY55	Rru_A0135	0.000212526	2.85264	0.102577	1.57576	0.749647	1.05406	0.0102427	1.79073	3	Molybdenum ABC transporter ATP-binding protein
Q2RY53	Rru_A0137	0.0396774	4.23197	0.0145217	5.17012	0.208082	1.45563	0.852291	0.927667	2	TRAP transporter solute receptor, TAXI family
Q2RY52	Rru_A0138	0.00025987	4.95508	0.0105381	3.94559	0.169974	0.850941	0.70784	1.05794	5	Leucyl aminopeptidase
Q2RY51	Rru_A0139	0.133258	1.49307	0.396682	0.848359	0.0050401	0.710597	0.430796	1.22776	2	Transcriptional regulator, MarR family
Q2RY48	Rru_A0142	0.00702422	5.46008	0.000612795	6.67666	0.0489713	0.840996	0.178043	0.679167	5	Putative cyclase
Q2RY46	Rru_A0144	0.0109044	3.75051	0.00575418	2.4798	0.0112059	0.848331	0.291562	0.728968	3	NADH:flavin oxidoreductase/NADH oxidase
Q9RGQ1	Rru_A0146	0.00927073	0.455222	0.0493347	0.649402	0.344913	1.12121	0.10397	0.759978	6	Inorganicpyrophosphatase
Q2RY42	Rru_A0148	0.00533516	0.704249	0.362296	0.729764	0.00444359	0.440332	0.0442376	0.657083	6	GTP-binding protein TypA
Q2RY41	Rru_A0149	0.0280741	2.41788	0.113077	2.45029	0.094749	1.35019	0.839736	1.09954	3	PfkB
Q2RY39	Rru_A0151	0.0120614	1.73932	0.137214	0.755595	0.0191275	0.626862	0.0522456	1.27621	6	Uncharacterized protein
Q2RY36	Rru_A0154	0.0890127	2.30331	0.822498	1.04565	0.0496948	0.749082	0.332627	1.30895	3	4-hydroxy-tetrahydrodipicolinate reductase
Q2RY35	Rru_A0155	8.44761e-05	3.00181	0.0230772	2.73612	0.66294	0.926073	0.806481	0.968722	2	Transcriptional regulator, TetR family
Q2RY32	Rru_A0158	0.843943	1.066	0.238118	1.64573	0.0320275	0.599494	0.326489	0.645207	4	Methyl-accepting chemotaxis sensory transducer
Q2RY31	Rru_A0159	0.00587057	2.48094	0.401886	1.45237	0.0102527	0.503453	0.76755	0.870487	1	Exodeoxyribonuclease 7 large subunit
Q2RY29	Rru_A0161	0.0573778	0.00217785	0.0656629	0.00132611	0.790763	0.852978	0.326138	1.60823	2	10 kDa chaperonin
Q2RY28	Rru_A0162	0.455931	1.17096	0.36628	1.67948	0.546909	1.364	0.651105	0.909399	6	60 kDa chaperonin 1
Q2RY20	Rru_A0170	1.34384e-05	3.19711	0.000306189	2.51178	0.0113451	2.05243	0.00490066	2.85005	1	CRISPR-associated protein, CT1974
Q2RY18	Rru_A0172	0.00758339	1.74498	0.00189458	2.77642	0.000638283	2.44692	0.00584024	1.38929	6	CRISPR-associated protein, Cse4 family
Q2RY17	Rru_A0173	0.00693961	3.0334	0.0471833	3.28441	0.117755	1.84839	0.0990535	1.63083	3	CRISPR-associated protein, Cse2 family
Q2RY16	Rru_A0174	0.0285983	3.97379	0.00244265	3.24589	0.793342	1.06893	0.45329	1.29454	3	CRISPR-associated protein, Cse1 family
Q2RY07	Rru_A0183	0.12703	1.85446	0.000363739	5.71855	0.00847698	1.88479	0.229077	0.700348	6	Cold-shock DNA-binding protein family
Q2RY06	Rru_A0184	0.0194855	1.56055	0.0219911	2.56562	0.000800777	2.17825	0.421624	1.06102	4	Uncharacterized protein
Q2RY05	Rru_A0185	0.0997523	1.55565	0.00723974	2.05728	0.000118913	2.17041	0.794482	0.968774	6	Uncharacterized protein
Q2RY04	Rru_A0186	0.000876184	0.455	0.611974	1.28674	0.406303	1.60283	0.397368	0.663836	3	Uncharacterized protein
Q2RXZ6	Rru_A0194	#N/A	#N/A	#N/A	#N/A	0.14866	2.49071	#N/A	#N/A	0	Uncharacterized protein
Q2RXZ5	Rru_A0195	0.1698	2.63947	0.411701	1.36703	0.293092	1.2199	0.189222	3.25061	6	Uncharacterized protein
Q2RXY4	Rru_A0206	0.192669	0.868596	0.492258	0.792532	0.427044	0.87241	0.817723	0.939135	6	Hydrogenobyrinic acid a,c-diamide cobaltochelatase
Q2RXY3	Rru_A0207	0.000443591	2.29957	0.0753829	0.732456	0.00442688	0.429348	0.00276957	1.78444	6	Cobalt chelatase, CobT subunit
Q2RXY2	Rru_A0208	0.00223148	3.94008	0.00749037	2.80312	0.697551	0.968314	0.599903	1.1816	4	SNF2 helicase-related protein
Q2RXY0	Rru_A0210	0.031975	5.38062	0.0854994	5.2316	0.457663	0.7196	0.852736	0.866147	2	50S ribosomal protein L28
Q2RXX9	Rru_A0211	0.104797	2.61095	0.205974	2.48822	0.823599	1.14724	0.76685	0.915248	1	Uncharacterized protein
Q2RXX7	Rru_A0213	0.000148155	1.95334	0.770571	0.978885	0.00159212	0.541386	0.0815306	1.13998	5	Uncharacterized protein
Q2RXX6	Rru_A0214	0.026636	1.33773	0.841899	1.07802	0.286384	0.810144	0.809439	0.914918	1	MutT/nudix family protein
Q2RXX3	Rru_A0217	0.0498162	0.353381	0.952941	1.02505	0.013785	1.96636	0.445908	0.716002	6	Citrate lyase
Q2RXX2	Rru_A0218	7.84756e-05	0.159974	0.00663291	0.0932554	0.352075	0.563115	0.533124	1.07495	1	Acetyl-coenzyme A carboxylase carboxyl transferase subunit alpha
Q2RXX1	Rru_A0219	#N/A	#N/A	#N/A	#N/A	0.190505	1.26248	#N/A	#N/A	0	Uncharacterized protein
Q2RXW9	Rru_A0221	0.00547664	0.64637	0.103226	0.813921	0.0340071	1.49608	0.231622	1.09101	5	Phosphoglycerate kinase
Q2RXW8	Rru_A0222	0.0831904	0.843588	0.448077	0.831738	0.0277719	1.5965	0.18493	1.53229	6	Glyceraldehyde-3-phosphate dehydrogenase
Q2RXW7	Rru_A0223	0.0541676	5.42231	0.0865935	5.41676	0.519328	0.865721	0.861722	1.11365	1	Polyphosphate:AMP phosphotransferase
Q2RXW1	Rru_A0229	0.142916	1.96734	0.35972	1.56908	0.0178334	0.462006	0.843937	0.907271	1	Glycosyl transferase, group 1
Q2RXW0	Rru_A0230	0.00118176	5.01743	0.625573	1.44887	0.333058	1.34848	0.525578	1.7488	1	Asparagine synthetase
Q2RXV7	Rru_A0233	0.340359	0.453655	0.320873	0.579531	0.0822433	1.70914	0.727167	1.21158	2	Uncharacterized protein
Q2RXV5	Rru_A0235	0.00631859	2.48955	0.000258894	1.75526	0.363894	0.870693	0.00223039	1.27533	6	Protein translocase subunit SecA
Q2RXV3	Rru_A0237	0.0374478	1.98816	0.0275993	4.57066	0.269365	1.32487	0.0381955	0.577086	1	Uncharacterized protein
Q2RXU9	Rru_A0241	5.59849e-05	2.94836	0.000885284	1.89923	0.298689	1.26133	0.00763372	1.86392	6	DNA methylase N-4/N-6
Q2RXU8	Rru_A0242	0.0343973	1.57936	0.369317	1.99341	0.383729	1.09203	0.00771061	1.93826	3	Type III restriction enzyme, res subunit
Q2RXU7	Rru_A0243	0.923454	0.992366	0.000777358	0.359522	0.0266497	0.707028	0.00226108	1.91991	6	tRNA/rRNA cytosine-C5-methylase
Q2RXU6	Rru_A0244	0.0332847	1.11674	0.130305	0.794491	0.00940393	0.470389	0.0543561	0.772099	6	Inosine-5'-monophosphate dehydrogenase
Q2RXU5	Rru_A0245	0.0089508	1.94162	0.373805	0.728197	0.145691	0.498845	0.165175	1.53641	2	Ribosomal RNA large subunit methyltransferase E
Q2RXU3	Rru_A0247	0.00154949	0.49234	0.776812	1.06518	0.0586551	1.37755	0.0224273	0.574963	6	Periplasmic binding protein/LacI transcriptional regulator
Q2RXT8	Rru_A0252	0.000868197	2.28945	0.0229113	2.40574	0.069316	0.77356	0.207829	0.709882	5	Zinc-containing alcohol dehydrogenase superfamily
Q2RXT7	Rru_A0253	0.0284932	0.672264	0.00375615	0.558632	0.474641	0.855324	0.2586	1.08505	3	GDP-mannose 4,6-dehydratase
Q2RXT6	Rru_A0254	0.259867	0.801025	0.419356	1.36772	0.202772	1.25745	0.250125	0.631262	2	NAD-dependent epimerase/dehydratase
Q2RXT1	Rru_A0259	0.00135074	6.26566	0.002514	7.5543	0.822078	0.946868	0.593436	0.767636	1	Carbon starvation protein CstA
Q2RXS9	Rru_A0261	0.292857	1.82708	0.193559	1.4729	0.0776038	4.11709	0.0453678	3.55245	1	Uncharacterized protein
Q2RXS7	Rru_A0263	0.0804771	0.623578	0.23434	0.741166	0.228822	1.2511	0.965895	0.990722	4	4-diphosphocytidyl-2-C-methyl-D-erythritol kinase
Q2RXS6	Rru_A0264	0.00125012	0.415666	0.966906	0.994432	0.270828	1.26718	0.00835464	0.52691	3	TPR repeat
Q2RXS5	Rru_A0265	0.347647	1.13993	0.647673	0.912072	0.0888353	1.45877	0.145162	1.53112	5	Electron-transferring-flavoprotein dehydrogenase
Q2RXS2	Rru_A0268	0.00134712	0.477009	0.00958087	0.489576	0.0842184	0.516822	0.00105513	0.538327	3	Molybdopterin binding domain
Q2RXS0	Rru_A0270	#N/A	#N/A	#N/A	#N/A	0.717819	0.814009	#N/A	#N/A	0	ProteinApaG
Q2RXR9	Rru_A0271	0.0234552	1.2823	0.176995	0.819279	0.0592446	0.82163	0.099707	1.31104	6	GTP cyclohydrolase 1
Q2RXR7	Rru_A0273	0.000120655	0.334515	0.000360648	0.265571	0.100017	0.556406	0.00771561	0.742711	5	3-oxoacyl-[acyl-carrier-protein] reductase
Q2RXR6	Rru_A0274	0.0322476	0.624123	0.294148	1.09994	0.0214115	1.33752	0.144786	0.78934	6	Acetyl-CoA acetyltransferase
Q2RXR4	Rru_A0276	0.00117362	2.22876	0.00160624	2.29613	0.0708809	1.26965	0.00485891	1.31215	5	Polyhydroxyalkanoate synthesis repressor PhaR
Q2RXR2	Rru_A0278	0.981485	1.00885	0.0185061	8.01326	0.403196	0.589144	0.0854017	0.287652	1	Transcriptional regulator, XRE family
Q2RXR0	Rru_A0280	0.666919	1.03507	0.977093	0.995764	0.0880266	0.728549	0.00774653	0.663508	4	Queuine tRNA-ribosyltransferase
Q2RXQ9	Rru_A0281	0.291442	1.25606	0.0483172	2.3961	0.026735	0.623055	0.0102654	0.544917	6	S-adenosylmethionine:tRNA ribosyltransferase-isomerase
Q2RXQ7	Rru_A0283	0.00202467	4.85838	0.192624	2.42154	0.890873	0.969401	0.0016174	2.3756	1	Uncharacterized protein
Q2RXQ6	Rru_A0284	0.000119449	0.416551	0.458764	0.72186	0.5658	1.1233	0.529851	0.954649	5	Acetolactate synthase, large subunit
Q2RXQ5	Rru_A0285	0.725197	1.12384	0.821282	1.08392	0.683812	1.06652	0.857235	0.922864	4	Aldehyde dehydrogenase
Q2RXQ4	Rru_A0286	0.288026	1.71756	0.0352097	2.44076	0.0278273	1.68249	0.0920755	1.4513	2	Uncharacterized protein
Q2RXQ3	Rru_A0287	0.00460448	4.90038	0.0980205	1.71126	0.00683238	0.549213	0.719588	1.08592	2	Uncharacterized protein
Q2RXQ2	Rru_A0288	0.95655	1.00682	0.0294435	1.61762	0.0587682	1.86158	0.8696	1.02921	6	2,5-didehydrogluconate reductase
Q2RXQ1	Rru_A0289	0.034808	0.64373	0.424994	1.0975	0.124246	0.707501	0.00843609	0.44488	2	NUDIX hydrolase
Q2RXP9	Rru_A0291	0.501757	1.52727	0.57835	0.57736	0.441647	0.49994	0.590339	1.69384	1	Uncharacterized protein
Q2RXP8	Rru_A0292	0.00587451	0.0944144	0.168453	0.047627	0.58638	1.42444	0.085123	0.438236	1	Integration host factor subunit beta
Q2RXP7	Rru_A0293	0.000296202	5.50723	0.0262824	3.40574	0.0373886	0.614241	0.96842	0.995043	5	30S ribosomal protein S1
Q2RXP6	Rru_A0294	#N/A	#N/A	#N/A	#N/A	#N/A	#N/A	#N/A	#N/A	2	Cytidylate kinase
Q2RXP5	Rru_A0295	1.80203e-05	2.78488	0.00293028	2.17741	0.00115345	0.756339	0.697506	0.94771	5	3-phosphoshikimate 1-carboxyvinyltransferase
Q2RXP4	Rru_A0296	0.000776405	0.180018	0.0153351	0.122714	#N/A	#N/A	0.077762	1.94529	1	Uncharacterized protein
Q2RXP2	Rru_A0298	0.88164	1.0078	0.246316	1.30436	0.816516	0.980596	0.208925	0.745779	6	Aldehyde dehydrogenase (Acceptor)
Q2RXP1	Rru_A0299	2.27398e-05	0.331107	0.0522667	0.44884	0.24605	1.2924	0.617139	0.919285	3	Glutamine amidotransferase class-I
Q2RXP0	Rru_A0300	0.00186214	0.674002	0.00835357	0.499105	0.00800858	0.534766	0.0412929	0.77973	6	Aminotransferase, class IV
Q2RXN9	Rru_A0301	0.0963768	1.93973	0.0926607	0.630945	0.702677	0.888487	0.0151471	2.70666	3	Alkylhydroperoxidase AhpD core
Q2RXN8	Rru_A0302	0.00526671	2.32675	0.268137	1.16926	0.289831	1.19849	0.00238636	2.54623	2	Hydrogenase accessory protein HypB
Q2RXK8	Rru_A0332	0.000725072	2.56542	0.0600893	1.45756	0.367525	1.15343	0.0738458	1.45389	3	Glutathione S-transferase-like
Q2RXK7	Rru_A0333	0.234415	2.90715	0.224872	0.546627	0.508614	0.591642	0.0195268	4.22687	1	Ferritin and Dps
Q2RXK6	Rru_A0334	0.182518	1.5159	0.211336	3.42861	0.762127	1.04806	0.408186	0.725386	4	Transcriptional regulator, LysR family
Q2RXK5	Rru_A0335	0.799861	1.02111	0.0530284	0.498528	0.109815	1.23034	0.0473489	2.07115	6	YbaK/prolyl-tRNA synthetase associated region
Q2RXK1	Rru_A0339	0.0467496	0.606122	0.015497	1.6196	0.00746019	1.85345	0.130299	0.734356	2	Short-chain dehydrogenase/reductase SDR
Q2RXJ7	Rru_A0343	0.248875	0.497711	0.00920292	0.210793	0.936213	1.048	0.054602	2.03816	1	Uncharacterized protein
Q2RXJ6	Rru_A0344	0.0956942	0.879067	0.00174352	1.54632	0.0592401	1.82952	0.219047	1.10766	4	CRISPR-associated protein, Cse4 family
Q2RXJ5	Rru_A0345	0.528598	1.13446	0.0550732	1.79571	0.0550803	1.99631	0.0197992	1.43082	4	CRISPR-associated protein, Cas5e family
Q2RXJ4	Rru_A0346	0.136711	1.49533	0.155155	1.42637	0.00817266	2.09136	0.136301	1.83032	4	CRISPR-associated protein, CT1974 family
Q2RXI5	Rru_A0355	0.708683	0.893659	0.621762	1.22487	0.295367	0.865149	0.236855	0.560276	6	GMP synthase [glutamine-hydrolyzing]
Q2RXI4	Rru_A0356	0.00741534	2.27753	0.00945002	1.85487	0.425126	1.1434	0.0112936	1.36532	6	Isocitrate dehydrogenase [NADP]
Q2RXI3	Rru_A0357	5.51271e-05	0.355538	0.00216006	0.271886	0.913857	0.963213	0.0950634	1.26307	2	Uncharacterized protein
Q2RXI2	Rru_A0358	0.811386	0.935184	0.0627922	0.556658	#N/A	#N/A	0.0133419	1.67535	1	Heme oxygenase
Q2RXI1	Rru_A0359	0.127797	0.1424	0.0632143	0.0897929	0.410119	0.564499	0.640465	0.771652	1	Class II aldolase/adducin-like
Q2RXI0	Rru_A0360	0.00199942	1.60818	0.409704	0.807837	0.176314	0.838947	0.0507768	1.80933	3	Methylthioribose-1-phosphate isomerase
Q2RXH9	Rru_A0361	0.0325665	1.25536	0.535446	0.939398	0.5867	0.942919	0.0208545	1.26149	6	S-methyl-5'-thioadenosine phosphorylase
Q2RXH8	Rru_A0362	0.000708219	2.40631	0.0283313	2.27612	0.451817	1.12995	0.015374	1.42469	5	Cytochrome c1
Q2RXH7	Rru_A0363	0.528438	0.828496	0.601782	0.726321	0.425416	0.61441	0.409871	0.689938	1	Cytochrome b
Q2RXH6	Rru_A0364	0.038798	1.21717	0.148614	0.852	0.450091	0.925215	0.0435848	1.33309	1	Ubiquinol-cytochrome c reductase iron-sulfur subunit
Q2RXH4	Rru_A0366	0.186908	0.427967	0.244851	2.36111	0.39648	1.68164	0.106159	0.236523	2	Polynucleotide adenylyltransferase region
Q2RXH3	Rru_A0367	0.671091	0.790482	0.00904715	2.8636	0.936742	1.07824	0.486187	0.680958	1	NUDIX hydrolase
Q2RXH2	Rru_A0368	0.0353572	1.63488	0.483056	1.09844	0.101394	0.672058	0.756777	0.930494	2	Uncharacterized protein
Q2RXH1	Rru_A0369	0.000117521	8.14957	0.000427277	3.08629	0.0627741	0.817957	0.014512	2.08061	5	ATPase associated with various cellular activities, AAA_3
Q2RXH0	Rru_A0370	0.000188351	3.12774	0.0126057	2.28569	0.0339075	0.77705	0.752098	1.08734	2	Uncharacterized protein
Q2RXG9	Rru_A0371	0.0125828	1.87069	0.427078	0.705588	0.104078	0.741565	0.204559	2.21782	5	Double-transmembrane region-like
Q2RXG8	Rru_A0372	0.0005028	3.99744	0.0319756	2.84712	0.275319	0.83567	0.483692	1.13284	1	Uncharacterized protein
Q2RXG7	Rru_A0373	0.262908	1.51476	0.233076	4.40784	0.523515	1.33266	0.25017	0.51887	1	Flavoprotein WrbA
Q2RXG5	Rru_A0375	0.000726576	2.35598	0.00458776	4.72618	0.00231306	1.7415	0.283591	0.765257	2	Pirin-like
Q2RXG4	Rru_A0376	0.0348023	6.8593	0.0338503	5.40979	0.257892	2.18884	0.590409	1.49362	1	Transcriptional regulator, LytR/AlgR family
Q2RXG2	Rru_A0378	0.243402	0.814128	0.504875	0.857348	0.953201	1.00567	0.31145	1.18627	4	Uncharacterized protein
Q2RXG1	Rru_A0379	0.390756	1.33397	0.510008	1.22903	0.855119	1.11203	0.0288315	0.449179	2	Flavodoxin
Q2RXG0	Rru_A0380	#N/A	#N/A	#N/A	#N/A	0.571573	1.28004	#N/A	#N/A	0	Glyoxalase/bleomycin resistance protein/dioxygenase
Q2RXF6	Rru_A0384	0.0192559	0.578966	0.0978456	0.805132	0.0728255	1.69477	0.0548295	1.26317	5	NADPH-quinone reductase
Q2RXF5	Rru_A0385	0.0125226	0.78557	0.0340373	1.90649	0.0232038	1.90497	0.0402032	0.787863	6	Gamma-glutamyltransferase 1, Threonine peptidase, MEROPS family T03
Q2RXF1	Rru_A0389	0.250866	1.48636	0.528386	0.850092	0.113971	2.13438	0.00390313	3.02377	3	Antibiotic biosynthesis monooxygenase
Q2RXE8	Rru_A0392	0.30139	1.07787	0.166265	0.867249	0.130678	0.808139	0.28704	1.103	5	Molybdopterin binding domain
Q2RXE7	Rru_A0393	0.173026	1.66912	0.275362	1.59076	0.360507	0.882184	0.844043	1.09935	2	NUDIX hydrolase
Q2RXE6	Rru_A0394	6.79821e-05	1.64475	0.0124238	0.749755	0.790219	0.923405	0.00229327	1.35666	4	Arginine biosynthesis bifunctional protein ArgJ
Q2RXE5	Rru_A0395	0.0026559	1.68657	0.061834	0.784934	0.0183057	0.708574	0.00537465	1.75532	3	PpiC-type peptidyl-prolyl cis-trans isomerase
Q2RXE4	Rru_A0396	0.0589035	1.32577	0.62862	1.10611	0.229535	0.768976	0.66017	1.05929	4	Diaminopimelate decarboxylase
Q2RXE3	Rru_A0397	0.0197998	1.98867	0.517783	1.10224	0.0404501	0.614026	0.265547	1.26138	6	Argininosuccinate lyase
Q2RXE2	Rru_A0398	0.102063	4.659	0.0194525	3.73768	0.0389202	2.82479	0.298539	4.1763	1	Thiol-disulfide isomerase and thioredoxins-like
Q2RXD7	Rru_A0403	0.029039	1.69218	0.418777	1.10928	0.0356923	0.684242	0.548509	1.12291	4	Short-chain dehydrogenase/reductase SDR
Q2RXD6	Rru_A0404	0.00251395	0.653701	0.00848366	0.445448	0.0205249	0.751104	0.0643716	1.21775	4	Amidophosphoribosyltransferase
Q2RXD4	Rru_A0406	0.0619538	5.62235	0.443506	2.08421	0.330113	0.807942	0.45857	2.08557	2	DNA repair protein radA
Q2RXD0	Rru_A0410	0.0752472	0.354914	0.656847	1.46924	0.459344	0.626413	0.0335919	0.272619	1	DnaB helicase
Q2RXC9	Rru_A0411	2.86e-05	0.0226634	0.00636888	0.0371261	0.949954	0.976514	0.00251263	0.571433	4	50S ribosomal protein L9
Q2RXC7	Rru_A0413	0.0531331	1.79108	0.110835	0.696127	0.00620226	0.309834	0.896786	0.994454	2	30S ribosomal protein S18
Q2RXC6	Rru_A0414	#N/A	#N/A	#N/A	#N/A	#N/A	#N/A	#N/A	#N/A	4	0S ribosomal protein S6
Q2RXC5	Rru_A0415	0.0512799	1.14526	0.312734	1.07629	0.668922	0.973451	0.429963	1.06146	5	Malonyl CoA-acyl carrier protein transacylase
Q2RXC4	Rru_A0416	0.0725733	1.48176	0.990342	1.00168	0.11188	0.613534	0.893457	0.979494	5	3-oxoacyl-[acyl-carrier-protein] reductase
Q2RXC3	Rru_A0417	1.41209e-05	0.170293	0.0633006	0.209153	0.806269	0.919505	0.37157	0.798572	3	Acyl carrier protein
Q2RXC2	Rru_A0418	0.0308733	1.37056	0.434666	0.937087	0.130732	0.675076	0.757417	1.03225	6	3-oxoacyl-[acyl-carrier-protein] synthase 2
Q2RXC0	Rru_A0420	0.0337219	0.573687	0.76402	0.949146	0.0761949	1.82196	0.892771	1.02335	3	Uncharacterized protein
Q2RXB9	Rru_A0421	0.278787	1.76559	0.1171	5.39056	0.660056	1.25683	0.342497	0.50146	3	Uncharacterized protein
Q2RXB5	Rru_A0425	0.00358884	0.0494395	0.497694	0.620057	#N/A	#N/A	0.00456858	0.304824	1	Uncharacterized protein
Q2RXB4	Rru_A0426	0.0166384	0.259233	0.0621488	0.459769	0.549243	0.726864	0.0636078	0.532922	1	Uncharacterized protein
Q2RXB2	Rru_A0428	0.0771994	1.52471	0.882763	1.09879	0.472387	0.831424	0.726091	1.28893	3	Uncharacterized protein
Q2RXA9	Rru_A0431	0.00219568	3.3072	0.326667	1.67393	0.696165	1.0824	0.393672	2.2024	2	Ribosomal RNA small subunit methyltransferase A
Q2RXA8	Rru_A0432	0.0135681	2.24115	0.0570374	1.54196	0.00870212	1.483	0.00775488	1.90837	3	4-hydroxythreonine-4-phosphate dehydrogenase
Q2RXA7	Rru_A0433	0.011325	1.28886	0.259588	1.37008	0.105491	1.32616	0.757393	1.06865	5	PpiC-type peptidyl-prolyl cis-trans isomerase
Q2RXA5	Rru_A0435	0.0353881	1.20706	0.0417089	2.77681	0.166171	1.43177	0.010993	0.65169	6	Acyl-CoA dehydrogenase
Q2RXA4	Rru_A0436	0.0221419	0.617218	0.0117404	0.528641	0.277407	1.5125	0.0109584	2.53368	5	Uncharacterized protein
Q2RXA3	Rru_A0437	1.21787e-05	0.111359	0.0203784	0.196638	0.64272	0.731743	0.0163819	0.520308	4	OmpA family protein
Q2RXA0	Rru_A0440	0.0102527	0.595445	0.115426	0.496404	0.0510879	0.518032	0.235127	0.747857	5	Xylose isomerase-like TIM barrel
Q2RX98	Rru_A0442	0.862076	0.904745	0.682396	1.15942	0.338827	0.852211	0.622596	0.705701	1	FAD linked oxidase-like
Q2RX96	Rru_A0444	0.00164047	2.76067	0.12373	3.45443	0.572576	1.1554	0.652975	0.820058	4	Translation factor SUA5
Q2RX95	Rru_A0445	7.85051e-05	1.47604	0.244079	1.13437	0.384783	1.28079	0.00692096	1.41686	6	3(2),5-bisphosphate nucleotidase
Q2RX94	Rru_A0446	0.400329	0.76597	0.662997	0.75288	0.0314129	1.76037	0.664966	1.33542	1	Uncharacterized protein
Q2RX93	Rru_A0447	0.479044	1.07442	0.0304825	1.59922	0.0512454	1.55433	0.5874	1.09224	4	AMMECR1
Q2RX92	Rru_A0448	0.591214	1.58463	0.736614	1.23698	0.25123	1.64699	0.180514	3.28861	1	Uncharacterized protein
Q2RX87	Rru_A0453	0.00112542	2.91296	0.0234594	2.89642	0.543318	1.1394	0.845382	1.05745	3	CRISPR-associated endonuclease, Csn1 family
Q2RX86	Rru_A0454	0.00120629	3.84676	0.00888077	1.42748	0.0443823	0.540303	0.00416492	1.51197	6	Probable cytosol aminopeptidase
Q2RX83	Rru_A0457	#N/A	#N/A	#N/A	#N/A	0.713074	0.797178	#N/A	#N/A	0	Uncharacterized protein
Q2RX82	Rru_A0458	0.00210362	6.80411	0.0402968	0.326528	0.0330283	0.230289	0.0191211	5.41817	1	Uncharacterized protein
Q2RX81	Rru_A0459	0.00241095	0.246772	0.735994	1.19609	0.505795	1.37411	0.0118736	0.271111	2	Uncharacterized protein
Q2RX80	Rru_A0460	0.216681	0.80362	0.542393	0.840549	0.127612	0.760232	0.333415	1.15265	2	NADP oxidoreductase, coenzyme F420-dependent
Q2RX79	Rru_A0461	1.03599e-06	8.92664	0.00422348	4.60781	0.129812	1.24879	0.290692	2.41756	1	Transcriptional regulator, LysR family
Q2RX78	Rru_A0462	0.169555	1.19628	0.568787	1.39156	0.0228536	1.76833	0.471666	1.90328	5	Aldehyde dehydrogenase
Q2RX77	Rru_A0463	0.00345074	0.198629	0.0339374	0.11996	0.547251	0.623914	0.313419	1.31575	2	Alanine racemase-like
Q2RX76	Rru_A0464	0.00705491	3.75803	0.000175916	2.72514	0.314605	1.23525	0.0381849	1.64808	6	Uncharacterized protein
Q2RX75	Rru_A0465	0.275607	0.562022	0.32551	0.598049	0.195573	1.15243	0.971181	0.982921	1	Phosphoserine phosphatase
Q2RX73	Rru_A0467	0.0236733	1.85844	0.017289	1.5545	0.369085	1.24716	0.0151272	1.65534	6	Acetolactate synthase, large subunit
Q2RX72	Rru_A0468	6.02517e-07	5.71666	0.00316396	5.40889	0.896101	0.989483	0.729917	1.05297	3	Acetolactate synthase, small subunit
Q2RX71	Rru_A0469	0.145381	1.26205	0.208973	1.16585	0.0627219	1.57691	0.00440212	2.01909	6	Ketol-acid reductoisomerase
Q2RX70	Rru_A0470	0.106076	1.39318	0.0116236	0.737911	0.444855	0.8058	0.00303201	1.51736	6	Rod shape-determining protein MreB
Q2RX66	Rru_A0474	0.0117694	1.58727	0.0339024	1.71504	0.905953	0.97534	0.321448	0.910713	4	Zinc-containing alcohol dehydrogenase superfamily
Q2RX65	Rru_A0475	0.00117919	0.632975	0.0102845	0.620676	0.868536	1.03057	0.0266576	0.806427	6	NADH:flavin oxidoreductase/NADH oxidase
Q2RX64	Rru_A0476	0.0127141	0.625023	0.4411	1.61626	0.365226	1.54712	0.0366908	0.553642	2	OsmC-like protein
Q2RX63	Rru_A0477	0.442307	0.543991	0.192348	1.98329	0.161448	1.46976	0.260508	0.30089	1	Uncharacterized protein
Q2RX61	Rru_A0479	0.577611	0.419489	0.676341	0.597031	#N/A	#N/A	0.62966	0.476374	1	Radical SAM
Q2RX59	Rru_A0481	0.0904356	4.22959	0.0466986	10.3322	0.949894	1.02971	0.253602	0.58539	2	Uncharacterized protein
Q2RX55	Rru_A0485	9.27928e-06	1.98677	0.13492	0.840436	0.0298647	0.721013	5.29218e-05	1.72944	6	Protoporphyrin IX magnesium-chelatase
Q2RX54	Rru_A0486	1.81116e-05	3.09305	0.0855753	1.50115	0.0762667	0.775786	0.0158931	1.60302	5	Protoporphyrin IX magnesium-chelatase
Q2RX53	Rru_A0487	0.000499454	2.46141	0.0177633	1.54884	0.264226	1.11025	0.0564302	1.5774	4	Alpha/beta hydrolase fold
Q2RX52	Rru_A0488	0.521811	0.913761	0.0458148	3.43914	0.185162	1.46036	0.00181759	0.403278	6	TonB-dependent receptor
Q2RX49	Rru_A0491	0.0145993	2.49155	0.856317	1.09655	0.777576	1.10247	0.224899	3.29149	2	ABC transporter component
Q2RX48	Rru_A0492	0.0187181	0.365316	0.703364	0.843409	0.732036	0.877886	0.129997	0.547792	2	Uncharacterized protein
Q2RX47	Rru_A0493	0.99157	0.998239	0.0019762	0.361855	0.163491	0.656234	0.00577425	1.72893	5	Phytoene desaturase
Q2RX44	Rru_A0496	0.328297	0.720266	0.0934517	0.451682	0.139631	0.759723	0.30979	1.39792	3	Cyclic nucleotide-binding domain (CNMP-BD) protein
Q2RX40	Rru_A0500	0.202246	1.11118	0.0621002	0.695411	0.102411	1.36119	8.07785e-05	1.9875	6	Extracellular solute-binding protein, family 1
Q2RX38	Rru_A0503	0.000904688	2.61987	0.159662	1.47588	0.0613725	0.702442	0.290325	1.26205	6	Lysine--tRNA ligase
Q2RX36	Rru_A0505	#N/A	#N/A	#N/A	#N/A	0.341971	0.616444	#N/A	#N/A	0	Glycogen debranching enzyme GlgX
Q2RX33	Rru_A0508	0.299882	2.23462	0.622727	1.37634	0.491433	1.40397	0.933921	1.06815	1	Aminotransferase, class IV
Q2RX28	Rru_A0513	0.000113452	1.50357	0.0412932	1.35862	0.306228	1.17227	0.0465116	1.3529	2	Uncharacterized protein
Q2RX27	Rru_A0514	0.00119739	2.58868	0.373757	1.22673	0.00806679	0.591697	0.38556	1.28603	4	Dihydroorotate dehydrogenase (quinone)
Q2RX26	Rru_A0515	0.02623	0.294886	0.113197	0.150023	0.291907	0.480514	0.532312	1.32966	1	HAD-superfamily subfamily IIA hydrolase
Q2RX21	Rru_A0520	0.384018	0.800571	0.0277358	0.631592	0.244437	0.651707	0.0723647	1.48801	3	Uncharacterized protein
Q2RX20	Rru_A0521	0.000307539	5.06065	0.0357868	2.2224	0.353252	0.843512	0.183213	1.8921	6	CheA Signal Transduction Histidine Kinases (STHK)
Q2RX19	Rru_A0522	0.18129	0.38496	0.282388	0.215867	0.929336	1.02672	0.648321	1.43061	3	Response regulator receiver domain protein (CheY)
Q2RX18	Rru_A0523	0.547519	1.2104	0.232709	0.756122	0.79278	1.06478	0.138992	1.57171	3	Chemotaxis response regulator protein-glutamate methylesterase 1
Q2RX17	Rru_A0524	0.00377955	3.47267	0.000901021	2.7903	0.13537	1.32296	0.0180469	1.75265	4	MCP methyltransferase, CheR-type
Q2RX16	Rru_A0525	0.0627636	0.694002	0.0298194	0.403605	0.876279	0.946999	0.00333581	1.61846	5	Two component transcriptional regulator, winged helix family
Q2RX12	Rru_A0529	0.0809299	9.6755	0.0275289	8.15555	0.902115	0.973226	0.298166	1.50235	1	Uncharacterized protein
Q2RX09	Rru_A0532	0.364153	0.779212	0.0168608	0.336848	0.301966	1.28133	0.0465021	1.7401	2	Site-determining protein
Q2RX01	Rru_A0540	0.256748	0.600242	0.432734	0.829329	0.488877	0.825449	0.38957	0.701959	3	Two component, sigma54 specific, transcriptional regulator, Fis family
Q2RX00	Rru_A0541	0.0945045	6.0817	0.0920633	4.13563	0.268381	0.635267	0.691034	1.2484	1	MotA/TolQ/ExbB proton channel
Q2RWZ9	Rru_A0542	0.455498	0.716503	0.0926489	0.513003	0.081527	1.85234	0.732006	1.08844	2	Surface presentation of antigens (SPOA) protein
Q2RWZ7	Rru_A0544	0.299405	0.30368	0.896113	0.924716	0.248756	1.62806	0.363073	0.391185	1	Flagellar motor switch protein FliG
Q2RWZ6	Rru_A0545	0.610825	0.672833	0.450886	0.638985	0.665321	1.40947	0.85834	1.10653	1	Flagellar M-ring protein
Q2RWZ5	Rru_A0546	#N/A	#N/A	#N/A	#N/A	0.922827	0.956272	#N/A	#N/A	0	Uncharacterized protein
Q2RWZ3	Rru_A0548	0.192401	0.446691	0.0398852	0.606793	0.170394	0.546677	0.453966	0.713774	5	Flagellar hook-length control protein
Q2RWY8	Rru_A0553	0.717201	0.889866	0.0270608	4.46381	0.401101	1.28302	0.0345777	0.224028	1	Response Regulator Receiver Signal Transduction Histidine Kinase
Q2RWY6	Rru_A0555	0.00485216	0.454051	0.92326	0.989598	0.00250697	1.19803	0.00432862	0.530936	2	Nitrogen regulatory protein P-II
Q2RWY5	Rru_A0556	0.000810107	2.24088	0.00554353	1.62484	0.0482843	0.589271	0.271841	0.881632	5	Formyltetrahydrofolate deformylase
Q2RWY4	Rru_A0557	0.299368	0.772936	0.0723191	0.477303	0.504648	0.738546	0.261183	1.33492	3	Bifunctional protein FolD
Q2RWY2	Rru_A0559	0.00153283	0.32121	0.0859611	0.63249	0.0233351	2.44364	0.0221263	1.28342	5	Alpha/beta hydrolase fold
Q2RWY1	Rru_A0560	0.0128179	6.21768	0.00383768	6.00556	0.366115	1.25954	0.714474	1.20819	2	Cytochrome bd ubiquinol oxidase, subunit I
Q2RWX9	Rru_A0562	0.762298	0.885942	0.320059	2.96342	#N/A	#N/A	0.130979	0.438262	1	Peptidase S1 and S6, chymotrypsin/Hap
Q2RWX8	Rru_A0563	0.69789	1.03253	0.930299	0.986241	0.538693	0.925093	0.823582	0.968235	5	Twin-arginine translocation pathway signal
Q2RWX6	Rru_A0565	0.133163	0.529004	0.00935744	0.31858	0.736561	0.758169	0.643977	1.12222	2	Uncharacterized protein
Q2RWX5	Rru_A0566	0.00576465	6.31363	0.083595	2.82179	0.14297	1.244	0.0266715	3.13904	5	Uncharacterized protein
Q2RWX4	Rru_A0567	0.943236	1.03004	0.0202178	1.39172	0.938658	1.0093	0.458397	1.09573	5	Uncharacterized protein
Q2RWX3	Rru_A0568	0.879557	1.07665	0.0566986	1.57903	0.949186	0.974221	0.620627	0.754186	3	Chemotaxis sensory transducer
Q2RWX2	Rru_A0569	0.000407152	0.398439	0.0388268	0.232503	0.839419	0.951505	0.177303	1.54021	1	Chorismate mutase
Q2RWX1	Rru_A0570	0.243918	1.38785	0.546458	1.15285	0.762006	0.968917	0.133778	1.42151	5	Glutamate--cysteine ligase
Q2RWW7	Rru_A0574	0.000233453	2.91843	0.00418232	2.06408	0.616319	0.947451	0.315645	1.20451	3	3-octaprenyl-4hydroxybenzoate decarboxylase
Q2RWW6	Rru_A0575	0.00264559	0.614678	0.000636039	0.64109	0.0163726	0.871736	0.0268197	0.828985	5	Uncharacterized protein
Q2RWW4	Rru_A0577	#N/A	#N/A	#N/A	#N/A	0.818791	1.16037	#N/A	#N/A	0	Uncharacterized protein
Q2RWW1	Rru_A0580	0.00191942	0.483908	0.569001	1.11203	0.0237407	4.54986	0.058531	1.60892	3	OsmC-like protein
Q2RWV9	Rru_A0582	0.000970726	3.58806	0.549978	0.720054	0.156236	0.773262	0.208961	3.2295	1	Tetraacyldisaccharide 4'-kinase
Q2RWV5	Rru_A0586	0.0154925	0.321542	0.0300466	0.211516	0.16521	0.483358	0.465703	0.835701	3	10 kDa chaperonin
Q2RWV4	Rru_A0587	0.00492828	1.48312	0.0346104	0.610139	0.00413594	0.388826	0.343221	1.08113	6	60 kDa chaperonin 2
Q2RWV3	Rru_A0588	0.00360405	5.01553	0.00137379	5.22938	0.54171	0.859756	0.776602	0.803639	1	Oligopeptide/dipeptide ABC transporter, ATP-binding protein-like
Q2RWU9	Rru_A0592	0.00293399	0.680712	0.427892	0.836459	0.0521157	1.22161	0.766952	0.946107	5	Extracellular solute-binding protein, family 5
Q2RWU8	Rru_A0593	0.135518	1.27898	0.120701	0.622315	0.243673	0.723429	0.238084	1.31796	5	Sulfoxide reductase catalytic subunit YedY
Q2RWU6	Rru_A0595	0.202163	1.12656	0.959141	0.996255	0.126603	0.803617	0.834912	0.987927	6	Transketolase
Q2RWU5	Rru_A0596	0.793249	0.9818	0.916553	1.0131	0.109585	1.37021	0.117006	1.17654	6	Fructose-bisphosphate aldolase
Q2RWU3	Rru_A0598	0.00824992	2.64669	0.217414	0.810557	0.106758	1.57693	3.01758e-05	4.37158	5	Phosphate ABC transporter, periplasmic binding protein
Q2RWU0	Rru_A0601	0.30593	1.79649	0.557628	0.7338	0.512242	1.4619	0.214911	2.97925	1	Phosphate import ATP-binding protein PstB
Q2RWT4	Rru_A0607	#N/A	#N/A	#N/A	#N/A	#N/A	#N/A	#N/A	#N/A	3	denine phosphoribosyltransferase
Q2RWT3	Rru_A0608	0.228558	1.88851	0.253405	0.370281	0.577365	0.774135	0.911813	1.05241	6	TRAP transporter solute receptor, TAXI family
Q2RWT2	Rru_A0609	0.18791	1.49692	0.224379	0.799847	0.989051	0.995822	0.0280443	1.71468	1	UspA
Q2RWT1	Rru_A0610	0.00206634	1.43643	0.0208888	2.33581	0.0749852	1.2875	0.137366	0.836871	5	Uncharacterized protein
Q2RWS8	Rru_A0613	0.409848	1.91185	0.934575	0.95853	0.324794	1.5291	0.668084	1.31297	5	Bacteriochlorophyll 4-vinyl reductase
Q2RWS6	Rru_A0615	0.00229586	3.74993	0.0501016	2.20461	0.339246	1.18076	0.0176899	2.02393	3	Photosynthetic complex assembly protein
Q2RWS5	Rru_A0616	0.269624	0.754949	0.015158	0.308867	0.884301	1.06306	0.0187164	2.87203	3	Photosynthetic complex assembly protein
Q2RWS4	Rru_A0617	0.0311662	2.36778	0.102676	1.84324	0.501192	1.21112	0.000771072	1.50643	6	Photosynthetic reaction center, H-chain
Q2RWS3	Rru_A0618	#N/A	#N/A	#N/A	#N/A	0.0996431	2.26674	#N/A	#N/A	0	PUCC protein
Q2RWS2	Rru_A0619	0.00405007	3.78132	0.181066	1.5439	0.799669	0.938166	0.00703366	2.09303	3	Magnesium protoporphyrin O-methyltransferase
Q2RWS1	Rru_A062	2.86232e-06	3.87968	0.38282	0.840603	0.229558	0.744415	0.0032429	4.56579	6	protochlorophyllide reductase iron-sulfur ATP-binding protein
Q2RWS0	Rru_A0621	0.0021458	3.42689	0.646209	0.860292	0.36565	0.698566	0.00142572	2.84138	6	Hydrogenobyrinic acid a,c-diamide cobaltochelatase
Q2RWR9	Rru_A0622	0.0255622	2.8855	0.562152	0.860108	0.54793	0.881613	0.0465841	3.09305	6	Light-independent protochlorophyllide reductase subunit B
Q2RWR8	Rru_A0623	0.000132919	14.3067	0.084851	3.15227	0.101117	0.748908	1.0557e-05	4.08912	6	Light-independent protochlorophyllide reductase subunit N
Q2RWR6	Rru_A0625	0.987624	0.98962	0.992976	1.00687	0.772009	0.80353	0.413681	1.45028	1	Uncharacterized protein
Q2RWR5	Rru_A0626	0.0279897	1.42658	0.0838949	1.27683	0.0934463	1.19187	0.127261	1.25818	6	Transcriptional regulator, Fis family / DNA-binding protein Fis
Q2RWR4	Rru_A0627	0.000188495	1.74658	0.760899	0.94629	0.00584441	0.811707	0.157183	1.48032	2	Chlorophyll synthase
Q2RWR2	Rru_A0629	0.00163059	1.82504	0.0444595	1.2999	0.906554	1.01494	0.00850685	1.49782	3	Geranylgeranyl reductase
Q2RWQ7	Rru_A0634	0.055097	3.87084	0.193215	5.09639	0.115038	3.38131	0.866066	1.16413	1	Cyclic nucleotide-binding domain (CNMP-BD) protein
Q2RWQ4	Rru_A0637	0.010348	0.2949	0.0373619	0.291438	0.437021	2.2597	0.23323	1.34849	2	Uncharacterized protein
Q2RWP8	Rru_A0643	0.43849	1.19759	0.820403	1.04895	0.469197	0.808829	0.68673	1.12199	6	Uncharacterized protein
Q2RWP7	Rru_A0644	0.886694	0.897763	0.121405	0.162757	#N/A	#N/A	0.939455	0.971477	1	Uncharacterized protein
Q2RWP6	Rru_A0645	0.00471225	1.75236	0.495595	1.09503	0.219074	0.823087	0.075975	1.35428	5	Ribose-phosphate pyrophosphokinase
Q2RWP5	Rru_A0646	0.00167095	5.40752	0.00632692	3.58814	0.366031	0.942604	0.250526	1.17029	6	Phosphoribosylamine--glycine ligase
Q2RWP4	Rru_A0647	0.00982602	0.380525	0.299905	0.575945	0.412748	0.800152	0.802239	1.08054	4	L-threonine ammonia-lyase
Q2RWP3	Rru_A0648	#N/A	#N/A	#N/A	#N/A	0.252066	1.18454	#N/A	#N/A	0	Uncharacterized protein
Q2RWP0	Rru_A0651	0.391958	0.931097	0.115234	0.674494	0.247003	0.608337	0.748965	1.03328	1	Glutamine amidotransferase class-I
Q2RWN9	Rru_A0652	0.522039	1.04232	0.418247	1.57817	0.775295	0.959653	0.372857	0.605838	1	Pseudouridine synthase
Q2RWM9	Rru_A0662	#N/A	#N/A	#N/A	#N/A	#N/A	#N/A	#N/A	#N/A	3	ranslation initiation factor IF-1
Q2RWM7	Rru_A0664	#N/A	#N/A	#N/A	#N/A	0.54698	1.13855	#N/A	#N/A	0	Signal transduction histidine kinase
Q2RWM6	Rru_A0665	0.00212594	0.521112	0.00527349	0.396865	0.660046	1.05799	0.069799	1.23887	3	Response regulator receiver domain protein (CheY)
Q2RWM4	Rru_A0667	0.959867	1.04527	0.493545	1.75338	#N/A	#N/A	0.470113	1.53163	1	Nicotinate-nucleotide--dimethylbenzimidazole phosphoribosyltransferase
Q2RWM3	Rru_A0668	#N/A	#N/A	#N/A	#N/A	0.142692	0.672983	#N/A	#N/A	0	Cobalamin synthase
Q2RWM2	Rru_A0669	#N/A	#N/A	#N/A	#N/A	0.771113	0.973637	#N/A	#N/A	0	Phosphoglycerate/bisphosphoglycerate mutase
Q2RWM1	Rru_A0670	4.33365e-05	5.95595	0.00619617	2.98018	0.192431	0.682414	0.309629	1.64535	2	Adenosylcobinamide kinase
Q2RWM0	Rru_A0671	7.4907e-05	1.79024	0.416397	1.1755	0.411657	1.14841	0.0583361	1.67402	3	Cobalamin synthesis CobW protein
Q2RWL6	Rru_A0675	0.385575	0.790186	0.00227079	0.464793	0.965667	0.994291	0.00774041	1.54139	4	Uncharacterized protein
Q2RWL2	Rru_A0679	0.108147	2.71559	0.0022011	6.90167	0.856386	0.973235	0.310178	0.407428	1	Transcriptional regulator, TetR family
Q2RWL0	Rru_A0681	0.297642	0.776329	0.431301	1.29529	0.0357392	2.14141	0.679842	1.17677	3	Uncharacterized protein
Q2RWK9	Rru_A0682	0.0411638	2.17463	0.00998207	1.64564	0.623518	0.959184	0.0544111	1.4171	5	NADPH-glutathione reductase
Q2RWK8	Rru_A0683	0.00730275	0.679491	0.00644638	0.399532	0.103168	0.671051	0.353849	1.11578	6	3-deoxy-D-arabinoheptulosonate-7-phosphate synthase
Q2RWK7	Rru_A0684	0.868696	1.0435	0.200198	0.734085	0.701418	0.890504	0.27015	1.35374	5	Uncharacterized protein
Q2RWK4	Rru_A0687	0.0620991	0.755338	0.813644	0.931988	0.273443	0.905885	0.269295	0.905443	5	NH(3)-dependent NAD(+) synthetase
Q2RWK3	Rru_A0688	0.0559532	1.4297	0.390357	1.35938	0.436872	0.847988	0.675721	0.853788	6	Glutamate--tRNA ligase 1
Q2RWK2	Rru_A0689	#N/A	#N/A	#N/A	#N/A	#N/A	#N/A	#N/A	#N/A	5	Cysteine--tRNA ligase
Q2RWJ6	Rru_A0695	0.898058	1.01754	0.176956	0.696432	0.082024	0.566285	0.937355	0.990195	6	2-isopropylmalate synthase
Q2RWJ5	Rru_A0696	0.292545	1.61042	0.984624	1.01061	0.0937337	0.470931	0.86534	1.10218	1	RNA methyltransferase TrmH, group 1
Q2RWJ0	Rru_A0701	#N/A	#N/A	#N/A	#N/A	#N/A	#N/A	#N/A	#N/A	6	0S ribosomal protein S4
Q2RWI9	Rru_A0702	0.0721506	8.3688	0.225298	8.09976	0.283649	0.294779	0.4681	0.632485	1	Molybdenum import ATP-binding protein ModC
Q2RWI7	Rru_A0704	0.580891	1.0864	0.0034846	0.578824	0.0501319	0.552586	0.0743088	0.926151	6	Molybdenum ABC transporter, periplasmic binding protein
Q2RWI6	Rru_A0705	0.0664893	0.196882	6.19193e-05	0.273519	0.043037	2.14425	0.994187	1.00231	2	Glutaredoxin
Q2RWI4	Rru_A0707	0.00245044	0.562356	0.169558	0.70373	0.366058	1.22903	0.937034	0.986869	2	BolA-like protein
Q2RWI3	Rru_A0708	0.00543422	2.42636	0.0162293	1.67822	0.0256	0.591171	0.566804	1.04481	6	Phosphoribosylformylglycinamidine synthase 2
Q2RWI2	Rru_A0709	0.000263521	2.42517	0.00262451	1.55468	0.00165032	0.767455	0.464272	1.06915	6	Phosphoribosylformylglycinamidine synthase 1
Q2RWI1	Rru_A0710	0.0268052	1.49301	0.0661871	1.23184	0.164766	0.825242	0.385791	0.930282	2	Phosphoribosylformylglycinamidine synthetase PurS
Q2RWI0	Rru_A0711	0.229987	0.335168	0.284708	0.0895416	0.24069	0.564762	0.368706	0.473274	3	Phosphoribosylaminoimidazole-succinocarboxamide synthase
Q2RWH9	Rru_A0712	0.00611132	1.51494	0.569624	1.69473	0.171711	0.51518	0.17143	0.83831	2	Transcriptional regulator, XRE family
Q2RWH7	Rru_A0714	0.00102121	0.308452	0.0560346	0.148384	#N/A	#N/A	0.526058	0.852149	1	Uncharacterized protein
Q2RWH5	Rru_A0716	0.00897136	1.69833	0.648191	1.02941	0.566328	0.929808	0.000931991	1.57755	6	Adenylosuccinate lyase
Q2RWH3	Rru_A0718	0.350086	1.13994	0.407543	0.737803	0.552282	0.800548	0.0622228	1.38713	6	Chemotaxis sensory transducer
Q2RWH1	Rru_A0720	0.0017164	0.485243	0.00246	0.227101	0.844307	1.19511	0.999264	0.999904	3	Transcriptional regulator, MarR family
Q2RWG8	Rru_A0723	0.00402303	3.80366	0.0138525	8.53012	0.0471405	1.64709	0.115067	0.776438	1	Amine oxidase
Q2RWG4	Rru_A0727	0.534934	1.40129	0.853277	0.93152	0.636393	1.24749	0.206568	1.45506	1	Uncharacterized protein
Q2RWF8	Rru_A0733	0.00625947	2.69045	0.0400681	1.47831	0.474911	0.912194	0.0795808	1.55707	5	Methionine aminopeptidase
Q2RWF6	Rru_A0735	0.138463	1.20792	0.21902	1.25408	0.496368	1.03705	0.537328	1.09316	2	Sugar fermentation stimulation protein homolog
Q2RWF5	Rru_A0736	0.393622	1.48008	0.0954709	1.71898	0.19521	0.781888	0.794552	0.897579	3	Uncharacterized protein
Q2RWF3	Rru_A0738	0.0174557	0.411361	0.0680469	0.105377	0.466689	1.60762	0.0839931	4.94588	3	Glutaredoxin, GrxC
Q2RWF2	Rru_A0739	0.993429	1.00095	0.521556	0.911772	0.0187029	1.50453	0.0968665	1.39211	6	Nitrilase/cyanide hydratase and apolipoprotein N-acyltransferase
Q2RWE9	Rru_A0742	0.0396743	1.3693	0.212645	1.1685	0.109331	0.871109	0.810859	1.02837	6	3-demethylubiquinone-9 3-methyltransferase
Q2RWE8	Rru_A0743	0.00189407	0.514371	0.00474659	0.345332	0.0736554	0.573834	0.14986	0.882447	5	Aspartokinase
Q2RWE7	Rru_A0744	0.179063	1.25148	0.624556	1.09803	0.458869	0.908845	0.968807	1.00759	5	2-nitropropane dioxygenase, NPD
Q2RWE6	Rru_A0745	0.0897659	1.31048	0.150923	1.52911	0.227448	0.917818	0.933008	1.02379	4	PTSINtr with GAF domain, PtsP
Q2RWE5	Rru_A0746	0.0117561	4.43413	0.0080835	3.73377	0.0811039	0.780669	0.126709	1.17096	2	Uncharacterized protein
Q2RWE4	Rru_A0747	0.00323454	1.58553	0.331442	0.77255	0.127539	0.661213	0.001434	1.66398	5	4-hydroxy-3-methylbut-2-en-1-yl diphosphate synthase
Q2RWE3	Rru_A0748	0.0525988	0.587426	0.901783	0.971964	0.879904	0.941612	0.06017	0.568718	5	Histidine--tRNA ligase
Q2RWE2	Rru_A0749	0.0452112	3.26041	0.0787958	3.21684	0.110103	0.701141	0.385053	4.77167	2	Glutamyl-tRNA reductase
Q2RWE1	Rru_A0750	#N/A	#N/A	#N/A	#N/A	#N/A	#N/A	#N/A	#N/A	3	eptide chain release factor 1
Q2RWE0	Rru_A0751	0.0386412	4.99785	0.114944	4.2122	0.360242	1.14721	0.107809	1.40543	2	Release factor glutamine methyltransferase
Q2RWD9	Rru_A0752	0.931036	0.990551	0.115706	0.829265	0.0602775	0.501338	0.000286335	0.650265	6	Uncharacterized protein
Q2RWD8	Rru_A0753	0.00110867	2.27694	0.0284291	3.2682	0.00271678	0.617082	0.0552454	0.610342	6	Chaperone clpB
Q2RWD6	Rru_A0755	0.257311	0.753116	0.185304	0.545432	0.0263086	0.531959	0.0995905	0.696577	4	Chemotaxis sensory transducer
Q2RWD2	Rru_A0759	0.86524	1.06778	0.0202384	4.71604	0.0263905	7.94093	0.334023	0.588365	4	Aldo/keto reductase
Q2RWD1	Rru_A0760	0.579908	1.16912	0.0687392	15.3962	0.0653525	12.1419	0.549049	0.833204	4	Uncharacterized protein
Q2RWC9	Rru_A0762	0.0140123	2.03464	0.0344992	9.60599	0.0145605	14.2016	0.0520763	0.769774	4	Fe-S oxidoreductase
Q2RWC6	Rru_A0765	0.0823289	1.65524	0.00739173	1.99183	0.546529	0.753101	0.152863	1.43152	3	Uncharacterized protein
Q2RWC2	Rru_A0769	0.0135488	0.195309	0.562932	0.6601	0.248331	1.69129	0.243274	0.555063	4	Extracellular solute-binding protein, family 1
Q2RWB7	Rru_A0774	0.614261	0.917323	0.0323042	3.98273	0.237311	1.61204	1.76858e-05	0.342587	4	O-acetylhomoserine/O-acetylserine sulfhydrylase
Q2RWB6	Rru_A0775	0.000417772	2.27729	0.112039	1.9395	0.10252	1.83791	0.512046	1.36827	3	2OG-Fe(II) oxygenase
Q2RWB2	Rru_A0779	0.555096	1.17075	0.132479	2.69589	0.848032	1.12409	0.0693939	0.550482	1	Extracellular solute-binding protein, family 3
Q2RWA7	Rru_A0784	0.00687527	1.70486	0.000636946	3.51723	0.0405359	1.72453	0.401929	0.855263	6	O-acetylhomoserine/O-acetylserine sulfhydrylase
Q2RW96	Rru_A0785	0.100294	1.34425	0.208705	2.50804	0.297323	2.31303	0.593113	1.19649	5	Nitrogenase iron protein
Q2RWA5	Rru_A0786	0.892937	0.963749	0.115864	1.21781	0.215718	1.14351	0.636928	0.872634	6	Cystathionine gamma-lyase
Q2RWA0	Rru_A0791	0.117511	0.757875	0.00300071	2.17351	1.49048e-06	3.10489	0.723572	1.0605	1	NLPA lipoprotein
Q2RW98	Rru_A0793	0.217339	1.48026	0.0551477	1.61186	0.0394085	3.04986	0.0701768	1.46694	2	Nitrogenase
Q2RW97	Rru_A0794	0.482403	1.29703	0.0147049	3.27246	0.134599	1.76873	0.486721	0.831672	4	Nitrogenase
Q2RW82	Rru_A0809	0.356323	0.402558	0.218756	0.328969	0.0306266	2.19843	0.486466	1.62617	3	Uncharacterized protein
Q2RW81	Rru_A0810	0.0066857	0.407305	0.233234	0.580853	0.0483644	2.33927	0.329251	1.4745	3	Uncharacterized protein
Q2RW79	Rru_A0814	0.0213341	0.672586	0.356864	0.790244	0.0615638	1.20753	0.827937	0.955594	2	Uncharacterized protein
Q2RW78	Rru_A0815	0.00997021	0.307169	0.0249772	0.328975	0.569557	0.627847	0.0597639	1.68653	1	Uncharacterized protein
Q2RW71	Rru_A0822	0.542896	0.871811	0.520783	0.816031	0.103241	1.79643	0.202634	1.38272	3	Uncharacterized protein
Q2RW70	Rru_A0823	0.00108409	0.5232	0.00374013	0.460636	0.621943	1.05676	0.110931	1.18803	1	Cupin region
Q2RW65	Rru_A0829	0.0225772	2.96323	0.795655	1.22539	0.20361	0.626241	0.40118	1.3476	2	CRISPR-associated protein, Csd5d family
Q2RW64	Rru_A0830	0.0142603	0.0108447	0.0366624	0.00833622	0.532573	1.48201	0.354316	1.34042	1	CRISPR-associated protein, Csd1 family
Q2RW63	Rru_A0831	0.00795444	3.13004	0.741618	0.879096	0.0641873	1.29239	0.114309	3.67519	4	CRISPR-associated protein, Csd2 family
Q2RW57	Rru_A0837	0.0103269	3.565	0.0308788	3.28154	0.0746993	1.76083	0.649773	1.46825	1	Leucine-rich repeat
Q2RW42	Rru_A0852	0.00994214	1.71307	0.000685002	3.76093	0.238603	0.664879	0.360214	1.2568	2	Uncharacterized protein
Q2RW23	Rru_A0871	#N/A	#N/A	#N/A	#N/A	0.0295955	33.9494	#N/A	#N/A	0	Uncharacterized protein
Q2RW21	Rru_A0873	0.229751	0.278595	0.0662896	1.89512	0.00685601	8.60648	0.434841	0.559943	2	Uncharacterized protein
Q2RW19	Rru_A0875	#N/A	#N/A	#N/A	#N/A	0.000917943	4.93154	#N/A	#N/A	0	Uncharacterized protein
Q2RW18	Rru_A0876	0.0200602	0.295191	0.16095	2.9104	0.0977258	22.7175	0.509379	1.43339	2	Uncharacterized protein
Q2RW16	Rru_A0878	0.377098	0.709702	0.320765	1.48298	0.068202	2.68942	0.409713	0.748521	2	ABC transporter component
Q2RW03	Rru_A0891	0.00408521	2.46475	0.0149704	0.573341	0.0782342	0.668651	0.0124945	2.79576	6	Tellurite resistance TerB
Q2RW02	Rru_A0892	8.92276e-05	1.93184	3.28176e-05	0.520605	0.00566423	0.696219	4.07993e-06	2.60383	6	Stress protein
Q2RW01	Rru_A0893	0.897423	1.07726	0.168715	0.210077	0.352791	0.579677	0.17202	4.62695	1	Stress protein
Q2RW00	Rru_A0894	0.0473042	1.64103	0.0122373	0.702543	0.278849	0.787554	3.0193e-05	1.6881	6	Stress protein
Q2RVY6	Rru_A0908	0.155739	0.241115	0.44132	0.287191	0.694891	0.7407	0.93828	0.932798	1	Microcompartments protein
Q2RVX7	Rru_A0917	0.979738	1.00693	0.727715	1.18238	0.305671	1.14724	0.872462	0.91666	1	S-adenosylmethionine synthase 1
Q2RVW4	Rru_A0930	0.000866387	0.484854	0.342099	9.37501	0.402818	7.03671	0.00037415	0.27744	6	Iron-containing alcohol dehydrogenase
Q9ZA11	Rru_A0931	5.80851e-05	0.308467	0.276908	3.85786	0.302445	3.41159	0.000500806	0.256588	6	Aldehyde dehydrogenase
Q2RVW2	Rru_A0932	0.233889	0.429315	0.0290691	0.214728	0.839139	1.2454	0.77327	1.12662	2	Sigma54 Specific Transcriptional Regulator containing GAF,
Q2RVW1	Rru_A0933	0.133716	3.21815	0.0211977	3.83754	0.142638	1.5845	0.214746	1.60603	1	DegT/DnrJ/EryC1/StrS aminotransferase
Q2RVW0	Rru_A0934	0.0449311	1.3645	0.0524365	1.99389	0.121538	1.3134	0.848757	1.04072	4	Uncharacterized protein
Q2RVV9	Rru_A0935	0.0346827	0.331504	0.0631924	0.588803	0.0933978	1.64063	0.556997	0.863524	3	NAD-dependent epimerase/dehydratase
Q2RVV8	Rru_A0936	0.91678	1.03627	0.257514	1.42893	0.180559	1.46733	0.886372	0.940872	3	Uncharacterized protein
Q2RVV7	Rru_A0937	0.119899	1.76385	0.256083	1.80097	0.118928	1.4462	0.845375	1.08848	2	Coenzyme F420 hydrogenase/dehydrogenase beta subunit-like
Q2RVV5	Rru_A0939	0.00234804	2.04247	0.0177768	1.68459	0.336062	0.957875	0.458972	1.15363	4	DNA ligase
Q2RVV4	Rru_A0940	0.0912883	3.95779	0.355357	2.95775	0.0550524	0.655695	0.470821	1.25615	3	DNA repair protein RecN
Q2RVV3	Rru_A0941	0.018595	3.4809	0.0399332	3.4171	0.0854478	0.369409	0.421892	0.891616	2	Outer membrane protein assembly factor BamD
Q2RVV2	Rru_A0942	0.0113888	0.266558	0.292401	0.843695	0.87842	0.9761	0.012525	0.300907	1	GreA/GreB family elongation factor
Q2RVV1	Rru_A0943	0.0242235	0.308974	0.281917	0.270228	0.492127	0.344607	0.808675	0.874347	1	UDP-3-O-[3-hydroxymyristoyl] N-acetylglucosamine deacetylase
Q2RVV0	Rru_A0944	0.000243615	2.33332	0.0556096	1.79951	0.656582	0.950164	0.0733553	1.30794	6	Cell division protein FtsZ
Q2RVU9	Rru_A0945	0.910721	1.01673	0.216566	0.794504	0.0797074	0.832633	0.354522	1.19646	6	Cell division protein ftsA
Q2RVU7	Rru_A0947	#N/A	#N/A	#N/A	#N/A	#N/A	#N/A	#N/A	#N/A	3	D-alanine--D-alanine ligase
Q2RVU6	Rru_A0948	0.46717	1.69866	0.216689	0.783911	0.614316	0.91247	0.679088	1.09907	2	UDP-N-acetylenolpyruvoylglucosamine reductase
Q2RVU5	Rru_A0949	0.0296014	2.23964	0.574135	1.06103	0.275744	0.862109	0.00229295	1.5651	3	UDP-N-acetylmuramate--L-alanine ligase
Q2RVU4	Rru_A0950	0.0136863	1.45385	0.176914	0.804501	0.0770536	0.825909	0.100038	1.26027	6	N-acetylmuramyl- pyrophosphoryl-undecaprenol N-acetylglucosamine transferase
Q2RVU2	Rru_A0952	0.0190665	1.98823	0.160494	1.23102	0.483927	0.89871	0.56434	1.15691	5	UDP-N-acetylmuramoylalanine--D-glutamate ligase
Q2RVU0	Rru_A0954	0.0544413	1.44726	0.460947	0.904678	0.176131	0.737104	0.0688973	1.28055	3	UDP-N-acetylmuramoyl-tripeptide--D-alanyl-D-alanine ligase
Q2RVT9	Rru_A0955	0.000480586	2.29435	0.618785	0.926447	0.0152129	0.671578	0.065874	1.62487	6	UDP-N-acetylmuramoyl-L-alanyl-D-glutamate--2,6-diaminopimelate ligase
Q2RVT6	Rru_A0958	3.06523e-05	0.245604	0.0493213	0.481812	0.00244628	2.15691	0.676777	0.941004	2	Ribosomal RNA small subunit methyltransferase H
Q2RVT5	Rru_A0959	0.772208	1.0615	0.134778	0.618931	0.0669467	0.605398	0.258504	1.11167	4	Protein MraZ
Q2RVT3	Rru_A0961	0.0338491	1.20719	0.284612	0.797714	0.0262834	0.726295	0.800432	1.04365	4	Uncharacterized protein
Q2RVS9	Rru_A0965	0.190195	0.784455	0.202008	5.80345	0.279896	3.02967	0.0105288	0.388819	2	(2Fe-2S)-binding protein
Q2RVS8	Rru_A0966	0.359373	1.21768	0.0317548	4.01096	0.139243	2.2857	0.00787053	0.479587	6	Xanthine dehydrogenase, molybdenum binding subunit apoprotein
Q2RVS7	Rru_A0967	7.80562e-05	0.182455	0.355684	1.45019	0.0700635	3.39576	0.00326133	0.508478	4	Carbon-monoxide dehydrogenase
Q2RVS6	Rru_A0968	0.0771832	1.79962	0.135155	5.6488	0.296959	2.6464	0.776957	0.895402	2	ATPase associated with various cellular activities, AAA_5
Q2RVS4	Rru_A0970	0.407977	1.68811	0.56311	1.58278	0.809427	1.04468	0.908052	0.948289	1	Uncharacterized protein
Q2RVS2	Rru_A0972	0.00245973	0.595325	0.767392	0.867009	0.14532	0.526321	0.00393718	0.34626	5	Prephenate dehydrogenase
Q2RVS1	Rru_A0973	0.0359427	2.01949	0.23453	0.882348	0.344117	0.818293	0.00172747	2.02132	6	Uncharacterized protein
Q2RVS0	Rru_A0974	0.00856134	2.11492	0.629254	0.824744	0.259779	0.774396	0.238026	2.01277	6	Linocin_M18 bacteriocin protein
Q2RVR7	Rru_A0977	0.0118904	3.45318	0.0569399	11.4495	0.00496232	3.32228	0.129196	0.386307	1	Uncharacterized protein
Q2RVQ5	Rru_A0989	0.982843	0.985486	0.0199488	1.7511	0.81478	0.828091	0.722159	0.938922	1	Twin-arginine translocation pathway signal
Q2RVQ4	Rru_A0990	0.240425	1.82747	0.122175	4.52095	0.965738	1.03857	0.125984	0.48873	1	Diguanylate cyclase/phosphodiesterase
Q2RVQ1	Rru_A0993	0.218412	2.00401	0.0874063	1.66079	0.00310606	1.82995	0.0752342	3.28631	5	Transcriptional regulator, NifA, Fis family
Q2RVP9	Rru_A0995	0.590297	1.21041	0.0855383	0.608384	0.0608788	2.62413	0.0106904	3.40583	2	4Fe-4S ferredoxin, iron-sulfur binding
Q2RVP3	Rru_A1001	0.00293902	2.48703	0.00965919	2.23699	0.0378537	1.45565	0.0218915	1.41667	6	ABC transporter component
Q2RVP2	Rru_A1002	0.0484179	3.77148	0.0723765	7.38707	0.575856	1.31906	0.0355254	0.625283	1	Amino acid ABC transporter, permease protein, 3-TM region, His/Glu/Gln/Arg/opine
Q2RVP1	Rru_A1003	0.141817	1.31774	0.0967421	1.55306	0.0729641	1.67541	0.112584	1.35436	3	Amino acid ABC transporter, permease protein, 3-TM region, His/Glu/Gln/Arg/opine
Q2RVP0	Rru_A1004	0.00209454	0.259789	0.203614	1.36167	0.0367744	3.69694	0.010648	0.579912	6	Lysine-arginine-ornithine-binding periplasmic protein
Q2RVN9	Rru_A1005	0.0082984	2.58225	0.00347278	2.65873	0.293383	0.823843	0.790544	0.915029	2	Glycosyl transferase, family 2
Q2RVN6	Rru_A1008	0.833567	1.04613	0.180624	1.42725	0.18262	1.82363	0.295081	0.71293	2	ADP-ribosyl-(Dinitrogen reductase) hydrolase
Q2RVN4	Rru_A1010	0.631902	0.863662	0.220196	2.08217	0.131523	17.253	0.67656	0.885766	1	Nitrogenase iron protein
Q2RVN1	Rru_A1013	0.00459801	2.02603	0.148053	1.44564	0.196163	0.762806	0.85655	1.05386	5	ABC transporter component
Q2RVM7	Rru_A1017	0.00335585	1.99685	0.00310724	2.77473	0.0107618	1.86005	0.208467	1.2963	4	Spermidine/putrescine ABC transporter ATP-binding subunit
Q2RVM6	Rru_A1018	0.00433073	0.477433	0.0863254	1.39451	0.0137617	3.96771	0.348941	1.02954	5	Extracellular solute-binding protein, family 1
Q2RVM5	Rru_A1019	0.658746	0.829657	0.205109	0.797276	0.0983211	0.640023	0.591165	0.793908	2	FAD dependent oxidoreductase
Q2RVM4	Rru_A1020	0.260967	0.857179	0.968525	0.992246	0.228897	2.19898	0.00445232	1.91752	6	Cytochrome c2
Q2RVM3	Rru_A1021	0.0085558	3.97301	0.225677	1.67631	0.476232	0.860498	0.323057	1.87141	1	RNA polymerase sigma factor
Q2RVM2	Rru_A1022	0.404149	1.2162	0.0728915	1.64552	0.117866	1.25887	0.21492	0.732397	4	Uncharacterized protein
Q2RVL8	Rru_A1026	0.439951	1.35826	0.396546	0.394048	0.95744	1.00652	0.422933	2.31949	1	Transcriptional regulator, MerR family
Q2RVL6	Rru_A1028	#N/A	#N/A	#N/A	#N/A	0.301415	0.683279	#N/A	#N/A	0	Uncharacterized protein
Q2RVL1	Rru_A1033	0.709362	1.16263	0.793741	1.17763	0.31412	3.56501	0.0549744	1.97516	3	Uncharacterized protein
Q2RVL0	Rru_A1034	0.162177	2.72349	0.0661253	2.54889	0.670398	0.807148	0.28698	1.27193	4	Multi-sensor signal transduction histidine kinase
Q2RVK4	Rru_A1040	0.0223989	0.662316	0.0410858	0.616541	0.0267126	0.308269	0.0123901	0.606433	4	Leucine dehydrogenase
Q2RVK2	Rru_A1042	0.270413	1.36089	0.503144	1.11655	0.149266	0.558636	0.17032	0.676644	3	Uncharacterized protein
Q2RVK0	Rru_A1044	0.162666	1.29874	0.0847934	1.22184	0.0196249	0.67185	0.0136027	0.778636	4	Peptide deformylase
Q2RVJ9	Rru_A1045	0.0109784	1.74654	0.565506	0.94036	0.0629719	0.635784	0.0218246	1.18734	3	Uncharacterized protein
Q2RVJ8	Rru_A1046	0.26985	1.14674	0.564465	1.13867	0.101321	1.95657	0.0369157	1.65527	6	AMP-dependent synthetase and ligase
Q2RVJ7	Rru_A1047	0.0438327	1.55675	0.388132	1.31414	0.289603	0.737766	0.551375	1.0602	6	6-phosphofructokinase
Q2RSY8	Rru_A1048	0.141474	2.30114	0.104026	3.82621	0.0181301	7.8433	0.60022	0.842853	3	7-cyano-7-deazaguanine synthase
Q2RVJ6	Rru_A1048	0.105715	0.222364	0.0317356	0.227856	#N/A	#N/A	0.247249	1.57926	1	Uncharacterized protein
Q2RVJ2	Rru_A1052	#N/A	#N/A	#N/A	#N/A	0.373766	1.30374	#N/A	#N/A	0	Response regulator receiver domain protein (CheY)
Q2RVI9	Rru_A1055	0.000501089	0.000511546	0.068609	0.00429417	0.380448	4.17388	0.627676	0.863351	3	Uncharacterized protein
Q2RVI8	Rru_A1056	2.73839e-06	0.322834	0.00166467	0.408031	0.559994	1.13435	0.558202	1.04437	5	Zinc-containing alcohol dehydrogenase superfamily
Q2RVI7	Rru_A1057	1.68356e-05	0.35164	0.0472957	1.95099	0.0217841	5.19456	0.203004	0.783719	5	3-hydroxybutyrate dehydrogenase
Q2RVH4	Rru_A1070	0.175294	0.533087	0.155713	2.21437	0.00192787	0.320072	0.0397412	0.0774281	4	Heat shock protein Hsp20
Q2RVH3	Rru_A1071	0.625317	0.928433	0.352602	1.37711	0.0446305	0.514868	0.24162	0.665927	4	Adenylate/guanylate cyclase
Q2RVH1	Rru_A1073	0.0053758	3.96949	0.706305	1.30144	0.28675	0.598691	0.315727	2.0409	1	OmpA/MotB
Q2RVH0	Rru_A1074	0.477643	1.11678	0.461699	1.16516	0.109366	0.677145	0.0839581	0.67835	4	MotA/TolQ/ExbB proton channel family protein
Q2RVG9	Rru_A1075	0.0580745	1.50136	0.0630709	1.58791	0.843406	0.959437	0.284783	0.967743	6	Uncharacterized protein
Q2RVG8	Rru_A1076	0.22687	1.32372	0.330155	1.59192	0.0783404	0.637181	0.517854	0.864471	3	Inositol monophosphatase
Q2RVG7	Rru_A1077	0.0180292	0.617257	0.0202224	0.303762	0.0128076	0.387692	0.560769	0.904728	3	Elongationfactor P
Q2RVG5	Rru_A1079	0.0642576	2.86116	0.163649	2.12321	0.188486	0.592311	0.560424	1.54288	2	Sodium/hydrogen exchanger
Q2RVG4	Rru_A1080	0.0289709	0.474029	0.0027626	0.418292	0.13229	0.898743	0.986492	0.997344	3	Thiamine-phosphate synthase
Q2RVG2	Rru_A1082	#N/A	#N/A	#N/A	#N/A	0.0630336	0.680113	#N/A	#N/A	0	Uncharacterized protein
Q2RVG1	Rru_A1083	0.154615	0.757489	0.0514385	0.546206	0.981814	0.981599	0.828119	1.04213	2	Uncharacterized protein
Q2RVG0	Rru_A1084	2.04256e-05	7.06403	0.0255355	3.33844	0.0776892	0.700927	0.00725145	1.43531	1	5-formyltetrahydrofolate cyclo-ligase
Q2RVF9	Rru_A1085	0.0217385	1.55482	0.872725	0.949519	0.125985	0.651108	0.594523	1.09702	4	Metallophosphoesterase
Q2RVF8	Rru_A1086	0.0075509	0.665305	0.193223	0.712854	0.769834	0.960355	0.602463	0.911043	4	Probable transcriptional regulatory protein Rru_A1086
Q2RVF1	Rru_A1093	0.00243446	2.37951	0.0448867	1.37265	0.105094	0.770922	0.198417	1.37251	2	Uncharacterized protein
Q2RVF0	Rru_A1094	0.00120539	0.612304	0.000367151	0.369435	0.527771	0.898623	0.00130746	1.50075	6	Protein TolB
Q2RVE9	Rru_A1095	0.00235969	0.0725017	0.00979928	0.0774913	0.240088	0.315866	0.981703	0.995911	5	OmpA/MotB
Q2RVE8	Rru_A1096	0.153073	1.24779	0.0218572	1.4386	0.21049	1.28796	0.38286	1.07348	6	Uncharacterized protein
Q2RVE6	Rru_A1098	0.353777	1.06748	0.0184467	0.551671	0.048075	0.649305	0.0110198	1.31474	6	ATP-dependent zinc metalloprotease FtsH
Q2RVE5	Rru_A1099	0.462219	0.499894	0.164991	0.652023	0.102708	0.854466	0.622395	0.671139	3	Dihydropteroate synthase
Q2RVE4	Rru_A1100	0.000851965	0.286401	0.0903828	0.624469	0.760478	0.863972	0.859132	1.0306	2	Phosphoglucosamine mutase
Q2RVE3	Rru_A1101	0.000591205	1.94101	0.00739083	0.657718	0.0033829	0.540153	0.00638275	1.62882	6	Uncharacterized protein
Q2RVE2	Rru_A1102	0.010241	1.37983	0.165916	1.24689	0.430609	1.07568	0.27707	1.21058	3	Phosphomethylpyrimidine kinase
Q2RVE1	Rru_A1103	0.129296	2.29482	0.556869	1.63232	0.405415	3.52257	0.592926	1.40282	3	Phenazine biosynthesis PhzC/PhzF protein
Q2RVE0	Rru_A1104	0.409147	1.07827	0.0197416	0.699033	0.406175	0.895747	0.00456763	1.34204	6	Phosphoserine aminotransferase
Q2RVD9	Rru_A1105	0.00012869	2.96929	0.00269533	1.57817	0.000184513	0.55056	0.496986	1.11994	6	ATP phosphoribosyltransferase regulatory subunit
Q2RVD8	Rru_A1106	0.591269	1.05783	0.00461018	0.768284	0.0184096	0.590993	0.966683	0.997866	6	Adenylosuccinate synthetase
Q2RVD7	Rru_A1107	0.0232651	1.94331	0.0154874	2.28395	0.544673	0.905212	0.475265	0.795078	3	Uncharacterized protein
Q2RVD5	Rru_A1109	0.0138114	2.969	0.0329157	0.545432	0.410099	0.516978	0.0350482	2.55735	1	Chemotaxis sensory transducer
Q2RVD4	Rru_A1110	#N/A	#N/A	#N/A	#N/A	0.534397	1.30245	#N/A	#N/A	0	RNA polymerase sigma factor
Q2RVD2	Rru_A1112	#N/A	#N/A	#N/A	#N/A	0.578435	0.809684	#N/A	#N/A	0	Uncharacterized protein
Q2RVC8	Rru_A1116	0.548251	0.613482	0.181096	0.509571	0.0392076	0.31178	0.346089	0.365478	1	Transcriptional regulator, TetR family
Q2RVC6	Rru_A1118	#N/A	#N/A	#N/A	#N/A	0.00699357	0.374062	#N/A	#N/A	0	Hydrophobe/amphiphile efflux-1 HAE1
Q2RVC3	Rru_A1121	0.177323	1.28965	0.0344028	1.76215	0.377914	1.23195	0.0253377	1.44114	6	Pyruvate carboxylase
Q2RVC1	Rru_A1123	0.523198	1.23254	0.673995	0.812569	0.460526	0.78436	0.379215	1.64564	3	Ala-tRNA(Pro) hydrolase
Q2RVC0	Rru_A1124	0.00215492	3.07431	0.00875484	2.53448	0.0401331	0.719254	0.883922	1.03372	6	D-lactate dehydrogenase (Cytochrome)
Q2RVB5	Rru_A1129	#N/A	#N/A	#N/A	#N/A	0.759661	0.843713	#N/A	#N/A	0	Ammonium transporter
Q2RVB4	Rru_A1130	0.00314468	1.83919	0.0190725	1.76566	0.034814	1.5965	0.129385	1.50376	5	Nitrogen regulatory protein P-II
Q2RVB1	Rru_A1133	0.000219976	2.69549	0.142967	3.06714	0.605688	0.858023	0.132429	0.689604	2	UvrABCsystem protein B
Q2RVA9	Rru_A1135	0.000141672	1.9871	0.00376586	1.34427	0.074256	0.767805	0.00738896	1.16546	6	Aminotransferase
Q2RVA8	Rru_A1136	0.944446	0.992218	0.130862	1.31607	0.0948432	1.40637	0.233842	0.894882	6	Periplasmic binding protein
Q2RVA5	Rru_A1139	0.695192	1.1367	0.243897	0.673242	0.14469	3.16189	0.094513	2.12947	2	Blue (Type 1) copper subtype
Q2RVA4	Rru_A1140	0.0485144	1.40495	0.0206564	0.781125	0.0480366	0.801996	0.00061517	1.38054	6	Elongation factor G
Q2RV96	Rru_A1148	0.000302195	1.52504	0.0119949	1.87633	0.0463428	1.74775	0.104789	1.29356	6	Uncharacterized protein
Q2RV95	Rru_A1149	0.000781974	2.53763	0.000730512	3.53616	0.0195314	1.67947	0.418504	1.15463	6	Uncharacterized protein
Q2RV94	Rru_A1150	0.00742265	2.80473	0.00559176	3.53844	0.0411604	1.5257	0.104442	1.15416	5	Uncharacterized protein
Q2RV93	Rru_A1151	0.00765559	2.13348	0.00219945	2.93116	0.0537643	1.62908	0.586951	1.08656	6	Uncharacterized protein
Q2RV83	Rru_A1161	#N/A	#N/A	#N/A	#N/A	0.520848	0	#N/A	#N/A	0	Ni-Fe hydrogenase, small subunit
Q2RV82	Rru_A1162	0.292283	0.781301	0.11441	1.64786	0.0751498	3.13091	0.484565	1.22918	5	Nickel-dependent hydrogenase, large subunit
Q2RV78	Rru_A1166	0.0141674	0.532468	0.0148194	2.41042	0.00969936	4.77838	0.795481	1.05522	3	Hydrogenase expression/formation protein hupH
Q2RV75	Rru_A1169	0.00254749	0.0650071	0.222703	0.350158	0.220608	6.61283	0.951097	1.02703	1	Hydrogenase accessory protein HypB
Q2RV74	Rru_A1170	0.620947	1.15546	0.164772	0.779434	0.25821	1.1891	0.937075	0.978621	4	Two component, sigma54 specific, transcriptional regulator, Fis family
Q2RV73	Rru_A1171	0.203872	0.738915	0.0085087	0.386237	0.0383015	0.676741	0.0607297	1.50799	2	Transcriptional regulator, BadM/Rrf2 family
Q2RV70	Rru_A1174	#N/A	#N/A	#N/A	#N/A	0.478782	0.611136	#N/A	#N/A	0	Endoribonuclease L-PSP
Q2RV69	Rru_A1175	0.000541451	0.274491	1.33887e-05	0.385998	0.012603	2.07239	0.00418704	1.47064	4	CsbD-like
Q2RV68	Rru_A1176	#N/A	#N/A	#N/A	#N/A	0.0968885	0.574553	#N/A	#N/A	0	Histone deacetylase superfamily
Q2RV65	Rru_A1179	0.131704	0.247009	0.487052	0.883875	0.577484	1.12249	0.173177	0.349458	2	Transcriptional regulator, DeoR family
Q2RV63	Rru_A1181	0.000293377	1.84448	0.168317	1.26958	0.427466	0.890244	0.241041	1.21426	1	Signal recognition particle receptor FtsY
Q2RNG2	Rru_A1182	#N/A	#N/A	#N/A	#N/A	0.990032	1.00704	#N/A	#N/A	0	[Protein-PII] uridylyltransferase
Q2RV61	Rru_A1183	0.000484455	0.507765	0.0447876	0.49748	0.560386	0.91908	0.832442	0.97258	2	Diaminopimelate epimerase
Q2RV60	Rru_A1184	0.000367793	3.08276	0.00091597	2.42915	0.00341444	0.63809	0.638194	0.903532	5	Signal recognition particle protein
Q2RV59	Rru_A1185	0.827643	1.04349	0.31404	0.547924	#N/A	#N/A	0.660341	0.874295	1	30S ribosomal protein S16
Q2RV58	Rru_A1186	0.439856	1.33002	0.141722	4.68729	0.831525	1.09919	0.557775	0.786502	2	Ribosome maturation factor RimM
Q2RV57	Rru_A1187	0.221608	0.763769	0.760092	1.04659	0.749126	0.975944	0.188931	0.727135	3	tRNA (guanine-N(1)-)-methyltransferase
Q2RV56	Rru_A1188	3.8925e-05	0.118954	2.57122e-05	0.0885863	0.248842	0.48142	0.0104199	0.728685	2	50S ribosomal protein L19
Q2RV55	Rru_A1189	0.689909	1.02924	0.0392694	0.796885	0.448853	0.915933	0.0858946	1.12038	5	3-isopropylmalate dehydratase large subunit
Q2RV54	Rru_A1190	0.717831	1.14023	0.0237424	0.784113	0.552746	1.0633	0.254139	1.4938	6	3-isopropylmalate dehydratase small subunit
Q2RV53	Rru_A1191	0.0305778	0.743616	0.0891249	0.777731	0.0825399	0.832845	0.196336	0.872511	6	3-isopropylmalate dehydrogenase
Q2RV52	Rru_A1192	0.00632028	1.44097	0.0965268	1.5925	0.734385	1.06293	0.639861	1.04925	3	Ubiquinol-cytochrome c reductase iron-sulfur subunit
Q2RV51	Rru_A1193	0.01054	2.12846	0.270276	1.54331	0.166075	1.96664	0.129728	2.56126	2	Dinitrogenase iron-molybdenum cofactor biosynthesis
Q2RV48	Rru_A1196	0.0472149	0.867131	0.0216711	0.620306	0.00634411	0.62318	0.397904	0.924091	5	Aspartate-semialdehyde dehydrogenase
Q2RV45	Rru_A1199	0.125116	1.95211	0.143696	2.94487	0.217042	0.731719	0.624374	0.841859	2	Pyridoxal kinase
Q2RV44	Rru_A1200	0.00139314	1.44728	0.017823	1.66816	0.00259302	1.86815	0.106406	1.53389	5	Citrate lyase
Q2RV43	Rru_A1201	0.0149715	1.59112	0.0459951	1.63734	0.000872532	1.48021	0.348271	1.33881	6	MaoC-like dehydratase
Q2RV42	Rru_A1202	0.15315	0.633426	0.140952	0.639262	0.415195	1.5914	0.319971	1.30514	2	Succinate dehydrogenase subunit C
Q2RV40	Rru_A1204	0.00776296	1.51059	0.00053503	1.68056	0.0157923	1.82079	0.00484382	1.55025	6	Succinate dehydrogenase subunit A
Q2RV39	Rru_A1205	0.128797	1.2037	0.0709535	1.40054	0.036426	1.97785	0.0400621	1.54369	5	Succinate dehydrogenase subunit B
Q2RV37	Rru_A1207	0.312649	1.09396	0.371408	1.36009	0.037826	1.35541	0.0761708	1.14799	6	Exopolyphosphatase-related protein
Q2RV36	Rru_A1208	0.128042	0.698892	0.025252	1.36667	0.316702	1.29894	0.272575	0.798018	6	AFG1-like ATPase
Q2RV34	Rru_A1210	#N/A	#N/A	#N/A	#N/A	#N/A	#N/A	#N/A	#N/A	5	Malate dehydrogenase
Q2RV33	Rru_A1211	0.00785808	0.619129	0.576147	0.944953	0.419458	1.18354	0.0202735	0.799615	6	Succinyl-CoA ligase [ADP-forming] subunit beta
Q2RV32	Rru_A1212	0.000803269	0.558316	0.174299	1.26622	0.0931906	1.39693	0.00221565	0.573487	6	Succinyl-CoA ligase [ADP-forming] subunit alpha
Q2RV31	Rru_A1213	0.00770162	1.52774	0.114303	1.27503	0.844848	1.02972	0.120121	1.23754	6	2-oxoglutarate dehydrogenase E1 component
Q2RV30	Rru_A1214	0.00471413	1.66038	0.0156918	1.35224	0.291468	1.07265	0.0457805	1.33001	6	2-oxoglutarate dehydrogenase E2 component
Q2RV29	Rru_A1215	0.00122706	0.721543	0.857773	1.01523	0.0144628	1.25912	0.0292585	0.854423	6	Dihydrolipoyl dehydrogenase
Q2RV28	Rru_A1216	0.0130734	1.83614	0.00477571	0.215329	0.00453249	0.0376296	0.0311298	0.386688	3	Uncharacterized protein
Q2RV27	Rru_A1217	0.0907247	2.29919	0.00893655	0.295297	0.0711273	0.0501536	0.0467238	0.494862	2	Phage shock B
Q2RV26	Rru_A1218	0.0176804	2.83559	0.0249608	0.196557	0.00674504	0.0282984	0.0200797	0.511575	3	Phage shock protein A, PspA
Q2RV25	Rru_A1219	0.0573442	4.16458	0.566987	1.2978	0.0241506	0.160825	0.123598	1.80195	2	Sigma54 Specific Transcriptional Regulator containing PAS, and Fis DNA-binding domains
Q2RV24	Rru_A1220	0.00506797	4.87404	0.00123018	4.28736	0.213745	0.657177	0.578417	0.731022	1	Tyrosine recombinase XerC
Q2RV23	Rru_A1221	0.0941057	1.58772	0.382396	4.11076	0.28908	1.69614	0.686727	0.84913	6	Uncharacterized protein
Q2RV21	Rru_A1223	0.343142	0.92612	0.0598343	0.733381	0.00580067	0.631872	0.0869893	0.806515	2	ATP synthase subunit delta
Q2RV20	Rru_A1224	0.0336533	0.69934	0.00230961	0.339173	0.148391	0.602854	0.00110804	1.26682	6	ATP synthase subunit alpha
Q2RV19	Rru_A1225	0.000191869	0.606879	0.141042	0.627894	0.00864808	0.712405	0.0667878	0.650709	5	ATP synthase gamma chain
Q2RV18	Rru_A1226	0.411821	0.933401	0.018369	0.65235	0.0406992	0.635554	0.342129	0.942223	6	ATP synthase subunit beta
Q2RV17	Rru_A1227	0.00733967	0.328472	0.071321	0.543141	0.045068	0.623241	0.00804216	0.397275	1	ATP synthase epsilon chain
Q2RV16	Rru_A1228	0.0362501	2.58236	0.0104096	4.25642	0.393399	1.08495	0.335975	0.689371	3	Uncharacterized protein
Q2RV14	Rru_A1230	0.15737	1.79544	0.0473317	3.36331	0.587945	1.20866	0.610296	0.894765	3	RNA pyrophosphohydrolase
Q2RV13	Rru_A1231	0.0119539	2.046	0.251981	1.54548	0.740891	0.9545	0.348433	1.21121	6	Uncharacterized protein
Q2RV12	Rru_A1232	3.76827e-05	3.20523	0.00108475	3.44266	0.0792475	0.73113	0.0523204	0.682818	6	C-terminal processing peptidase S41A
Q2RV10	Rru_A1234	0.000365139	2.24715	0.000957775	1.84601	0.825436	0.982463	0.0485223	1.17141	6	2,3-bisphosphoglycerate-independent phosphoglycerate mutase
Q2RV08	Rru_A1236	0.00186032	0.544374	0.238617	1.70823	0.00682147	0.583418	0.0101249	0.284689	2	Iojap-related protein
Q2RV06	Rru_A1238	0.458783	1.32205	0.600707	0.865175	0.566224	0.832646	0.539615	1.28052	2	Gamma-glutamyl phosphate reductase
Q2RV05	Rru_A1239	0.00015119	1.63333	0.908249	1.01105	0.00124415	0.478067	0.0497199	0.835231	6	Glutamate5-kinase
Q2RV04	Rru_A1240	0.362522	1.40785	0.832955	0.954818	0.0420174	0.465375	0.401621	0.759068	2	GTPase obg
Q2RV03	Rru_A1241	0.0907802	0.110812	0.0740569	0.0780421	0.389618	0.399575	0.884897	1.07086	1	50S ribosomal protein L27
Q2RUZ2	Rru_A1252	0.710955	0.79972	0.251612	0.389353	0.976275	1.01318	0.64127	1.34617	1	L-glutamine synthetase
Q2RUZ1	Rru_A1253	0.0417496	1.49606	0.247051	0.737555	0.543105	0.913569	0.200074	1.43007	5	Glutamine synthetase, catalytic region
Q2RUZ0	Rru_A1254	2.58989e-05	0.205072	0.00856937	0.257373	0.26643	0.732545	0.804424	1.03375	5	Aminotransferase
Q2RUY5	Rru_A1259	0.173419	1.41525	0.110972	1.77399	0.479894	1.48486	0.292973	1.16533	1	Uncharacterized protein
Q2RUY2	Rru_A1262	0.908235	1.02403	0.000417776	2.75402	0.00342267	4.20308	0.166059	1.19002	6	Extracellular solute-binding protein, family 1
Q2RUY0	Rru_A1264	0.000241532	2.6583	0.00368906	1.92885	0.0898245	0.874126	0.309971	1.15033	4	Short-chain dehydrogenase/reductase SDR
Q2RUX9	Rru_A1265	0.11768	0.627498	0.383558	0.724438	0.0958469	1.23599	0.325922	0.775215	2	Transcriptional regulator, DeoR family
Q2RUX8	Rru_A1266	0.019992	1.79395	0.585149	0.81055	0.00383408	0.525498	0.656322	1.19282	3	Photosystem I assembly BtpA
Q2RUX7	Rru_A1267	0.0149782	1.70728	0.810434	0.897232	0.346985	0.757952	0.452062	1.5129	4	Carbohydrate kinase, FGGY
Q2RUX4	Rru_A1270	0.0891144	0.393664	0.108039	0.243381	0.541467	0.7163	0.521872	1.3047	2	Uncharacterized protein
Q2RUX1	Rru_A1273	0	0	0.00413739	0	0.0377351	1.74365	#N/A	#N/A	1	Alpha/beta hydrolase fold
Q2RUW8	Rru_A1276	0.181465	1.28031	0.101554	0.797522	0.10323	0.527443	0.304325	0.810594	2	ATP-cone
Q2RUV8	Rru_A1286	0.16664	0.445586	0.0603632	3.85309	0.0453377	4.10359	0.134406	0.378201	1	Uncharacterized protein
Q2RUV7	Rru_A1287	0.139959	1.30212	0.377405	0.708129	0.00919878	0.323574	0.618171	0.857172	2	Trimethylamine-N-oxide reductase (Cytochrome c)
Q2RUV1	Rru_A1293	0.0555277	2.6904	0.192642	1.79988	0.378354	0.830915	0.650289	1.40336	1	Methyl-accepting chemotaxis sensory transducer
Q2RUU9	Rru_A1295	0.019713	1.90428	0.00159875	2.04204	0.27069	1.10629	0.500125	0.914611	6	Extracellular solute-binding protein, family 3
Q2RUU3	Rru_A1301	0.00954034	2.81061	0.838764	0.910858	0.528424	1.16268	0.18713	3.68396	2	Histidineammonia-lyase
Q2RUT8	Rru_A1306	0.000165487	0.324253	0.117312	0.611498	0.126547	1.97747	0.312474	1.08041	4	Short-chain dehydrogenase/reductase SDR
Q2RUT6	Rru_A1308	0.00139586	0.687632	0.350074	2.59787	0.325966	3.02124	0.227263	0.752463	6	Acyl-CoA dehydrogenase
Q2RUT5	Rru_A1309	0.0882751	0.808192	0.21565	3.13749	0.290988	2.87434	0.121292	0.783913	6	3-hydroxyacyl-CoA dehydrogenase
Q2RUT4	Rru_A1310	0.000159332	0.242639	0.442903	2.03043	0.377889	2.63365	0.000125006	0.28294	6	Acetyl-CoA C-acyltransferase
Q2RUT3	Rru_A1311	0.0921559	0.606952	0.141653	0.603694	0.168968	1.86156	0.158187	1.41379	3	Transcriptional regulator, MerR family
Q2RUT2	Rru_A1312	0.0910554	1.39064	0.193786	3.62717	0.228062	2.34143	0.0309241	0.835949	6	AMP-dependent synthetase and ligase
Q2RUT1	Rru_A1313	0.00108702	0.257254	0.22569	2.31362	0.26314	2.90927	0.000537413	0.290517	5	Membrane protein involved in aromatic hydrocarbon degradation
Q2RUT0	Rru_A1314	0.0656454	0.383683	0.734598	0.970528	0.000483721	2.49376	0.804113	0.939641	6	Uncharacterized protein
Q2RUS9	Rru_A1315	0.00437359	3.73689	0.217504	4.20164	0.267593	2.9748	0.275092	2.66178	1	Sterol-binding
Q2RUS8	Rru_A1316	0.138686	1.19147	0.201707	3.09332	0.307251	1.97184	0.0159622	0.696098	6	AMP-dependent synthetase and ligase
Q2RUS7	Rru_A1317	0.039392	1.66953	0.336576	3.31996	0.443771	2.51998	0.813289	0.9471	6	Electron-transferring-flavoprotein dehydrogenase
Q2RUS6	Rru_A1318	0.231464	1.20421	0.0194096	0.414738	0.0408225	0.376824	0.27951	1.14162	1	Uncharacterized protein
Q2RUS5	Rru_A1319	0.157559	0.370488	0.128358	0.023992	0.745699	1.28624	0.411105	1.67504	1	Probable 2-(5''-triphosphoribosyl)-3'-dephosphocoenzyme-A synthase
Q2RUS2	Rru_A1322	0.270648	1.35402	0.360585	0.808892	0.397108	2.71394	0.0422055	1.50514	4	Alpha subunit of malonate decarboxylase
Q2RUS0	Rru_A1324	0.84438	1.20103	0.153444	1.41852	0.556723	0.545914	0.292072	0.354464	2	Beta subunit of malonate decarboxylase
Q2RUR9	Rru_A1325	0.0980421	0.495082	0.0305157	0.402396	0.0409892	0.392329	0.380338	1.24793	3	Uncharacterized protein
Q2RUR8	Rru_A1326	0.0457579	3.0144	0.34115	2.13421	0.301571	1.90683	0.147004	1.66358	5	Uncharacterized protein
Q2RUR7	Rru_A1327	#N/A	#N/A	#N/A	#N/A	0.563117	1.35324	#N/A	#N/A	0	Uncharacterized protein
Q2RUR4	Rru_A1330	0.905705	0.907953	0.152647	2.23232	0.0596848	2.91025	0.387308	0.392523	2	Malonate/sodium symporter MadM subunit
Q2RUR3	Rru_A1331	0.00161603	0.124656	0.119457	0.187908	0.14281	0.111245	0.0276108	0.42024	2	ABC transporter component
Q2RUR2	Rru_A1332	0.72247	1.3052	0.325309	1.77425	0.715494	0.880742	0.185592	0.461326	1	Cobalt transport protein
Q2RUR0	Rru_A1334	0.00602441	2.4587	0.0494468	0.507699	0.076949	0.537422	0.00699665	2.6126	2	Ribose-5-phosphate isomerase
Q2RUQ8	Rru_A1336	0.12267	1.46753	0.832834	0.967301	0.876919	1.02877	0.142039	1.28719	6	Periplasmic binding protein/LacI transcriptional regulator
Q2RUQ7	Rru_A1337	0.000124688	3.751	0.434435	1.37286	0.296107	0.550733	0.26811	2.32841	1	ABC transporter component
Q2RUQ4	Rru_A1340	6.78794e-05	0.4916	0.0187093	0.293728	0.0862482	0.742193	0.307828	1.22539	4	Glycerone kinase
Q2RUQ3	Rru_A1341	0.640686	0.940092	0.0584999	0.562331	0.428763	0.819214	0.159036	1.35865	3	Dak phosphatase
Q2RUQ1	Rru_A1343	0.0108823	3.0763	0.106732	2.01727	0.74436	0.909549	0.429342	1.27789	3	Uncharacterized protein
Q2RUP8	Rru_A1346	0.239009	2.63825	0.0402643	2.94184	0.621029	0.832459	0.280817	1.7557	1	Pentulose kinase
Q2RUP5	Rru_A1349	0.00882268	5.05011	0.0849374	2.90156	0.344409	0.716543	0.866227	1.02872	2	Gamma-glutamyltransferase 2, Threonine peptidase, MEROPS family T03
Q2RUP1	Rru_A1353	0.000928195	0.0911762	0.549311	0.740092	0.0469749	10.6874	0.463064	0.753098	2	Uncharacterized protein
Q2RUP0	Rru_A1354	9.66896e-05	0.208282	0.906785	1.05441	0.123077	2.43993	0.0982725	0.498429	1	Uncharacterized protein
Q2RUN9	Rru_A1355	0.00641364	0.293352	0.0158001	0.445443	0.250276	2.41892	0.243144	0.817909	3	Uncharacterized protein
Q2RUN8	Rru_A1356	0.00376985	0.106131	0.0120226	0.169066	0.763093	1.28685	0.481843	0.880614	1	Catalase
Q2RUN7	Rru_A1357	#N/A	#N/A	#N/A	#N/A	#N/A	#N/A	#N/A	#N/A	5	Transaldolase
Q2RUN6	Rru_A1358	0.000561913	3.09232	0.0440863	0.59633	0.000209774	0.294671	0.0361111	1.7683	4	Triosephosphate isomerase
Q2RUN5	Rru_A1359	#N/A	#N/A	#N/A	#N/A	0.285033	0.457101	#N/A	#N/A	0	Ribose-5-phosphate isomerase
Q2RUN4	Rru_A1360	0.00054264	2.32726	0.0804905	0.70262	0.143004	0.666174	0.0134864	2.26455	5	Dak phosphatase
Q2RUN3	Rru_A1361	0.0949523	1.19131	0.000757334	0.304031	0.00955789	0.404832	0.000483421	1.52908	4	Glycerone kinase
Q2RUN2	Rru_A1362	0.007276	2.29181	0.650427	1.05759	0.0428001	0.600725	0.0552232	1.59863	6	Xylose isomerase-like TIM barrel
Q2RUN0	Rru_A1364	0.0261253	2.22592	0.0319411	0.574224	0.0313665	0.512577	0.0330867	1.86917	6	ABC transporter component
Q2RUM9	Rru_A1365	0.0262809	2.47848	0.0908735	0.788397	0.0136987	0.379433	0.0576214	1.12626	6	Ribose ABC transporter, periplasmic binding protein
Q2RUM8	Rru_A1366	0.313967	0.341991	0.0646724	0.313928	0.504397	1.39628	0.299207	0.321448	1	Transcriptional regulator, DeoR family
Q2RUM7	Rru_A1367	6.95402e-05	0.113166	0.00630262	0.120508	0.869425	0.913395	0.341367	0.871775	2	Hexulose-6-phosphate isomerase
Q2RUL4	Rru_A1380	0.256249	0.372213	0.150056	0.249783	0.416546	0.823157	0.736884	0.813378	5	Acetyl-CoA acetyltransferase
Q2RUL1	Rru_A1383	0.0466956	0.561438	0.22359	0.348233	0.157701	0.741536	0.246689	2.60128	2	Acetate CoA-transferase
Q2RUK8	Rru_A1386	0.775498	1.07206	0.211589	0.206644	0.131585	0.589586	0.676096	1.27474	1	DEAD/DEAH box helicase
Q2RUJ8	Rru_A1396	0.936048	1.03205	0.876112	1.06827	#N/A	#N/A	0.546406	1.19992	1	Methyl-accepting chemotaxis sensory transducer
Q2RUJ1	Rru_A1403	0.104461	0.394568	0.233227	0.108944	0.243532	3.26802	0.518815	1.70016	1	Methyl-accepting chemotaxis sensory transducer
Q2RUI8	Rru_A1406	0.0447898	3.52071	0.0347073	5.71482	0.855936	1.07464	0.181928	0.679995	3	Chemotaxis response regulator protein-glutamate methylesterase 2
Q2RUH7	Rru_A1417	0.00024645	0.59058	0.0767141	0.678451	0.264407	1.23015	0.745435	1.03237	6	Thioredoxin-disulfide reductase
Q2RUH6	Rru_A1418	9.53107e-07	0.106343	0.000174906	0.235588	0.172735	1.59348	0.00224476	0.760669	5	Alkyl hydroperoxide reductase/ Thiol specific antioxidant/ Mal allergen
Q2RUH5	Rru_A1419	0.0246901	4.35342	0.035363	2.44895	0.825458	1.08352	0.278301	1.63928	1	Carboxylyase-related protein
Q2RUG2	Rru_A1432	0.697053	1.11708	0.166201	0.55086	0.689891	0.887223	0.00179302	1.56564	3	Nicotinate-nucleotide pyrophosphorylase (Carboxylating)
Q2RUG1	Rru_A1433	0.0345185	1.72982	0.328084	0.871612	0.0580557	0.446688	0.573411	1.10704	3	L-aspartate oxidase
Q2RUG0	Rru_A1434	0.00661739	2.2441	0.694769	0.926571	0.110469	0.733451	0.0939881	1.55256	3	Quinolinate synthase A
Q2RUF7	Rru_A1437	#N/A	#N/A	#N/A	#N/A	0.165885	0.148319	#N/A	#N/A	0	C4-dicarboxylate transport protein
Q2RUF1	Rru_A1443	0.197462	1.91447	0.945478	0.979961	0.537477	0.818034	0.0757501	1.86064	1	Uncharacterized protein
Q2RUE9	Rru_A1445	0.00592009	4.28363	0.328654	4.33126	0.269078	0.605126	0.067117	0.600996	2	Ribonucleoside-diphosphate reductase subunit beta
Q2RUE8	Rru_A1446	0.159823	1.76428	0.166765	22.4447	0.126501	8.41215	0.19244	0.598592	3	Uncharacterized protein
Q2RUE7	Rru_A1447	0.00609863	2.9755	0.120736	3.81218	0.377491	1.67698	0.817821	1.25147	1	Arsenite-transporting ATPase
Q2RUE4	Rru_A1450	0.000406868	2.6587	0.00652786	4.63937	0.163522	1.31803	0.363167	0.723676	2	Transcriptional regulator, ArsR family
Q2RUE1	Rru_A1453	#N/A	#N/A	#N/A	#N/A	0.269957	1.96556	#N/A	#N/A	0	Phage Tail Collar
Q2RUC9	Rru_A1465	0.244928	1.90082	0.0010687	4.45181	0.000717435	6.25361	0.203478	1.74738	1	Uncharacterized protein
Q2RUC5	Rru_A1469	0.0308616	2.47639	0.161319	2.86859	0.0453787	1.28799	0.901159	0.973744	5	Acetyl-CoA acetyltransferase
Q2RUB5	Rru_A1479	0.0204482	1.5451	0.0117857	1.6933	0.0449828	1.39713	0.0393105	1.27418	6	Uncharacterized protein
Q2RUA7	Rru_A1487	9.31424e-05	0.417578	0.783576	1.0832	0.587783	1.14973	0.0147549	0.461317	1	Polysaccharide export protein
Q2RUA5	Rru_A1489	0.117353	1.43836	0.047149	2.07348	0.165286	1.3774	0.051325	0.657912	5	Uncharacterized protein
Q2RUA4	Rru_A1490	0.0240341	0.628623	0.367443	0.797209	0.115472	0.851335	0.0926914	0.673622	3	Protein-tyrosine kinase
Q2RUA1	Rru_A1493	0.0957824	0.347983	0.147337	0.258888	0.139933	0.696756	0.781604	0.883967	3	UDP-N-acetylglucosamine 2-epimerase
Q2RU94	Rru_A1500	0.0142735	4.69655	0.00452633	7.71364	0.0552818	1.64918	0.566643	0.929026	3	Signal Transduction Histidine Kinase (STHK) with CheB and CheR activity
Q2RU93	Rru_A1501	0.491604	1.50562	0.100212	3.52292	0.589361	0.556814	0.0450754	0.451468	2	Transport-associated
Q2RU91	Rru_A1503	7.23287e-06	3.02335	0.105515	1.66755	0.0029312	0.706729	0.329002	1.11962	5	Zinc-containing alcohol dehydrogenase superfamily
Q2RU90	Rru_A1504	0.195726	0.550695	0.259775	18.328	0.202276	6.67123	0.119446	0.439846	1	UPF0271 protein Rru_A1504
Q2RU87	Rru_A1507	0.0728173	5.60865	0.718125	1.26805	0.146693	4.12882	0.0351456	3.70256	1	Short-chain dehydrogenase/reductase SDR
Q2RU85	Rru_A1509	0.105003	2.17169	0.134029	3.8201	0.0453039	10.3034	0.274265	2.28821	1	Uncharacterized protein
Q2RU74	Rru_A1521	0.0232514	0.270035	0.124754	0.366863	0.713155	1.34251	0.84942	0.936932	1	Cold-shock DNA-binding protein family
Q2RU73	Rru_A1522	0.448404	1.57634	0.184128	0.616852	0.0499025	0.76156	0.121054	2.09682	2	Beta-lactamase-like
Q2RU70	Rru_A1525	0.16588	0.684426	0.167629	0.664699	0.523683	1.23414	0.00200918	1.38021	4	Nucleoside diphosphate pyrophosphatase
Q2RU69	Rru_A1526	0.245563	0.734984	0.20837	0.801932	0.0272529	1.55514	0.209011	1.15172	4	Cobyrinic acid a,c-diamide synthase
Q2RU68	Rru_A1527	0.111361	0.734408	0.00483773	0.484908	0.01249	0.712323	0.608994	1.06387	6	ABC transporter component
Q2RU67	Rru_A1528	0.00536281	0.023719	0.0119745	0.532477	0.002635	1.53227	0.00589518	0.0551158	3	Toluene tolerance
Q2RU66	Rru_A1529	0.00492349	7.49277	0.0159609	4.60571	0.862557	0.961843	0.00872577	1.45693	2	Transcriptional regulator, ArsR family
Q2RU65	Rru_A1530	0.0153442	1.48644	0.143134	0.809599	0.294426	0.849888	0.00253247	1.58611	6	Methylenetetrahydrofolate reductase
Q2RU64	Rru_A1531	0.000581954	6.62351	0.0154688	1.73074	0.177121	0.816347	0.0357831	3.05308	6	Methionine synthase (B12-dependent)
Q2RU63	Rru_A1532	0.00050726	0.201423	0.0245657	0.245757	0.846805	1.02648	0.585144	1.12119	3	TPR repeat
Q2RU62	Rru_A1533	0.000497045	0.390015	0.0228056	0.495506	0.116841	1.83958	0.0656509	1.20202	2	Pentapeptide repeat
Q2RU60	Rru_A1535	0.20498	0.528698	0.0186514	0.201419	#N/A	#N/A	0.0265764	2.38	1	Plasmid maintenance system antidote protein
Q2RU59	Rru_A1536	0.121612	1.23828	0.852333	0.907928	0.067057	0.600719	0.199574	1.29905	3	ATP-dependent DNA helicase, Rep family
Q2RU58	Rru_A1537	0.179021	2.11194	0.211463	6.61523	0.325176	2.49598	0.980212	0.989008	2	Uncharacterized protein
Q2RU56	Rru_A1539	0.386441	1.80559	0.524912	1.75616	0.888917	0.862159	0.713087	0.90101	2	Molybdenum-pterin binding protein
Q2RU54	Rru_A1541	0.222039	0.6081	0.00230156	0.367384	0.0351023	0.724182	0.137871	1.49468	3	Aminotransferase
Q2RU53	Rru_A1542	#N/A	#N/A	#N/A	#N/A	0.928227	0.957884	#N/A	#N/A	0	Methylmalonate-semialdehyde dehydrogenase (Acylating)
Q2RU52	Rru_A1543	0.173424	1.57081	0.852525	1.07233	0.0585603	1.15596	0.834686	1.0497	3	Putative molybdenum utilization protein ModD
Q2RU50	Rru_A1545	0.283502	1.15791	0.029335	0.518801	0.00774854	0.451727	0.871447	1.02836	3	Putative diguanylate cyclase (GGDEF domain)
Q2RU49	Rru_A1546	0.000109579	3.20855	0.27599	2.35419	0.0459781	0.728973	0.656888	0.825408	2	FAD dependent oxidoreductase
Q2RU47	Rru_A1548	8.47541e-06	1.98488	0.0114294	1.87584	0.0580378	1.26622	0.00406665	1.60079	4	Malonyl-CoA decarboxylase
Q2RU46	Rru_A1549	#N/A	#N/A	#N/A	#N/A	#N/A	#N/A	#N/A	#N/A	6	rigger factor
Q2RU44	Rru_A1551	0.000884229	2.03535	0.0066289	2.18702	0.832154	0.972976	0.533243	0.913132	6	ATP-dependent Clp protease ATP-binding subunit ClpX
Q2RU43	Rru_A1552	0.050161	1.23725	0.00605872	1.23836	0.00183276	0.870096	0.185261	0.867013	6	Lon protease
Q2RU42	Rru_A1553	0.000854769	0.0117109	0.0248523	0.0283734	0.592604	1.65479	0.212315	0.781314	2	Histone-like DNA-binding protein
Q2RU41	Rru_A1554	0.00238198	0.421186	0.128656	0.564613	0.225135	0.664782	0.0372447	0.638261	5	Methyl-accepting chemotaxis sensory transducer
Q2RU40	Rru_A1555	#N/A	#N/A	#N/A	#N/A	0.903933	1.04268	#N/A	#N/A	0	NADH-quinone oxidoreductase subunit A
Q2RU39	Rru_A1556	0.246841	1.09907	0.129621	0.884165	0.00391395	1.55434	0.0096258	1.78977	5	NADH-quinone oxidoreductase subunit B
Q2RU38	Rru_A1557	0.00378617	2.06402	0.00236596	1.83727	0.0232812	1.4251	0.0457149	1.58045	6	NADH-quinone oxidoreductase subunit C
Q2RU37	Rru_A1558	0.0464162	1.24816	0.641278	0.92147	0.0567136	1.31588	0.0829458	1.72451	6	NADH-quinone oxidoreductase subunit D
Q2RU36	Rru_A1559	1.02594e-06	0.265273	0.000199952	0.264196	0.0489444	1.62864	0.00240223	1.6165	1	NADH dehydrogenase (Ubiquinone)
Q2RU45	Rru_A155à	0.199503	1.62619	0.26319	0.7883	0.0168169	0.708291	0.136209	1.47523	5	ATP-dependent Clp protease proteolytic subunit
Q2RU35	Rru_A1560	0.00173918	1.71295	0.00158618	1.51488	0.000862142	1.5723	0.00187271	1.72424	6	NADH-quinone oxidoreductase, F subunit
Q2RU34	Rru_A1561	0.00102524	1.9049	0.0100854	1.42529	0.00598685	1.43561	0.000199398	2.06609	5	NADH-quinone oxidoreductase, chain G
Q2RU32	Rru_A1563	0.768056	0.709511	0.434772	0.317449	0.156951	2.1468	0.603656	1.88739	1	NADH-quinone oxidoreductase subunit I
Q2RU29	Rru_A1566	0.0227581	3.56195	0.0466972	2.53255	0.669257	0.784325	0.052096	2.09713	1	NADH-plastoquinone oxidoreductase, chain 5
Q2RU27	Rru_A1568	0.418047	1.2566	0.712957	0.912116	0.354375	1.34712	0.107928	1.62419	1	NADH-quinone oxidoreductase subunit N
Q2RU25	Rru_A1570	0.0986857	4.94944	0.339077	2.88173	#N/A	#N/A	0.137199	2.03498	1	Type IIIpantothenate kinase
Q2RU24	Rru_A1571	0.000133273	3.34057	0.00298406	1.55975	0.0217883	0.656229	0.000920884	1.37142	5	Metallo-beta-lactamase
Q2RU23	Rru_A1572	0.00275879	3.27493	0.0194897	3.12054	0.348552	1.30053	0.0100029	1.66548	5	Methylmalonyl-CoA epimerase
Q2RU19	Rru_A1576	#N/A	#N/A	#N/A	#N/A	#N/A	#N/A	#N/A	#N/A	5	roline--tRNA ligase
Q2RU18	Rru_A1577	0.00118413	4.58805	0.00376467	2.91815	0.129045	0.78291	0.220282	1.18742	2	ThiJ/PfpI
Q2RU16	Rru_A1579	1.53422e-05	5.40655	0.784301	1.19937	0.011617	0.574543	0.330768	3.91694	3	Lipoprotein-releasing system ATP-binding protein LolD 1
Q2RU15	Rru_A1580	0.332413	0.677181	0.627109	0.686979	0.850541	0.866575	0.568912	0.71232	1	GCN5-related N-acetyltransferase
Q2RU13	Rru_A1582	0.00813677	2.08516	0.123601	1.69441	0.0340719	0.769279	0.814026	1.09092	5	DNA polymerase III, alpha subunit
Q2RU12	Rru_A1583	0.12078	0.252629	0.255614	0.410906	0.517265	1.15172	0.3588	0.582095	5	Chemotaxis sensory transducer
Q2RU10	Rru_A1585	0.194623	1.35005	0.00521281	5.78342	0.013376	5.99112	0.593988	1.13727	4	Putative depolymerase
Q2RQX2	Rru_A1586	#N/A	#N/A	#N/A	#N/A	#N/A	#N/A	#N/A	#N/A	6	0S ribosomal protein L5
Q2RU08	Rru_A1587	6.28847e-05	1.94303	0.223806	1.12882	0.00948992	0.66094	0.236649	1.12868	6	Elongation factor Ts
Q2RU07	Rru_A1588	6.59375e-05	1.59766	0.0110106	1.48332	0.536121	0.962764	0.427527	1.06861	6	Uridylatekinase
Q2RU06	Rru_A1589	0.000545902	0.125313	0.00853068	0.158504	0.189973	1.48704	0.308143	0.871466	4	Ribosome-recycling factor
Q2RU05	Rru_A1590	0.0028256	10.2066	0.0114946	4.31528	0.331577	0.774126	0.450164	1.65992	1	Isoprenyl transferase
Q2RU03	Rru_A1592	0.00722491	1.84991	0.797779	0.956902	0.995959	1.00103	0.0380939	1.73474	2	1-deoxy-D-xylulose 5-phosphate reductoisomerase
Q2RU01	Rru_A1594	0.000701013	3.24348	0.078821	1.58386	0.21493	0.800992	0.172714	1.59928	6	Outer membrane protein assembly factor BamA
Q2RU00	Rru_A1595	0.00177979	0.684824	0.0321023	0.487166	0.0320548	0.650241	0.759952	0.958762	6	Outer membrane chaperone Skp (OmpH)
Q2RTZ9	Rru_A1596	0.851912	1.093	0.232578	0.261741	0.208814	0.194102	0.0510541	0.282464	1	3-hydroxyacyl-[acyl-carrier-protein] dehydratase FabZ
Q2RTZ8	Rru_A1597	0.287686	2.6229	0.26578	0.266405	#N/A	#N/A	0.208578	8.64525	1	Acyl-[acyl-carrier-protein]--UDP-N-acetylglucosamine O-acyltransferase
Q2RTZ6	Rru_A1599	0.00125702	4.28714	0.162404	1.61002	0.647613	0.907949	0.0368046	2.43546	1	Lipid-A-disaccharide synthase
Q2RTZ5	Rru_A1600	0.00274331	5.67487	0.0125811	3.93686	0.0426887	1.51483	0.0164427	1.99041	5	Citrate synthase
Q2RTZ4	Rru_A1601	1.4402e-05	5.18334	0.00674691	2.20385	0.0471488	0.745903	0.104625	1.7877	6	Glutamate--tRNA ligase 2
Q2RTZ1	Rru_A1604	0.0136101	2.27242	0.0395073	2.38887	0.642259	1.11094	0.894777	1.04378	5	Alpha-1,4-glucan:maltose-1-phosphate maltosyltransferase
Q2RTZ0	Rru_A1605	0.0180635	3.76306	0.0136355	2.79403	0.107279	1.51495	0.162482	2.00158	6	Alpha amylase, catalytic region
Q2RTY9	Rru_A1606	0.00788707	0.443932	0.537616	0.7525	0.347545	0.843812	0.896475	0.98502	2	Glycogen debranching enzyme GlgX
Q2RTY8	Rru_A1607	0.00181743	2.92942	0.00235022	3.08768	0.00681286	1.59982	0.0921899	1.44839	6	4-alpha-glucanotransferase
Q2RTY7	Rru_A1608	0.0543422	0.556579	0.3542	0.793723	0.392668	0.854923	0.0592308	0.570238	2	MscS Mechanosensitive ion channel
Q2RTY4	Rru_A1611	0.00172814	2.43411	0.293048	3.70302	#N/A	#N/A	0.0698313	0.476242	1	Cobalamin synthesis protein/P47K
Q2RTY3	Rru_A1612	0.487643	0.242756	0.738242	0.667443	0.281252	1.24627	0.652294	0.492544	2	Phosphoribosyl-AMP cyclohydrolase
Q2RTY2	Rru_A1613	0.0446016	1.52995	0.0166868	0.648553	0.114279	0.71532	0.0134306	1.49013	4	Cystathionine beta-lyase
Q2RTY0	Rru_A1615	0.0135921	3.02686	0.0549926	3.11201	0.378175	1.40438	0.15628	1.51075	5	Sulfurtransferase
Q2RTX8	Rru_A1617	0.0101052	1.59152	0.0774341	1.4833	0.91036	1.02054	0.323041	1.14779	5	Uncharacterized protein
Q2RTX5	Rru_A1620	0.215174	0.802304	0.596887	0.870912	0.0372409	2.058	0.466337	1.22118	3	Uncharacterized protein
Q2RTX2	Rru_A1623	0.00350985	0.535938	0.312622	0.755802	0.519004	1.17347	0.0576784	1.22407	5	Amino acid-binding ACT
Q2RTW8	Rru_A1627	#N/A	#N/A	#N/A	#N/A	0.223321	1.80165	#N/A	#N/A	0	Uncharacterized protein
Q2RTV3	Rru_A1642	0.072335	1.15351	0.00253777	2.11581	0.290477	1.07094	0.00174203	0.577308	5	Putative sulfonate/nitrate transport system substrate-binding protein
Q2RTV0	Rru_A1645	0.0133678	2.55984	0.71114	0.890622	0.25647	0.648326	0.163902	1.862	2	Uncharacterized protein
Q2RTU9	Rru_A1646	0.0033828	0.216788	0.00315246	0.322862	0.486342	1.36695	0.76974	1.03391	3	ETC complex I subunit conserved region
Q2RTU8	Rru_A1647	0.0914387	1.38779	0.136051	1.54521	0.339946	1.25776	0.798877	0.948119	1	Uncharacterized protein
Q2RTU2	Rru_A1653	0.785955	1.10364	0.829951	1.05047	0.00478106	0.527914	0.176971	0.747252	2	Guanylate cyclase (GGDEF domain) with PAS/PAC sensor and Response Regulator
Q2RTU1	Rru_A1654	0.356461	0.773173	0.00804776	0.499927	0.436698	1.24066	0.0684756	1.52456	3	Response regulator receiver domain protein (CheY)
Q2RTT9	Rru_A1656	0.00200225	0.292443	0.0722312	0.259243	0.438824	0.576412	0.316113	1.47211	3	Uncharacterized protein
Q2RTT7	Rru_A1658	0.00254533	3.08359	0.0371093	1.96601	0.696999	0.935516	0.0412271	1.34551	6	AMP-dependent synthetase and ligase
Q2RTT2	Rru_A1663	0.00173447	3.06419	0.0124928	2.1132	0.333373	0.824647	0.519398	1.17343	1	Ubiquinol-cytochrome C chaperone
Q2RTT1	Rru_A1664	4.75837e-07	0.350784	0.0752083	0.551615	0.886294	0.989705	0.0467279	0.630189	5	Conserved hypothetical cytosolic protein
Q2RTT0	Rru_A1665	0.00177154	0.0800916	0.0631486	0.064686	0.986476	0.988709	0.490347	0.821553	2	50S ribosomal protein L32
Q2RTS9	Rru_A1666	0.951097	1.02788	0.45292	0.774866	0.442138	0.875376	0.715332	1.19435	6	Phosphate acyltransferase
Q2RTS8	Rru_A1667	0.24275	0.816877	0.356268	0.85836	0.0643235	1.41525	0.390324	1.13131	5	3-oxoacyl-[acyl-carrier-protein] synthase 3
Q2RTS7	Rru_A1668	0.0414886	0.73337	0.051414	0.611637	0.564293	1.15083	0.20607	1.18611	4	Integration host factor subunit alpha
Q2RTS6	Rru_A1669	0.000217283	2.2701	0.0878566	1.30714	0.0242525	0.708697	0.0891919	1.19062	2	Transcriptional regulator, MerR family
Q2RTS1	Rru_A1674	0.148434	0.647512	0.0269085	0.405177	0.0436432	0.657745	0.191425	1.36535	5	Bifunctional enzyme IspD/IspF
Q2RTR8	Rru_A1677	0.376205	0.404064	0.705186	0.834654	0.233137	0.944484	0.448608	0.487228	1	Signal transduction histidine kinase, nitrogen specific, NtrB
Q2RTR7	Rru_A1678	0.00768263	1.53127	0.379833	1.52359	0.00190102	0.531657	0.87192	1.03715	4	Nitrogen metabolism transcriptional regulator, NtrC, Fis family
Q2RTR5	Rru_A1680	0.00173913	3.1934	0.00114683	2.31006	0.130037	0.792645	0.31006	1.18688	5	Two component, sigma54 specific, transcriptional regulator, Fis family
Q2RTR3	Rru_A1682	0.00711822	1.4723	0.0394924	0.725346	0.0123595	0.590689	0.000252405	1.21045	5	Branched chain amino acid: 2-keto-4-methylthiobutyrate aminotransferase
Q2RQW5	Rru_A1683	0.556246	1.16146	0.0691695	0.690999	0.0679319	0.482989	0.518453	0.913756	2	50S ribosomal protein L22
Q2RTR2	Rru_A1683	#N/A	#N/A	#N/A	#N/A	0.204856	0.305137	#N/A	#N/A	0	HAD-superfamily hydrolase, subfamily IA, variant 1
Q2RTR1	Rru_A1684	#N/A	#N/A	#N/A	#N/A	#N/A	#N/A	#N/A	#N/A	2	rotein hfq
Q2RTR0	Rru_A1685	0.000843724	1.73211	0.00344097	1.69019	0.00705362	0.701734	0.0727553	0.761121	2	GTPaseHflX
Q2RTQ8	Rru_A1687	0.0111985	0.666723	0.782933	0.921161	0.398986	1.15216	0.316081	0.799353	4	Inositol monophosphatase
Q2RTQ6	Rru_A1689	1.56999e-05	0.185161	0.0117631	0.16779	#N/A	#N/A	0.541855	1.10092	1	Uncharacterized protein
Q2RTQ5	Rru_A1690	2.37903e-06	2.82735	0.0532159	1.57119	0.0371131	0.748432	0.0154573	1.30678	6	MazG
Q2RTQ4	Rru_A1691	0.120434	1.21645	0.709297	0.79087	0.174124	0.794101	0.751778	1.21471	5	Spermidine synthase
Q2RTQ3	Rru_A1692	0.0238232	0.534688	0.344145	0.842369	0.506659	0.816669	0.0268535	0.512988	2	S-adenosylmethionine decarboxylase proenzyme
Q2RTQ1	Rru_A1694	#N/A	#N/A	#N/A	#N/A	0.965258	0.977561	#N/A	#N/A	0	Uncharacterized protein
Q2RTQ0	Rru_A1695	0.000679019	0.110679	0.164093	0.232365	0.388795	1.7224	0.219936	0.613949	3	Uncharacterized protein
Q2RTP6	Rru_A1699	0.0378315	1.5019	0.695229	1.14752	0.346406	0.815851	0.427435	0.883115	2	Beta-lactamase-like
Q2RTP5	Rru_A1700	0.0734433	1.14273	0.0837009	0.739972	0.30524	0.907016	0.0930695	1.32898	4	TatD-related deoxyribonuclease
Q2RTP4	Rru_A1701	0.016424	1.72306	0.000259269	1.55574	0.0947103	0.66879	0.0172151	0.771112	6	Methionine--tRNA ligase
Q2RTP3	Rru_A1702	0.00200057	11.5633	0.00694497	5.18831	0.90697	0.980309	0.261476	1.6049	2	DNA polymerase III, delta prime subunit
Q2RTP2	Rru_A1703	0.127574	1.26647	0.265207	1.4812	0.995765	0.999706	0.760739	0.897134	2	Thymidylate kinase
Q2RTP1	Rru_A1704	0.751539	0.951661	0.00353669	0.419762	0.117043	0.580605	0.000783788	1.45922	6	Serine-type D-Ala-D-Ala carboxypeptidase
Q2RTP0	Rru_A1705	0.342897	1.58384	0.60873	1.33889	0.324141	1.17993	0.909643	1.06871	2	Rare lipoprotein A
Q2RTN9	Rru_A1706	0.00263517	2.77427	0.00128652	3.13833	0.995246	1.00091	0.268535	0.773346	5	Lytic murein transglycosylase
Q2RTM7	Rru_A1718	0.00523892	0.639139	0.224084	1.40467	0.506273	1.1618	0.00212227	0.543294	6	5-methyltetrahydropteroyltriglutamate--homocysteine methyltransferase
Q2RTM6	Rru_A1719	0.00147982	0.555451	0.393077	0.736514	0.557528	1.2438	0.0876668	0.866936	4	Thioesterase superfamily
Q2RTM5	Rru_A1720	0.177042	0.526905	0.0235621	0.228154	0.526772	1.29024	0.125612	1.53435	1	Carboxymuconolactone decarboxylase
Q2RTI1	Rru_A1724	0.111538	2.78671	0.00153277	2.48586	0.174465	0.553175	0.36448	1.393	1	Protein translocase subunit SecD
Q2RTM1	Rru_A1724	0.061849	0.717529	0.0758046	0.886153	0.00824193	1.97363	0.00565312	1.5753	5	ThiJ/PfpI
Q2RTM0	Rru_A1725	#N/A	#N/A	#N/A	#N/A	0.61895	0.789895	#N/A	#N/A	0	Carbonate dehydratase
Q2RTL7	Rru_A1728	5.55236e-05	3.76442	0.00879645	2.77159	0.000359766	0.728038	0.978609	0.990404	1	ATP-dependent DNA helicase RecG
Q2RTL5	Rru_A1730	0.149722	0.372165	0.282559	0.552101	0.546747	1.15441	0.384372	1.55194	1	Nuclease
Q2RTL4	Rru_A1731	0.322649	1.9766	0.769951	1.34109	#N/A	#N/A	0.920574	0.946148	1	Uncharacterized protein
Q2RTL2	Rru_A1733	0.384905	0.800469	0.656934	1.33905	0.572487	1.13894	0.553212	0.67571	1	Uncharacterized protein
Q2RTL0	Rru_A1735	0.000252168	0.555592	0.0182649	0.460895	0.200242	0.672205	0.0244798	0.813614	5	Uncharacterized protein
Q2RTK3	Rru_A1742	0.965308	0.990465	0.250171	0.82446	0.0781064	1.77443	0.0848952	1.54452	5	Peptidyl-prolyl cis-trans isomerase
Q2RTK1	Rru_A1744	5.58481e-05	2.78731	0.0476799	1.42812	0.0498276	0.695088	0.0188599	1.4456	5	DNA gyrase subunit A
Q2RTK0	Rru_A1745	0.00186701	0.416425	0.000642662	0.25808	0.270599	0.526181	0.00863913	1.24316	4	Single-stranded DNA-binding protein
Q2RTJ9	Rru_A1746	0.000552031	0.330015	0.105796	0.729675	0.0113611	3.09012	0.357186	1.13922	6	Extracellular ligand-binding receptor
Q2RTJ7	Rru_A1748	0.00184981	0.639775	0.0103977	0.545994	0.656375	0.925911	0.601147	0.964607	5	ABC transporter component
Q2RTJ6	Rru_A1749	0.000839571	1.8848	0.0840578	1.45172	0.759022	0.966371	0.222457	1.21287	6	ABC transporter component
Q2RTJ5	Rru_A1750	0.229255	0.262646	0.0933417	0.369921	0.688956	0.864864	0.628349	0.727399	1	Inner-membrane translocator
Q2RTJ3	Rru_A1752	0.0138538	0.275174	0.0291047	0.395515	0.296762	0.84047	0.197148	0.740829	3	UvrABCsystem protein A
Q2RTI9	Rru_A1756	0.00231002	0.356778	0.00451236	0.294227	0.590812	0.778873	0.845746	1.02136	3	Uncharacterized protein
Q2RTI8	Rru_A1757	0.00210188	1.48362	0.693383	0.96146	0.00874967	0.728615	0.110314	1.20878	5	Methylenetetrahydrofolate--tRNA-(uracil-5-)-methyltransferase TrmFO
Q2RTI6	Rru_A1759	0.0153474	0.769982	0.0156418	0.408331	0.682026	0.950027	0.14283	1.30784	1	Putative phytoene synthase protein
Q2RTI5	Rru_A1760	0.035733	0.609193	0.131543	1.29512	0.0659844	1.92267	0.343791	0.938713	6	Superoxide dismutase
Q2RTI4	Rru_A1761	3.25728e-07	0.149854	0.006503	0.154965	0.516993	1.21271	0.151444	1.22281	6	GCN5-related N-acetyltransferase
Q2RTI3	Rru_A1762	0.000450151	0.287167	0.00739437	0.268494	0.736793	1.11402	0.294336	1.16602	2	Uncharacterized protein
Q2RTI0	Rru_A1765	0.00704642	0.510479	0.00656498	0.42406	0.0485916	0.39126	0.00130348	0.543372	2	Protein translocase subunit yajC
Q2RTH9	Rru_A1766	0.0321374	0.44282	0.0395261	0.445185	0.3117	0.786061	0.416565	0.857063	5	Uncharacterized protein
Q2RTH8	Rru_A1767	0.893263	0.963079	0.267776	0.636367	0.438203	1.13507	0.252161	1.6079	2	Peptidase M23B
Q2RTH6	Rru_A1769	0.000330856	3.29611	0.000310248	4.84972	0.101743	0.817393	0.209151	0.613126	3	5'-nucleotidase SurE
Q2RTH5	Rru_A1770	#N/A	#N/A	#N/A	#N/A	#N/A	#N/A	#N/A	#N/A	6	erine--tRNA ligase
Q2RTH4	Rru_A1771	0.00730572	6.62708	0.0723601	3.47636	0.283985	0.655077	0.831948	1.10041	1	Sec-independent protein translocase TatC
Q2RTH2	Rru_A1773	0.446971	1.06548	0.0322536	0.554052	0.0166313	0.54082	0.364259	1.05768	1	Sec-independent protein translocase protein TatA
Q2RTH1	Rru_A1774	0.0423983	1.87123	0.53721	0.634342	0.169156	0.481852	0.313251	2.31633	2	Condensin subunit ScpB
Q2RTG8	Rru_A1777	0.000721219	2.74385	0.556506	1.08086	0.305264	1.09578	0.00484665	2.46352	4	Beta-N-acetylhexosaminidase
Q2RTG7	Rru_A1778	0.0139574	1.39867	0.758952	1.0787	0.357242	1.2036	0.149522	1.56921	3	Uncharacterized protein
Q2RTG6	Rru_A1779	#N/A	#N/A	#N/A	#N/A	#N/A	#N/A	#N/A	#N/A	6	rginine--tRNA ligase
Q2RTG5	Rru_A1780	0.113477	0.476046	0.0112659	0.47004	0.0699601	0.686573	0.357279	0.740865	3	Deoxyguanosinetriphosphate triphosphohydrolase-like protein
Q2RTG4	Rru_A1781	0.00430497	0.497883	0.0881087	0.427996	0.707776	0.935979	0.842883	1.04752	2	HesB/YadR/YfhF
Q2RTG3	Rru_A1782	0.930282	0.980033	0.977115	0.983996	0.0832058	1.88667	0.708252	1.22248	3	Copper/Zinc superoxide dismutase
Q2RTG1	Rru_A1784	0.37202	0.678644	0.0226205	0.213976	0.253679	0.460471	0.84545	1.06395	1	Exodeoxyribonuclease III
Q2RTG0	Rru_A1785	0.0584131	0.312316	0.511351	0.632446	0.889746	0.931521	0.124715	0.429979	2	Membrane protein-like
Q2RTF9	Rru_A1786	0.00107548	1.72045	0.0252466	1.47494	0.473004	0.919586	0.643846	1.04349	6	Dihydroxy-acid dehydratase
Q2RTF6	Rru_A1789	0.0496426	1.87264	0.105172	2.82156	0.116483	2.45652	0.304674	1.35349	6	Cytochrome-c peroxidase
Q2RTF0	Rru_A1795	0.0390444	9.04545	0.445455	1.61597	0.783273	0.867349	0.291536	4.62918	1	HAD-superfamily hydrolase, subfamily IIA
Q2RTE9	Rru_A1796	0.115081	0.817304	0.180946	1.19157	0.0668154	0.629136	0.00141229	0.499331	6	Valine--tRNA ligase
Q2RTE7	Rru_A1798	0.05838	1.58211	0.0187469	1.67013	0.44537	0.887195	0.363262	0.846577	6	Type I secretion outer membrane protein, TolC
Q2RTE6	Rru_A1799	0.0917522	1.63118	0.00241984	1.83936	0.00813803	1.6059	0.0285301	1.3897	3	Protein-L-isoaspartate(D-aspartate) O-methyltransferase
Q2RTE3	Rru_A1802	0.990964	0.998314	0.149873	0.43497	0.0131424	0.432003	0.774846	0.919279	1	Chemotaxis sensory transducer
Q2RTE1	Rru_A1804	0.0306327	1.3011	0.405347	1.13567	0.417146	0.854066	0.534947	0.904525	6	N-acetyltransferase
Q2RTE0	Rru_A1805	0.00492748	0.298265	0.0481531	0.244324	0.429825	0.586708	0.192388	0.710329	1	Diguanylate cyclase/phosphodiesterase with PAS/PAC sensor(S)
Q2RTD9	Rru_A1806	0.0917004	1.69885	0.943227	0.975371	0.163003	0.62211	0.853144	1.08398	1	MotA/TolQ/ExbB proton channel
Q2RTD8	Rru_A1807	0.0511838	1.58891	0.941686	0.960469	0.155208	0.644961	0.921381	1.05458	1	OmpA/MotB
Q2RTD3	Rru_A1812	0.665989	1.40941	0.000794977	9.97995	0.78965	0.877106	0.363776	0.64711	1	Uncharacterized protein
Q2RTD2	Rru_A1813	0.0295139	1.59764	0.877607	0.971165	0.266788	1.09242	0.10693	1.5186	5	Peptidase M20D, amidohydrolase
Q2RTD1	Rru_A1814	0.0153896	0.386601	0.552806	0.746582	0.148244	1.54562	0.0323757	0.632679	2	Carbon monoxide dehydrogenase subunit G
Q2RTC8	Rru_A1817	0.0105532	3.37496	0.0132065	9.1395	0.0895046	1.7376	0.428309	0.54544	1	TPR repeat
O68460	Rru_A1818	2.45558e-05	0.125839	0.00480577	0.21299	0.77428	1.06994	0.0316617	0.713492	5	K(+)-insensitive pyrophosphate-energized proton pump
Q2RTC4	Rru_A1821	0.00144183	0.0252803	0.00276107	0.0258522	#N/A	#N/A	0.161766	0.83411	1	N utilization substance protein B homolog
Q2RTC3	Rru_A1822	0.0799856	1.53742	0.337227	0.906251	0.441566	0.834272	0.00962799	1.4416	4	6,7-dimethyl-8-ribityllumazine synthase
Q2RTC2	Rru_A1823	0.00553416	1.48094	0.783484	1.0523	0.130149	0.789353	0.0666275	1.15799	4	GTP cyclohydrolase II
Q2RTC1	Rru_A1824	0.00084359	1.67378	0.0257807	0.758846	0.233172	0.888526	0.00274092	1.74085	4	Lumazine-binding protein
Q2RTB9	Rru_A1826	0.51912	1.29009	0.0331859	0.626544	0.464367	0.836685	0.162944	1.69006	2	Transcriptional repressor NrdR
Q2RTB8	Rru_A1827	0.0385144	0.860634	0.0623618	0.751846	0.418208	0.822764	0.30444	0.908629	6	Serine hydroxymethyltransferase 2
Q2RTB7	Rru_A1828	0.0247089	1.54514	0.35909	1.12686	0.193658	0.735984	0.860835	1.01927	3	Ribose-5-phosphate isomerase
Q2RTB6	Rru_A1829	0.0755579	0.750121	0.0662669	0.245864	0.00173323	0.356103	0.758108	1.08621	2	Transcriptional regulator, MucR family
Q2RTB5	Rru_A1830	0.41772	1.31283	0.446142	1.78159	0.410876	1.83796	0.922392	1.0224	1	Uncharacterized protein
Q2RTB2	Rru_A1833	0.00115157	4.59936	0.0206548	3.72452	0.721076	0.83665	0.00906266	2.68561	3	3-hydroxyisobutyrate dehydrogenase
Q2RTB1	Rru_A1834	0.367345	0.825471	0.223238	0.709615	0.420175	1.16223	0.0953807	1.26374	2	Enoyl-CoA hydratase/isomerase
Q2RTB0	Rru_A1835	0.476871	0.791374	0.564913	0.863072	0.0142942	1.96974	0.140771	1.48849	4	Butyryl-CoA dehydrogenase
Q2RTA9	Rru_A1836	0.0238557	1.17028	0.596704	0.947684	0.672392	0.982039	0.238041	1.15903	6	O-acetylhomoserine/O-acetylserine sulfhydrylase
Q2RTA8	Rru_A1837	0.00841862	1.79421	0.752975	0.963985	0.105504	0.700926	0.634093	1.06253	5	Delta-aminolevulinic acid dehydratase
Q2RTA7	Rru_A1838	0.0496006	2.06108	0.000694332	1.97423	0.738104	1.15585	0.211766	1.16694	6	Alpha/beta hydrolase fold
Q2RTA6	Rru_A1839	0.313266	2.63731	0.121226	3.59844	0.235868	2.22365	0.97114	1.00896	2	TRAP-type C4-dicarboxylate transport system periplasmic component-like
Q2RTA4	Rru_A1841	0.0201928	3.10702	0.00610657	1.81696	0.0195309	1.6608	0.0110333	2.40868	1	Flavin reductase-like, FMN-binding
Q2RTA3	Rru_A1842	#N/A	#N/A	#N/A	#N/A	0.451168	0.705179	#N/A	#N/A	0	MotA, chemotaxis (motility protein A)
Q2RTA0	Rru_A1845	#N/A	#N/A	#N/A	#N/A	#N/A	#N/A	#N/A	#N/A	1	Putative arginyl-tRNA--protein transferase
Q2RT99	Rru_A1846	0.155333	0.410191	0.0639313	0.289704	0.579748	1.5641	0.75045	1.13413	1	Twin-arginine translocation pathway signal
Q2RT97	Rru_A1848	0.192696	1.36889	0.0133382	1.6773	0.0501846	1.45249	0.258135	1.21135	3	DNA topoisomerase IV subunit A
Q2RT94	Rru_A1851	0.295776	0.824436	0.17528	0.487001	0.233253	0.533215	0.857919	1.03736	1	GTPaseEra
Q2RT92	Rru_A1853	0.0827975	0.660744	0.0241047	0.65742	0.176823	0.561382	0.65433	0.95281	3	Signal peptidase I
Q2RT91	Rru_A1854	0.0715174	1.44505	0.186652	0.806212	0.513178	1.06559	0.0404745	1.65606	1	Pyridoxine 5'-phosphate synthase
Q2RT89	Rru_A1856	0.00162742	1.91528	0.479522	1.22768	0.0702621	0.790496	0.258597	1.16798	5	(P)ppGpp synthetase I (GTP pyrophosphokinase), SpoT/RelA
Q2RT88	Rru_A1857	0.655337	0.958646	0.0109693	0.515923	0.0964541	0.68492	0.051046	1.43018	4	DNA-directed RNA polymerase subunit omega
Q2RT87	Rru_A1858	0.0882238	0.711567	0.333851	1.36514	0.889737	1.00998	0.0549406	0.505771	2	7, 8-Dihydro-6-hydroxymethylpterin-pyrophosphokinase, HPPK
Q2RT86	Rru_A1859	0.0394819	4.50858	0.0465184	3.51187	0.784375	0.782998	0.6125	0.85712	2	Uncharacterized protein
Q2RT81	Rru_A1864	0.000310898	0.00355047	0.176361	0.00896614	0.967083	0.9651	0.197525	0.524886	1	SsrA-binding protein
Q2RT80	Rru_A1865	4.14057e-07	2.99666	0.0363051	1.31666	0.0010748	0.597696	0.00701401	1.39147	6	4-hydroxy-tetrahydrodipicolinate synthase
Q2RT79	Rru_A1866	0.111904	0.754755	0.942915	1.01146	0.825111	1.07212	0.137773	0.781242	6	Lytic transglycosylase, catalytic
Q2RT78	Rru_A1867	0.00321529	0.455559	0.0122851	0.333548	0.0822627	0.78271	0.520715	1.09212	5	Uncharacterized protein
Q2RT75	Rru_A1870	0.00221318	0.168714	0.0281077	0.175884	0.862287	0.903348	0.579923	1.04657	2	CinA-like
Q2RT73	Rru_A1872	0.426308	1.63572	0.13895	2.70043	0.36007	1.88209	0.633158	1.65775	1	Transcriptional regulator, TetR family
Q2RT69	Rru_A1876	0.755317	1.26943	0.475557	0.608016	0.789074	0.802087	0.694474	0.738144	1	Cyclase/dehydrase
Q2RT68	Rru_A1877	7.60989e-05	5.57694	0.0484733	1.98535	0.156225	0.752298	0.263725	1.72928	5	Lipoyl synthase
Q2RT67	Rru_A1878	4.04771e-05	2.33372	0.0713592	1.69566	0.390239	0.874693	0.103568	1.19892	5	Dihydrolipoyl dehydrogenase
Q2RT66	Rru_A1879	0.00547716	1.41769	0.562081	1.11583	0.29827	0.8165	0.728381	1.02742	6	Dihydrolipoamide acetyltransferase, long form
Q2RT65	Rru_A1880	8.00524e-06	2.40483	0.0721522	1.91896	0.322344	0.849442	0.35947	1.07834	6	Pyruvate dehydrogenase beta subunit
Q2RT64	Rru_A1881	0.0400864	1.62704	0.22017	1.46219	0.991765	0.99742	0.92119	0.975369	4	Pyruvate dehydrogenase (Lipoamide)
Q2RT62	Rru_A1883	0.79675	1.10921	0.331093	1.65109	0.583237	1.13863	0.615487	0.735061	1	Magnesium and cobalt transport protein CorA
Q2RT60	Rru_A1885	0.0157495	2.58956	0.0371138	2.66534	0.342618	1.21981	0.49495	1.02915	6	Enolase
Q2RT59	Rru_A1886	0.194171	1.52399	0.304784	2.5859	0.118875	0.766368	0.193183	0.481124	3	2-dehydro-3-deoxyphosphooctonate aldolase
Q2RT58	Rru_A1887	0.0247367	2.80964	0.0152907	2.02455	0.682793	0.929809	0.481374	0.915971	5	CTP synthase
Q2RT57	Rru_A1888	0.0701954	1.48012	0.0254235	0.657329	0.0874447	0.505229	0.0989797	1.18947	1	Protein translocase subunit secG
Q2RT56	Rru_A1889	0.00536063	2.32892	0.00469314	2.26753	0.0403705	1.47524	0.00401259	1.34095	6	Triosephosphate isomerase
Q2RT55	Rru_A1890	0.0205427	0.565329	0.0854944	0.196262	0.200842	0.760796	0.154728	2.24453	3	Uncharacterized protein
Q2RT54	Rru_A1891	0.00545316	0.608137	0.327925	0.7322	0.0767558	0.790036	0.153729	0.692487	4	Anthranilate synthase, component I
Q2RT53	Rru_A1892	0.0048092	0.192486	0.0517672	0.166523	0.0268687	2.42602	0.0849458	2.60062	2	Heavy metal transport/detoxification protein
Q2RT51	Rru_A1894	0.0318651	4.23773	0.00810552	3.73459	0.122255	1.3455	0.0937483	1.90047	1	Heavy metal translocating P-type ATPase
Q2RT50	Rru_A1895	0.471272	0.471392	0.0298953	0.578642	0.127298	0.749984	0.620244	0.645223	3	Anthranilate synthase, component II
Q2RT49	Rru_A1896	0.00716727	1.99689	0.0681588	1.31465	0.229843	0.853187	0.00788106	1.38328	5	Anthranilate phosphoribosyltransferase
Q2RT48	Rru_A1897	0.0781509	0.548689	0.0724228	0.542066	0.839419	0.90806	0.183882	1.3219	2	Indole-3-glycerol phosphate synthase
Q2RT47	Rru_A1898	0.0378407	2.89109	0.093715	2.17987	0.490866	1.20755	0.783574	1.1594	1	LexA repressor
Q2RT44	Rru_A1901	0.745054	0.772717	0.805113	1.22192	0.631898	1.23483	0.899933	0.882446	2	Chemotaxis sensory transducer
Q2RT43	Rru_A1902	1.08486e-05	0.430983	2.61512e-05	0.488804	0.0120558	1.38461	0.0269133	1.11433	6	Basic membrane lipoprotein
Q2RT39	Rru_A1906	0.187573	0.711726	0.589482	0.730429	0.469182	2.62785	0.992139	1.00359	1	Sulfate transporter/antisigma-factor antagonist
Q2RT38	Rru_A1907	0.00146897	0.562588	0.06616	0.453207	0.0111031	2.31208	0.0517383	2.73576	5	Protein-methionine-S-oxide reductase
Q2RT36	Rru_A1909	0.00246436	2.55087	0.0034039	2.20032	0.0054202	2.26803	0.00488446	2.34953	6	Uncharacterized protein
Q2RT35	Rru_A1910	0.0176371	2.67792	0.0118349	3.63214	0.679045	1.10027	0.506358	0.811746	2	Cyclopropane-fatty-acyl-phospholipid synthase
Q2RT33	Rru_A1912	0.000342254	2.62789	0.0285452	2.28998	0.161641	1.25085	0.246759	1.27538	6	Short-chain dehydrogenase/reductase SDR
Q2RT32	Rru_A1913	0.449623	0.823839	0.136891	0.683435	0.462211	1.63291	0.0914254	1.33798	1	Uncharacterized protein
Q2RT31	Rru_A1914	0.00867502	0.06167	0.148585	0.175506	0.760169	1.11385	0.0273083	0.370593	1	Cold-shock DNA-binding protein family
Q2RT29	Rru_A1916	0.115743	0.606425	0.43483	1.22418	0.0364368	6.19243	0.0537489	2.427	4	Ferredoxin
Q2RT28	Rru_A1917	0.000453131	1.40907	0.113886	0.747073	0.893185	0.986015	0.0434923	1.77682	6	Extracellular solute-binding protein, family 5
Q2RT18	Rru_A1927	0.00164033	3.38177	0.183039	0.682242	0.0159627	0.352315	0.00963141	2.32774	6	Acetyl-CoA hydrolase
Q2RT17	Rru_A1928	0.0427321	3.75377	0.00283518	0.187264	0.0515426	0.050076	0.134517	1.24956	6	2-isopropylmalate synthase
Q2RT15	Rru_A1930	0.104619	1.53053	0.191015	2.20471	0.510167	1.31712	0.845056	0.949643	1	Uncharacterized conserved protein UCP030820
Q2RT14	Rru_A1931	0.0836163	0.493536	0.00911809	0.384345	0.095526	0.562154	0.374605	0.781458	6	Ferredoxin--nitrite reductase
Q2RT13	Rru_A1932	0.0450808	0.23018	0.0241808	0.494449	0.338258	1.45717	0.299747	0.706559	2	Uncharacterized protein
Q2RT11	Rru_A1934	0.0923098	0.69691	0.232733	0.697503	0.281216	1.51668	0.443282	1.20855	2	Transcriptional regulator, TetR family
Q2RT04	Rru_A1941	0.0132086	0.365882	0.429502	1.84597	0.195014	3.89926	0.0751437	0.646059	4	3-methylcrotonoyl-CoA carboxylase, alpha subunit
Q2RT03	Rru_A1942	0.193926	0.40245	0.112831	3.65246	0.124106	4.99636	0.2906	0.541055	2	Methylglutaconyl-CoA hydratase
Q2RT02	Rru_A1943	0.314112	1.52091	0.0470302	2.69578	0.13132	3.29958	0.264371	2.197	2	Propionyl-CoA carboxylase
Q2RT01	Rru_A1944	0.655077	0.919382	0.262659	2.30266	0.169597	5.03969	0.551234	1.18976	4	DSBA oxidoreductase
Q2RT00	Rru_A1945	0.000338396	0.437305	0.107099	0.653561	0.0042353	2.16604	0.523787	1.10887	5	Short-chain dehydrogenase/reductase SDR
Q2RSZ9	Rru_A1946	0.224769	1.68698	0.0474834	1.70299	0.00534812	2.62533	0.340203	1.17516	5	Acetyl-CoA C-acetyltransferase
Q2RSZ8	Rru_A1947	0.024641	2.2617	0.111738	2.43297	0.303003	1.57308	0.00182197	1.55512	1	Nucleotidyltransferase-like
Q2RSZ7	Rru_A1948	0.26995	0.544984	0.704179	0.877494	0.0346803	3.13713	0.765354	0.905629	2	Isovaleryl-CoA dehydrogenase
Q2RSZ6	Rru_A1949	0.00250352	2.5523	0.0341712	1.239	0.0872176	0.742474	0.00618493	1.59775	2	Uncharacterized protein
Q2RSZ5	Rru_A1950	0.043407	2.74657	0.451782	1.56088	0.459863	1.41698	0.929416	0.94832	1	Transcriptional regulator, ModE family
Q2RSX5	Rru_A1970	0.121132	0.572174	0.691489	0.723122	0.516362	0.596013	0.198893	0.56848	1	PTS fructose IIC component
Q2RSX4	Rru_A1971	0.124918	3.49574	0.277846	3.81179	0.190812	0.665149	0.973864	1.01288	1	PfkB
Q2RSX3	Rru_A1972	0.0322956	3.82282	0.0429398	3.41187	0.288131	1.45573	0.111102	1.44785	4	Phosphoenolpyruvate--protein phosphotransferase
Q2RSX1	Rru_A1974	0.961987	1.01489	0.692967	1.15261	0.0176102	2.11167	0.291521	1.85869	2	Uncharacterized protein
Q2RSW9	Rru_A1976	0.0110873	2.68869	0.0165353	1.69567	0.0524845	2.69786	0.000703784	3.01151	2	Phenylacetate-CoA ligase
Q2RSW8	Rru_A1977	0.00966746	3.43006	0.0234561	3.12845	0.0320545	4.86376	0.0181478	3.12985	2	Pyruvate ferredoxin/flavodoxin oxidoreductase
Q2RSW7	Rru_A1978	0.833878	1.15515	0.388255	1.31706	0.0241214	3.32163	0.0490117	2.02447	6	Indolepyruvate ferredoxin oxidoreductase
Q2RSW6	Rru_A1979	0.0101631	0.713258	0.00737616	0.482159	0.413901	0.867206	0.0609284	1.3814	5	Tryptophan synthase beta chain
Q2RSW3	Rru_A1982	0.00158958	0.356258	0.00457572	0.513935	0.0902447	1.47842	0.998463	0.999822	4	SEC-C domain protein
Q2RSW2	Rru_A1983	0.119822	2.7232	0.560472	2.3521	0.74841	0.822207	0.452297	0.58115	1	Uncharacterized protein
Q2RSV8	Rru_A1987	0.00905891	3.67094	0.0892195	1.55702	0.338589	1.23607	0.0165307	2.40335	1	Peptidase M42
Q2RSV7	Rru_A1988	0.332222	4.97494	0.066484	11.5806	0.206329	0.142691	0.792755	0.888711	1	GCN5-related N-acetyltransferase
Q2RSV6	Rru_A1989	0.984487	1.00714	0.7931	0.884176	0.488478	1.28819	0.464603	0.721895	3	Asparagine synthetase
Q2RSV3	Rru_A1992	0.173799	4.55164	0.0665534	2.69604	0.183619	2.47707	0.0680579	5.97587	2	Arsenate reductase
Q2RSV1	Rru_A1994	#N/A	#N/A	#N/A	#N/A	0.174163	1.85758	#N/A	#N/A	0	Transcriptional regulator, MerR family
Q2RSU7	Rru_A1998	0.23291	1.48835	0.00601458	1.72549	0.180746	1.66709	0.0381928	1.22805	2	Ribulose-1,5-bisphosphate carboxylase/oxygenase large subunit
Q2RSU5	Rru_A2000	0.00988163	3.75258	0.0276329	3.66759	0.685341	0.904562	0.947831	1.01796	4	Uncharacterized protein
Q2RSU4	Rru_A2001	0.761815	0.943134	0.00674903	2.29733	0.141154	1.26105	0.0259144	0.571895	3	Uncharacterized protein
Q2RSU3	Rru_A2002	0.277523	1.43593	0.441228	0.918138	0.357083	0.621421	0.158378	1.15428	2	D-isomer specific 2-hydroxyacid dehydrogenase, NAD-binding
Q2RSU0	Rru_A2005	0.0191749	2.43064	0.891146	1.05089	0.476775	0.882772	0.216083	2.25872	3	Glutaryl-CoA dehydrogenase
Q2RST9	Rru_A2006	0.417597	1.249	0.0610587	1.96113	0.915078	1.03909	0.495237	0.807439	4	L-carnitine dehydratase/bile acid-inducible protein F
Q2RST7	Rru_A2008	0.466203	1.18691	0.155423	0.824865	0.413642	0.796635	0.0174179	1.25542	6	Phosphomethylpyrimidine synthase
Q2RST6	Rru_A2009	0.000508101	2.44951	0.00815116	1.73054	0.379534	0.939898	0.0879501	1.46579	4	Glycerolkinase
Q2RST5	Rru_A2010	0.000838388	2.6551	0.72652	1.01865	0.0858948	0.595608	0.000953759	1.61653	2	Aminotransferase, class V
Q2RST4	Rru_A2011	0.52926	0.827701	0.663635	0.789936	0.106953	0.530259	0.835481	0.911093	4	ABC transporter component
Q2RST1	Rru_A2014	2.476e-06	3.25715	0.143597	1.2712	0.0138283	0.584789	0.023942	1.48959	6	Twin-arginine translocation pathway signal
Q2RST0	Rru_A2015	0.017755	0.407868	0.114819	0.395154	0.18671	0.404583	0.377176	1.38406	4	Chaperone DnaJ
Q2RSS9	Rru_A2016	2.34686e-05	2.36659	0.00899555	1.7328	0.75308	1.02332	0.11754	1.39655	2	Uncharacterized protein
Q2RSS2	Rru_A2023	0.643321	1.13743	0.48628	0.811416	0.00120596	0.380571	0.188236	0.5784	1	Methyl-accepting chemotaxis sensory transducer
Q2RSS1	Rru_A2024	#N/A	#N/A	#N/A	#N/A	0.261961	0.394564	#N/A	#N/A	0	tRNA-specific 2-thiouridylase MnmA
Q2RSS0	Rru_A2025	0.026118	2.96119	0.0441497	3.1681	0.308088	1.29117	0.643592	1.35424	1	Transcriptional activator, TenA family
Q2RSR9	Rru_A2026	0.444417	0.685929	0.0885552	0.529732	0.855999	1.11798	0.0923825	1.8318	1	Ferredoxin
Q2RSR7	Rru_A2028	0.000367153	5.78896	0.00523007	4.08832	0.489343	1.07705	0.0582025	1.26341	5	Transcriptional regulator, BadM/Rrf2 family
Q2RSR6	Rru_A2029	0.00157148	0.120319	0.0212531	0.00174641	0.381687	0.702312	0.0115414	0.552544	1	Serine acetyltransferase
Q2RSR5	Rru_A2030	0.000172667	0.39521	5.87908e-05	0.304606	0.419325	0.814101	0.359271	1.06038	2	Uncharacterized protein
Q2RSR4	Rru_A2031	0.327364	1.30628	0.11985	1.96407	0.892011	1.03461	0.761423	0.867885	1	Anhydro-N-acetylmuramic acid kinase
Q2RSR3	Rru_A2032	0.000938803	2.36618	0.149042	1.591	0.074174	0.745622	0.714745	1.13475	6	Tyrosine--tRNA ligase
Q2RSQ7	Rru_A2038	2.26652e-05	0.514253	0.0296725	0.690496	0.0009184	1.61023	0.115164	1.20802	3	Glutamate-ammonia-ligase adenylyltransferase
Q2RSQ5	Rru_A2040	0.00236181	0.3253	0.00618614	0.30991	0.0355252	0.194029	0.0199898	0.676934	2	Bacterial peptide chain release factor 2 (BRF-2)
Q2RSQ4	Rru_A2041	0.68954	0.951502	0.00814297	0.494062	0.568704	0.911552	0.00781167	1.73321	6	Aminotransferase
Q2RSP8	Rru_A2047	0.933557	1.01305	0.127465	1.26758	0.0615264	1.86357	0.917231	1.01823	4	Extracellular solute-binding protein, family 1
Q2RSP7	Rru_A2048	0.928254	1.02741	0.0271113	0.524896	0.0693363	0.491532	0.701417	1.11832	3	ABC transporter component
Q2RSP5	Rru_A2050	0.0025751	2.4825	0.273593	0.416528	0.903636	1.0346	0.262598	2.49792	6	Secretion protein HlyD
Q2RSP4	Rru_A2051	0.260511	1.38187	0.772089	1.12788	0.755447	0.903805	0.788306	0.901247	2	Hydrophobe/amphiphile efflux-1 HAE1
Q2RSP3	Rru_A2052	6.83749e-05	0.171225	0.355931	0.343258	0.168253	1.54128	0.188089	0.484115	2	RND efflux system, outer membrane lipoprotein, NodT
Q2RSP1	Rru_A2054	0.154161	3.7496	0.314246	3.48809	0.28354	3.52473	0.463928	1.73159	1	Hpt domain protein
Q2RSP0	Rru_A2055	0.000359732	1.75664	0.54329	1.10876	0.000386972	0.388598	0.00565374	0.612686	3	Peptidase S49
Q2RSN9	Rru_A2056	0.0762604	1.75435	0.0157561	1.38387	0.0575304	0.748832	0.265515	1.19599	4	Carbonic anhydrase
Q2RSN8	Rru_A2057	7.05987e-05	2.9775	0.00688863	1.50515	0.00645674	0.633355	0.249439	1.22408	3	Molybdopterin-guanine dinucleotide biosynthesis MobB region
Q2RSN5	Rru_A2060	0.00168202	0.430863	0.0292024	0.442311	0.500013	0.848466	0.676462	0.937359	2	FAD linked oxidase
Q2RSN4	Rru_A2061	0.00111549	0.0926788	0.0108883	0.364645	0.0909657	4.61188	0.188415	0.826461	4	Uncharacterized protein
Q2RSN3	Rru_A2062	#N/A	#N/A	#N/A	#N/A	0.332148	3.93213	#N/A	#N/A	0	Uncharacterized protein
Q2RSN1	Rru_A2064	0.819815	1.12002	0.015963	3.56576	0.680907	1.07846	0.276002	0.36324	1	FAD dependent oxidoreductase
Q2RSN0	Rru_A2065	0.259615	0.332311	0.00476002	0.345334	0.833394	1.13664	0.992052	1.00525	1	Proline racemase
Q2RSM9	Rru_A2066	0.000561419	0.384492	0.787781	0.836464	0.501942	1.14629	0.321726	1.30474	2	Dihydrodipicolinate synthetase
Q2RSM7	Rru_A2068	0.0887606	1.69364	0.561223	0.75038	0.0412824	0.679587	0.350231	1.78467	1	Methylglyoxal synthase
Q2RSM6	Rru_A2069	0.344239	0.822823	0.291144	0.601959	0.0133509	0.652582	0.6282	0.861971	2	Uncharacterized protein
Q2RSM5	Rru_A2070	0.742232	1.19104	0.0209619	1.7101	0.0486998	1.55481	0.939611	1.04361	2	FAD dependent oxidoreductase
Q2RSM4	Rru_A2071	0.0282343	2.25459	0.013614	1.92932	0.285526	0.761433	0.693977	1.04824	6	Methylmalonate-semialdehyde dehydrogenase (Acylating)
Q2RSM3	Rru_A2072	#N/A	#N/A	#N/A	#N/A	#N/A	#N/A	#N/A	#N/A	6	spartate--tRNA ligase
Q2RSM2	Rru_A2073	0.00415587	2.76996	0.000290036	1.9463	0.194373	0.875751	0.0328041	1.29789	6	Ribonuclease D
Q2RSM1	Rru_A2074	0.121939	0.704925	0.53399	0.723496	0.675233	0.895969	0.998842	0.999372	2	Thiosulphate-binding protein
Q2RSM0	Rru_A2075	0.000157391	1.67832	0.0137325	1.3249	0.106407	1.20934	0.00227224	1.53877	6	O-acetylhomoserine/O-acetylserine sulfhydrylase
Q2RSL9	Rru_A2076	0.0765757	0.397497	0.860563	1.04498	0.0373963	3.39718	0.969988	1.01109	2	Chemotaxis sensory transducer
Q2RSL7	Rru_A2078	0.00781748	3.72618	0.0455772	2.08304	0.0227265	0.333464	0.10811	0.631505	2	Chemotaxis sensory transducer
Q2RSL6	Rru_A2079	0.0450521	1.75516	0.879467	0.918316	0.00153755	0.511849	0.474215	1.70765	6	L-glutamine synthetase
Q2RSL5	Rru_A2080	#N/A	#N/A	#N/A	#N/A	0.814468	0.943622	#N/A	#N/A	0	Uncharacterized protein
Q2RSL3	Rru_A2082	0.0134197	0.670314	0.289192	0.743832	0.613388	0.888803	0.388508	0.841436	1	Hemerythrin HHE cation binding region
Q2RSL2	Rru_A2083	0.142884	0.793479	0.0902543	0.878276	0.00356082	1.65584	0.00690444	1.27579	3	CreA
Q53044	Rru_A2085	0.00127493	0.325505	0.0314061	0.284514	0.746902	0.843484	0.958713	1.01016	2	Nitrogen regulatory protein P-II
Q2RSK9	Rru_A2086	0.000376968	0.57881	0.00349578	0.498319	0.924014	1.0134	0.177792	1.13751	6	Glutamine synthetase
Q2RSK8	Rru_A2087	0.722519	1.04366	0.0227829	1.59898	0.0070899	2.12463	0.0187462	1.27347	4	Extracellular solute-binding protein, family 3
Q2RSK5	Rru_A2090	#N/A	#N/A	#N/A	#N/A	0.558137	2.4931	#N/A	#N/A	0	ABC transporter component
Q2RSK1	Rru_A2094	0.094511	5.19943	0.00926983	6.5429	0.923785	1.06989	0.699524	0.756993	1	Acriflavin resistance protein
Q2RSK0	Rru_A2095	0.0648568	0.525207	0.90369	0.965139	0.190397	0.750026	0.294504	0.742463	2	Secretion protein HlyD
Q2RSJ9	Rru_A2096	0.00161446	3.38786	0.000457983	2.83267	0.0676744	0.70813	0.793665	0.970923	6	Cell divisionFtsK/SpoIIIE
Q2RSJ8	Rru_A2097	0.689434	1.13834	0.227075	1.70944	0.405407	1.2509	0.293149	0.581195	3	Uncharacterized protein
Q2RSJ4	Rru_A2101	0.586793	0.697381	0.281885	0.298203	0.756483	1.05664	0.334343	2.56133	1	Two component, sigma54 specific, transcriptional regulator, Fis family
Q2RSJ2	Rru_A2103	0.550501	0.822466	0.0726508	1.27447	0.612228	1.06696	0.3538	0.718975	3	L-carnitine dehydratase/bile acid-inducible protein F
Q2RSI9	Rru_A2106	2.32459e-06	0.278128	0.0141843	0.438127	0.146059	1.74348	0.637123	1.04032	3	Uncharacterized protein
Q2RSI8	Rru_A2107	0.00107418	4.85844	0.0621068	3.31936	0.129515	1.312	0.748323	1.28962	1	23S rRNA (Uracil-5-)-methyltransferase RumA
Q2RSI7	Rru_A2108	#N/A	#N/A	#N/A	#N/A	0.722957	0.879719	#N/A	#N/A	0	Hpt sensor hybrid histidine kinase
Q2RSI6	Rru_A2109	0.00481401	2.9245	0.0343744	2.62043	0.50027	0.840473	0.435908	0.844574	6	ATP-dependent Clp protease ATP-binding subunit ClpA
Q2RSI5	Rru_A2110	0.0659933	0.319874	0.0376619	0.337771	0.413024	0.72318	0.397686	0.738006	2	ATP-dependent Clp protease adaptor protein ClpS
Q2RSI4	Rru_A2111	0.000406286	0.249779	0.0540928	2.60662	0.030335	28.8156	0.108716	2.04738	6	Uncharacterized protein
Q2RSI3	Rru_A2112	0.00104938	3.50345	0.083778	1.42567	0.061151	0.708193	0.140093	1.61519	2	Uncharacterized protein
Q2RSI0	Rru_A2115	0.000377899	1.77196	0.0925616	1.38074	0.19195	1.2065	0.00323952	1.4878	6	Phosphoglucomutase/phosphomannomutase
Q2RSH9	Rru_A2116	0.0777062	1.1653	0.0548742	0.817152	0.357783	0.926468	0.015053	1.31658	5	UDP-glucose 6-dehydrogenase
Q2RSH8	Rru_A2117	0.000623153	1.92857	0.0187165	2.46052	0.257841	0.864991	0.00691482	0.70708	5	UDP-glucose pyrophosphorylase
Q2RSH6	Rru_A2119	0.0348271	2.24056	0.520143	1.43505	0.205014	0.556912	0.982858	0.998108	5	Molybdopterin oxidoreductase
Q2RSH2	Rru_A2123	0.0762548	2.61264	0.00288418	9.92822	0.539716	1.74446	0.296455	0.211828	1	Uncharacterized protein
Q2RSH1	Rru_A2124	0.153245	0.816217	0.134595	3.83102	#N/A	#N/A	0.978044	1.0121	1	Glycosyl transferase, family 2
Q2RSG9	Rru_A2126	0.158802	1.26362	0.544806	0.919422	0.082741	0.878821	0.610374	1.07951	3	5-oxopent-3-ene-1,2,5-tricarboxylate decarboxylase
Q2RSG8	Rru_A2127	0.0323795	0.753048	0.0296651	0.536755	0.558007	1.09268	0.103164	1.38276	4	Serine 3-dehydrogenase
Q2RSG6	Rru_A2129	0.31884	1.39548	0.000571124	2.45274	0.727531	1.13513	0.503403	1.13923	3	Fumarate hydratase class II
Q2RSG2	Rru_A2133	0.00243723	3.5573	0.673742	1.31325	0.589677	0.897749	0.464044	2.33786	2	Glycosyl transferase, group 2 family protein
Q2RSG0	Rru_A2135	0.00395668	3.95181	0.0115258	2.2418	0.99035	1.00128	0.0262432	1.65873	6	Twin-arginine translocation pathway signal
Q2RSF5	Rru_A2140	0.0272924	1.9279	0.13337	1.30031	0.821301	0.980109	0.243238	1.40523	1	Transcriptional regulator, XRE family
Q2RSF3	Rru_A2142	0.515716	0.628546	0.306207	1.63611	0.177095	0.636158	0.240127	0.262306	3	Chemotaxis sensory transducer
Q2RSE8	Rru_A2147	0.0226815	2.39008	0.0492167	1.90168	0.897168	0.984046	0.292442	1.14369	4	Penicillin-binding protein 1A
Q2RSE7	Rru_A2148	0.000277857	2.96945	0.0184583	2.46802	0.205459	1.21793	0.104711	1.41391	2	N-acetylmuramoyl-L-alanine amidase
Q2RSE6	Rru_A2149	0.00253658	5.10154	0.0268591	3.76224	0.250047	0.746387	0.988393	0.997585	6	RNAse E
Q2RSE5	Rru_A2150	0.335727	1.82421	0.819147	1.11348	0.712609	0.784251	0.0646721	2.10224	1	Uncharacterized protein
Q2RSE4	Rru_A2151	#N/A	#N/A	#N/A	#N/A	#N/A	#N/A	#N/A	#N/A	1	0S ribosomal protein S9
Q2RSE3	Rru_A2152	0.000363989	0.490704	0.00722264	0.309835	0.0681011	0.62974	0.874584	0.981892	4	50S ribosomal protein L13
Q2RSD9	Rru_A2156	0.00872274	1.36407	0.447692	1.06233	0.487984	1.03695	0.0494619	1.28462	5	Short chain enoyl-CoA hydratase
Q2RSD7	Rru_A2158	0.0328742	0.526274	0.709215	0.913211	0.0679221	1.90797	0.194284	0.723214	2	Two component, sigma54 specific, transcriptional regulator, Fis family
Q2RSD6	Rru_A2159	0.0118472	0.657529	0.000984704	0.207144	0.0392716	0.372768	0.0156313	1.28984	3	Creatininase
Q2RSD5	Rru_A2160	#N/A	#N/A	#N/A	#N/A	0.322983	0.442315	#N/A	#N/A	0	Ppx/GppA phosphatase
Q2RSD4	Rru_A2161	0.000702494	4.91302	0.0139326	2.51494	0.558283	0.880543	0.00291389	1.93976	6	Polyphosphate kinase
Q2RSD2	Rru_A2163	#N/A	#N/A	#N/A	#N/A	0.282275	2.76283	#N/A	#N/A	0	Regulatory inactivation of DnaA Hda protein
Q2RSD1	Rru_A2164	#N/A	#N/A	#N/A	#N/A	0.654751	1.13404	#N/A	#N/A	0	Uncharacterized protein
Q2RSC9	Rru_A2166	0.00120036	2.70283	0.0206913	3.07542	0.527918	1.15278	0.56331	1.15631	5	Uncharacterized protein
Q2RSC8	Rru_A2167	0.00129055	1.55706	0.00160021	1.49196	0.317117	0.918462	0.893276	1.01197	3	Phosphoribosylformylglycinamidine cyclo-ligase
Q2RSC7	Rru_A2168	0.000458366	0.438492	0.103752	0.575563	0.350828	1.35209	0.715272	0.936753	2	Phosphoribosylglycinamide formyltransferase
Q2RSC6	Rru_A2169	#N/A	#N/A	#N/A	#N/A	#N/A	#N/A	#N/A	#N/A	4	Nucleoside diphosphate kinase
Q2RSC5	Rru_A2170	0.475773	1.17628	0.126543	0.369897	0.373122	0.762926	0.183539	1.92588	4	ABC transporter component
Q2RSC4	Rru_A2171	0.317889	1.27841	0.0322829	3.06288	0.00683439	4.24383	0.0192653	1.54018	6	Extracellular ligand-binding receptor
Q2RSC2	Rru_A2173	0.437025	1.22911	0.678757	0.918869	0.074973	0.675289	0.506864	1.22417	4	Leucyl aminopeptidase
Q2RSB7	Rru_A2178	0.992845	1.00113	0.00735459	3.3302	0.135774	1.52151	0.0971508	0.550792	3	Extracellular solute-binding protein, family 5
Q2RSB5	Rru_A2180	0.112863	0.558599	0.154909	0.687537	0.739098	1.15338	0.812709	1.04883	4	Peptidase S33, tricorn interacting factor 1
Q2RSB4	Rru_A2181	0.00398035	2.30223	0.00319694	1.73658	0.860266	0.973276	0.222865	1.20638	4	NAD(P) transhydrogenase subunit beta
Q2RSB2	Rru_A2183	0.539698	0.903726	0.0450541	0.523528	0.304085	0.816283	0.151808	1.36589	4	NAD(P) transhydrogenase subunit alpha part 1
Q2RSB0	Rru_A2185	0.666505	1.24154	0.714574	0.915269	0.821225	1.13959	0.42713	1.19003	2	Pyruvate ferredoxin/flavodoxin oxidoreductase
Q2RSA4	Rru_A2191	0.0276813	1.81099	0.0399711	1.69727	0.259317	0.668514	0.524319	1.07742	6	AMP-dependent synthetase and ligase
Q2RSA3	Rru_A2192	1.18268e-05	3.22414	0.0163015	1.65809	0.01455	0.724278	0.025871	1.46779	6	Peptidase M3B, oligoendopeptidase-related clade 3
Q2RSA2	Rru_A2193	0.182191	1.26554	0.511567	1.18142	0.724593	0.918079	0.162683	1.28376	6	Abc1 protein
Q2RSA0	Rru_A2195	0.00646812	13.3623	0.00319522	15.579	0.0561368	0.825624	0.114071	0.796636	2	Bacterioferritin
Q2RS97	Rru_A2198	0.790364	0.937505	0.903948	0.946002	#N/A	#N/A	0.64567	1.17122	1	Uncharacterized protein
Q2RS94	Rru_A2201	0.306868	1.2084	0.030238	0.747168	0.0470247	0.634519	0.125204	1.19467	6	Peptidase S1C, Do
Q2RS93	Rru_A2202	0.00833913	2.15447	0.00152145	1.41268	0.444602	0.818646	0.125222	1.16971	6	HflC
Q2RS92	Rru_A2203	0.00567075	3.17414	0.0106646	2.14701	0.0587028	0.688978	0.398294	1.11934	6	HflK
Q2RS91	Rru_A2204	0.0156317	3.11554	0.000271067	2.56388	0.348051	0.886559	0.0225616	1.35977	4	Uncharacterized protein
Q2RS89	Rru_A2206	0.0111299	2.03172	0.832259	0.97252	0.145873	0.790737	0.00113679	1.72248	6	Fumarase
Q2RS88	Rru_A2207	0.846046	1.1406	0.653018	0.58633	0.615257	0.930824	0.950803	1.06832	1	Uncharacterized protein
Q2RS87	Rru_A2208	0.0039972	0.329898	0.0413499	0.409917	0.957612	1.02412	0.210878	1.25175	3	Uncharacterized protein
Q2RS85	Rru_A2210	0.389438	0.864552	0.0167674	1.60892	0.501705	1.0847	0.00533997	0.624625	3	Phosphoglycerate/bisphosphoglycerate mutase
Q2RS84	Rru_A2211	0.00204814	0.310556	0.458504	0.858395	0.792406	0.945252	0.00292183	0.361783	6	Porin, Gram-negative type
Q2RS83	Rru_A2212	0.00723871	0.66416	0.0917738	1.38896	0.142972	1.28506	0.0021885	0.656341	5	Uncharacterized protein
Q2RS82	Rru_A2213	0.0709369	7.14816	0.209508	2.49925	0.232776	1.21502	0.36344	3.61041	3	Sulfotransferase
Q2RS79	Rru_A2216	#N/A	#N/A	#N/A	#N/A	0.868687	0.854175	#N/A	#N/A	0	Uncharacterized protein
Q2RS77	Rru_A2218	0.00500762	8.46761	0.0488236	3.61726	#N/A	#N/A	0.211325	1.99304	1	Short-chain dehydrogenase/reductase SDR
Q2RS73	Rru_A2222	0.00133825	3.89731	0.00228156	2.42118	0.133188	0.749597	0.104771	1.17059	5	Molybdopterin molybdochelatase
Q2RS72	Rru_A2223	0.0016227	2.63223	0.0806837	1.67507	0.216201	0.796306	0.0491918	1.8724	6	Branched chain amino acid: 2-keto-4-methylthiobutyrate aminotransferase
Q2RS64	Rru_A2231	0.0261867	3.76545	0.657736	1.39388	0.372918	0.552633	0.567746	1.96768	1	Glycosyl transferase, family 25
Q2RS63	Rru_A2232	0.000886392	0.500437	0.00488841	0.730581	0.62944	0.887509	0.00355401	0.550224	3	Two component transcriptional regulator, LuxR family
Q2RS62	Rru_A2233	5.30181e-07	0.326984	1.42291e-05	0.231452	0.647413	0.94896	0.00277603	1.24279	4	Transcriptional regulatory protein
Q2RS61	Rru_A2234	0.617584	1.06885	0.580618	0.910913	0.193795	1.32502	0.011375	1.42355	3	Response regulator receiver domain protein (CheY)
Q2RS60	Rru_A2235	0.0182902	0.0218263	0.0814045	0.202879	0.484465	0.569862	0.0617533	0.41308	1	Multi-sensor signal transduction histidine kinase
Q2RS59	Rru_A2236	0.646865	0.853271	0.681139	1.09479	0.410178	0.927577	0.0854296	0.567496	4	UspA
Q2RS56	Rru_A2239	0.00299458	0.638665	0.559904	1.04832	0.00681226	2.27054	0.0892852	1.15916	6	TRAP dicarboxylate transporter-DctP subunit
Q2RS55	Rru_A2240	0.0737304	0.671343	0.446684	1.14524	0.0624661	2.50616	0.205214	1.28607	3	Short chain enoyl-CoA hydratase / Enoyl-CoA hydratase
Q2RS53	Rru_A2242	0.0461689	1.63779	0.0927282	1.58859	0.0298009	2.06021	0.0654713	1.68152	5	Glutathione-dependent formaldehyde-activating, GFA
Q2RS51	Rru_A2244	0.00241667	3.56691	0.000205987	2.75264	0.787568	1.04854	0.108191	1.33556	6	Phosphorylase
Q2RS50	Rru_A2245	0.00274547	2.85024	0.00391127	2.24797	0.375441	0.885148	0.149944	1.15081	6	Glycogensynthase
Q2RS49	Rru_A2246	0.08828	1.4952	0.0912394	1.28664	0.0157551	0.827815	0.31701	1.15034	5	Glucose-1-phosphate adenylyltransferase
Q2RS47	Rru_A2248	#N/A	#N/A	#N/A	#N/A	0.466875	0.358342	#N/A	#N/A	0	Uncharacterized protein
Q2RS46	Rru_A2249	5.90529e-05	3.26673	0.0028574	2.25487	0.0351826	0.790058	0.577608	1.10599	5	L-threonine aldolase
Q2RS44	Rru_A2251	0.472024	0.810901	0.179501	2.23289	0.00647049	3.08908	0.598016	1.06706	4	Extracellular solute-binding protein, family 3
Q2RS40	Rru_A2255	0.0377264	1.37023	0.582801	1.0527	0.655882	0.923605	0.0822102	1.27887	4	Uracilphosphoribosyltransferase
P00144	Rru_A2256	0.774507	1.10486	0.972785	0.992489	0.0323065	2.78581	0.0371628	2.69645	6	Cytochrome c'
Q2RS38	Rru_A2257	0.112371	1.38199	0.227283	1.34231	0.142717	0.481116	0.221143	0.715379	2	Transcriptional regulator, LysR family
Q2RS37	Rru_A2258	0.653748	0.95063	0.00529213	0.524312	0.953632	0.991046	0.00258254	1.79656	5	Uncharacterized protein
Q2RS35	Rru_A2260	0.00251228	0.645041	0.0101845	0.556636	0.541032	1.07635	0.0300572	1.40439	2	Uncharacterized protein
Q2RS31	Rru_A2264	0.000912356	0.296548	0.011005	0.319384	0.0388898	3.97475	0.0197569	2.90633	5	Ferredoxin
Q2RS30	Rru_A2265	0.319069	0.820019	0.146732	0.736372	0.0255211	2.99498	0.0184004	2.97148	5	Electron transfer flavoprotein-ubiquinone oxidoreductase
Q2RS29	Rru_A2266	0.50617	1.17336	0.0609429	1.62898	0.0451247	3.18072	0.0314286	2.0871	6	Electron transfer flavoprotein
Q2RS28	Rru_A2267	0.0848112	2.45364	0.0437448	2.43488	0.067912	2.35905	0.0148896	2.46247	5	Electron transfer flavoprotein beta-subunit
Q2RS06	Rru_A2289	0.656303	1.06421	0.0839209	0.750192	0.532416	0.938966	0.225502	1.21628	4	Sulfate adenylyltransferase subunit 2
Q2RS05	Rru_A2290	0.286721	1.25061	0.47313	1.93438	0.854652	0.972113	0.414145	1.26931	6	Sulfate adenylyltransferase subunit 1 / adenylylsulfate kinase
Q2RS04	Rru_A2291	0.520921	1.13551	0.000958836	6.99417	0.00114866	5.19083	0.0341554	0.599715	6	DNA/RNA non-specific endonuclease
Q2RS03	Rru_A2292	0.663869	1.84339	0.39066	0.278597	0.625455	1.3115	0.566158	1.83275	1	Uncharacterized protein
Q2RRZ8	Rru_A2297	0.0120298	2.12685	0.337268	1.14026	0.336572	0.774077	0.234521	1.39379	4	Ribokinase
Q2RRZ7	Rru_A2298	0.729919	0.957084	0.00925674	0.392426	0.710596	0.925095	0.000967875	1.80145	5	Uncharacterized protein
Q2RRZ4	Rru_A2301	0.0250439	1.47172	0.999603	0.999746	0.10548	0.569605	0.915516	0.964909	3	ABC transporter component
Q2RRZ3	Rru_A2302	0.229299	0.859861	0.0315409	0.500178	0.0132938	0.554045	0.438593	0.892546	6	Periplasmic binding protein/LacI transcriptional regulator
Q2RRZ2	Rru_A2303	0.0520272	1.73853	0.283825	0.669081	0.0447773	0.588	0.906409	1.03641	3	Deoxyribose-phosphate aldolase
Q2RRZ0	Rru_A2305	#N/A	#N/A	#N/A	#N/A	0.517343	0.926837	#N/A	#N/A	0	Haloacid dehalogenase-like hydrolase
Q2RRY8	Rru_A2307	0.489281	1.38261	0.346906	0.69702	0.24581	0.427615	0.935794	0.979572	1	Twin-arginine translocation pathway signal
Q2RRY7	Rru_A2308	#N/A	#N/A	#N/A	#N/A	0.546287	1.26885	#N/A	#N/A	0	Transcriptional regulator, ArsR family
Q2RRY6	Rru_A2309	0.0298053	2.00063	0.631165	0.490836	0.0765481	1.50585	0.43469	8.1661	6	NADH peroxidase
Q2RRY5	Rru_A2310	0.0227189	0.672177	0.171686	0.711323	0.0887728	2.37864	0.35357	1.21154	4	Cytochrome c family protein
Q2RRY4	Rru_A2311	0.152263	5.11607	0.00746559	12.6828	0.0248659	1.81961	0.567193	1.27859	1	Transcriptional regulator, IclR family
Q2RRX8	Rru_A2317	0.460209	1.30873	0.35302	1.60381	0.81357	0.963055	0.994331	1.00262	2	Pyruvate carboxylase
Q2RRX7	Rru_A2318	0.0375183	0.608243	0.591923	1.12144	0.459883	0.757646	0.012163	0.465498	4	2-methylcitrate dehydratase
Q2RRX6	Rru_A2319	0.0113632	0.518294	0.771163	0.86794	0.160515	0.24502	0.039596	0.531655	5	Citrate synthase
Q2RRX5	Rru_A2320	0.39493	0.722828	0.792915	1.14228	0.875165	1.07245	0.342004	0.658541	2	2,3-dimethylmalate lyase
Q2RRX4	Rru_A2321	0.0662475	0.362805	0.481983	1.51259	0.960212	0.970305	0.0907519	0.432923	3	Methyl-accepting chemotaxis sensory transducer
Q2RRW5	Rru_A2330	0.965302	0.979099	0.104317	0.43648	0.974341	0.964372	0.0481395	2.16242	1	Response regulator receiver domain protein (CheY)
Q2RRU9	Rru_A2346	0.0201206	1.70998	0.0541937	1.5279	0.445695	0.859571	0.639859	0.95001	5	Uncharacterized protein
Q2RRU8	Rru_A2347	0.505078	0.901515	0.336649	1.17697	0.803401	0.969933	0.41387	0.872895	6	Uncharacterized protein
Q2RRU2	Rru_A2353	0.197537	1.475	0.00710147	2.82317	0.01748	1.85305	0.739148	1.08692	4	Tetratricopeptide TPR_4
Q2RRU1	Rru_A2354	0.15658	1.29596	0.127036	1.25646	0.90151	1.02787	0.344717	1.20434	6	Adenylate cyclase
Q2RRT9	Rru_A2356	0.00363949	0.702219	0.090901	0.803817	0.0467657	1.66131	0.0190361	1.36421	6	Extracellular solute-binding protein, family 5
Q2RRT3	Rru_A2362	0.0144691	0.404575	0.0278517	0.348032	0.124591	1.29346	0.069082	1.64751	5	Peptide methionine sulfoxide reductase MsrA
Q2RRS6	Rru_A2369	0.607371	1.1987	0.201933	1.63007	0.0151688	1.82132	0.78808	1.12155	3	Uncharacterized protein
Q2RRS0	Rru_A2375	0.0335412	1.83746	0.185038	1.28271	0.509614	0.854569	0.112671	1.20853	1	Uncharacterized protein
Q2RRR8	Rru_A2377	0.257839	1.88505	0.435513	1.36404	0.156832	0.783082	0.827499	0.851959	1	Predicted transcriptional regulators
Q2RRR4	Rru_A2381	0.96471	0.974026	0.272624	0.524408	0.6223	1.28525	0.517939	1.356	1	Lipocalin-like protein
Q2RRR0	Rru_A2385	0.0114381	2.03845	0.000166528	3.35066	0.00462059	2.08382	0.0185129	1.36256	5	Substrate-binding region of ABC-type glycine betaine transport system
Q2RRQ9	Rru_A2386	0.000319167	0.111071	0.500819	0.713112	0.197682	7.75772	0.196799	0.694655	2	Uncharacterized protein
Q53046	Rru_A2398	0.00180378	12.5665	0.019785	2.19112	0.0471973	1.79385	0.0421909	11.307	6	Pyruvate-flavodoxin oxidoreductase
Q2RRP5	Rru_A2400	6.26898e-07	0.358223	0.277253	0.53519	0.0345155	4.19586	0.186378	2.67619	6	Ribulose bisphosphate carboxylase
Q2RRP3	Rru_A2402	0.00632185	4.66245	0.0435012	5.92869	0.0100474	2.30488	0.183022	1.74006	2	Ribulose-phosphate 3-epimerase
Q2RRP2	Rru_A2403	0.000865855	2.00489	0.363955	1.38619	0.0930513	2.34678	0.117774	3.41535	4	Fructose-1,6-bisphosphatase class 1
Q2RRP1	Rru_A2404	0.103722	0.821747	0.299798	0.800423	0.0113566	1.764	0.0870948	1.72883	6	Phosphoribulokinase
Q2RRP0	Rru_A2405	0.00611117	1.76024	0.219152	1.4548	0.00528649	2.00539	0.15377	2.37502	6	Transketolase
Q2RRN8	Rru_A2407	0.635656	1.11565	0.361135	0.788786	0.848703	0.9318	0.76431	0.953763	2	GCN5-related N-acetyltransferase
Q2RRN5	Rru_A2410	0.000346616	2.782	0.0145542	1.6064	0.00220001	0.606252	0.0663416	1.1008	6	Homoserine dehydrogenase
Q2RRN4	Rru_A2411	0.697674	1.02513	0.0116255	0.444513	0.0179366	0.671375	0.0531644	1.49588	6	Aminotransferase
Q2RRN3	Rru_A2412	0.00225553	6.96809	0.0276343	5.54068	0.222538	0.754223	0.952453	0.98674	5	OmpA/MotB
Q2RRN2	Rru_A2413	0.00783621	12.4079	0.0474914	21.3059	0.040369	1.99919	0.783061	1.04563	5	Poly(R)-hydroxyalkanoic acid synthase, class I
Q2RRM8	Rru_A2417	0.522783	0.82433	0.199105	0.776068	0.460742	0.757179	0.475082	0.822107	5	Lipoprotein YaeC
Q2RRM7	Rru_A2418	0.689176	1.12773	0.783655	0.868879	0.115484	0.28153	0.0647338	0.416946	2	Binding-protein-dependent transport systems inner membrane component
Q2RRM6	Rru_A2419	0.0334473	1.6352	0.74217	0.934695	0.0161586	0.173945	0.000431898	0.364208	6	ABC transporter component
Q2RRM5	Rru_A2420	0.00536797	9.92765	0.00474452	4.29544	0.337442	1.2169	0.0313164	2.50866	1	Transferase hexapeptide repeat
Q2RRM4	Rru_A2421	0.00143455	0.368906	0.0615328	0.367696	0.195862	0.561323	0.111835	0.679951	6	N-acetyl-gamma-glutamyl-phosphate reductase
Q2RRM3	Rru_A2422	0.0201723	2.81545	0.280524	1.38573	0.0415279	0.652897	0.407463	1.51108	2	Uncharacterized protein
Q2RRM2	Rru_A2423	0.00307278	3.53971	0.0282549	1.6988	0.033474	0.725308	0.0618291	1.31611	5	Aminotransferase
Q2RRM1	Rru_A2424	0.000807082	4.98141	0.00270713	4.33066	0.0127912	0.704191	0.524925	0.85746	2	Gamma-glutamyltranspeptidase
Q2RRM0	Rru_A2425	0.176954	1.49177	0.886446	1.02872	0.75868	1.13307	0.2012	1.23722	2	Peptidase M48
Q2RRL7	Rru_A2428	0.704128	0.969284	0.0820422	0.627544	0.140178	1.50319	0.0393317	2.34407	6	DSBA oxidoreductase
Q2RRL3	Rru_A2432	0.452474	1.24663	0.0752717	1.58868	0.363475	0.790257	0.461096	0.824374	4	Thiazole synthase
Q2RRL2	Rru_A2433	0.166434	1.89877	0.00420754	1.94915	0.122336	0.668021	0.827862	0.891027	1	3-dehydroquinate dehydratase
Q2RRL1	Rru_A2434	0.000614274	0.152182	0.0645527	0.0882869	0.023374	0.442717	0.592575	0.863794	2	Biotin carboxyl carrier protein
Q2RRL0	Rru_A2435	0.0427716	1.41795	0.150522	0.812621	0.0728719	0.621116	0.290927	1.07045	6	Acetyl-CoA carboxylase, biotin carboxylase
Q2RRK7	Rru_A2438	0.00248936	0.309159	0.00401287	0.166678	0.088659	0.64678	0.000719625	0.459874	2	Mammalian cell entry related
Q2RRK6	Rru_A2439	0.0112778	2.01438	0.906544	1.02472	0.0669374	0.682891	0.231392	1.26892	2	Mammalian cell entry related
Q2RRK5	Rru_A2440	0.0719539	0.778048	0.117124	0.67398	0.101349	1.39259	0.117287	1.48964	1	NADH:ubiquinone oxidoreductase 17,2 kD subunit
Q2RRK4	Rru_A2441	0.449471	0.632375	0.210182	2.74393	0.802824	0.86977	0.145375	0.26204	1	Ribonucleoside-diphosphate reductase class II
Q2RRJ8	Rru_A2447	0.000975212	2.50256	0.254513	2.24405	0.648488	0.891082	0.742912	1.08275	3	Mammalian cell entry related
Q2RRJ7	Rru_A2448	0.0801041	2.24162	0.215151	1.75552	0.485794	0.579159	0.515578	1.57153	1	Uncharacterized protein
Q2RRJ5	Rru_A2450	0.022876	0.462879	0.662256	0.901202	0.226789	1.45607	0.39641	0.82429	4	Peptidase M48, Ste24p
Q2RRJ3	Rru_A2452	0.939481	0.973628	0.216394	0.662327	0.751616	1.14029	0.231551	1.38925	2	Uncharacterized protein
Q2RRI9	Rru_A2456	4.24136e-05	2.00396	0.05475	1.33252	0.0264923	0.704234	0.58718	1.04643	6	D-3-phosphoglycerate dehydrogenase
Q2RRI5	Rru_A2460	0.682634	0.775629	0.147098	0.427667	0.287732	0.0954004	0.521226	0.668061	1	Chemotaxis sensory transducer
Q2RRI3	Rru_A2462	0.962257	1.01164	0.132943	3.209	0.252307	0.6049	0.00482454	0.250878	1	Carboxylate-amine ligase Rru_A2462
Q2RRI2	Rru_A2463	0.00141373	0.613719	0.0123505	0.571505	0.547737	1.07041	0.55565	0.948629	2	N-formylglutamate amidohydrolase
Q2RRI1	Rru_A2464	0.0240914	1.32425	0.0554073	2.29099	0.0988036	1.80684	0.983221	1.00232	3	Hydroxypyruvate reductase
Q2RRI0	Rru_A2465	0.001839	4.26653	0.00581422	2.73028	0.0694004	0.683229	0.913233	1.01502	6	Pyruvate kinase
Q2RRH9	Rru_A2466	0.912321	0.983115	0.345619	0.729161	0.503619	1.06951	0.310896	1.41819	3	Glyoxalase/bleomycin resistance protein/dioxygenase
Q2RRH3	Rru_A2472	0.0297946	4.2068	0.0266988	5.18447	0.549586	1.29364	0.798237	0.923909	2	Uncharacterized protein
Q2RRH2	Rru_A2473	0.255182	0.846962	0.12994	0.706861	0.706646	0.941427	0.176577	1.30537	1	PAS/PAC sensor signal transduction histidine kinase
Q2RRH0	Rru_A2475	0.941906	0.977261	0.0768095	0.510394	0.591034	1.1422	0.0475283	2.52864	3	Glycine betaine/L-proline transport ATP-binding subunit
Q2RRG9	Rru_A2476	0.057961	0.446518	0.00683206	0.299266	0.202929	0.153887	0.0062016	2.1351	1	Binding-protein-dependent transport systems inner membrane component
Q2RRG8	Rru_A2477	0.000806313	0.333689	0.0108998	0.488615	0.0591586	3.15752	0.000994096	1.9688	6	Substrate-binding region of ABC-type glycine betaine transport system
Q2RRG7	Rru_A2478	0.00681129	0.410772	0.00406776	0.239995	0.102231	0.400182	0.00783017	0.804034	4	ArgK protein
Q2RRG6	Rru_A2479	0.000821302	5.65799	0.0132409	2.27224	0.0820718	0.718024	0.0955768	1.75004	6	Methylmalonyl-CoA mutase
Q2RRG5	Rru_A2480	0.00137224	7.24944	0.0153402	3.32479	0.0342928	0.606225	0.00136999	1.5605	6	Methylmalonyl-CoA mutase
Q2RRG2	Rru_A2483	0.0130135	3.26473	0.0445037	2.86613	0.453189	1.12582	0.261252	1.21878	6	5'-Nucleotidase
Q2RRG1	Rru_A2484	0.244598	1.58953	0.0638174	5.27083	0.377676	0.141745	0.674564	1.18805	1	Chemotaxis sensory transducer
Q2RRG0	Rru_A2485	#N/A	#N/A	#N/A	#N/A	0.244563	1.4361	#N/A	#N/A	0	Alpha,alpha-trehalose-phosphate synthase (UDP-forming)
Q2RRF9	Rru_A2486	0.000138404	2.37757	0.0366195	1.36872	0.0209007	0.772238	0.0224367	1.37243	3	Glucokinase
Q2RRE8	Rru_A2497	0.00029668	0.457186	0.0036885	0.353291	0.379243	0.786582	0.896293	0.987894	4	Peptide chain release factor 3
Q2RRE7	Rru_A2498	0.000306136	2.43375	0.200112	1.45814	0.0544285	0.50819	0.567681	1.10492	2	ABC transporter component
Q2RRE5	Rru_A2500	0.313612	1.05601	0.827687	1.03999	0.10925	1.59401	0.0302004	1.67008	2	Rhodanese-like
Q2RRE2	Rru_A2503	0.063032	2.78757	0.0926158	2.11162	0.189312	0.718012	0.226277	1.21716	2	Hydroxypyruvate isomerase
Q2RRE1	Rru_A2504	0.114846	2.06312	0.0684456	1.85525	0.0850513	0.695053	0.00215186	1.57426	4	Coproporphyrinogen III oxidase, anaerobic
Q2RRD9	Rru_A2506	0.00117989	3.15326	0.439851	1.39492	0.293573	1.20161	0.0695351	2.31261	4	Enoyl-CoA hydratase / short chain enoyl-CoA hydratase
Q2RRD8	Rru_A2507	0.0102953	2.88037	0.193483	1.21398	0.268717	0.934053	0.0579503	1.88526	1	Orotate phosphoribosyltransferase
Q2RRD7	Rru_A2508	0.0042463	27.2466	0.447817	1.50835	0.987558	1.0075	0.00923874	17.7573	3	5-aminolevulinate synthase
Q2RRD6	Rru_A2509	0.882193	0.986989	0.15949	0.750763	0.922367	1.02207	0.00418525	1.33268	6	Fructose-bisphosphate aldolase
Q2RRD5	Rru_A2510	1.62209e-05	2.40395	0.00883478	2.04977	0.136204	1.14589	0.00448494	1.38773	4	Uncharacterized protein
Q2RRD3	Rru_A2512	0.0311854	3.12724	0.00524541	1.94251	0.0325166	0.761556	0.868368	0.974542	6	3-oxoacyl-(Acyl-carrier-protein) reductase
Q2RRD2	Rru_A2513	5.86678e-06	0.233786	0.297908	0.737499	0.52213	1.71348	1.39133e-06	0.442769	4	Acetyl-CoA hydrolase/transferase
Q2RRC8	Rru_A2517	0.0508715	2.14375	0.00351271	2.01022	0.492078	0.799177	0.700616	0.940181	5	AMP-dependent synthetase and ligase
Q2RRC5	Rru_A2520	0.242505	0.534436	0.213146	0.231288	0.0948835	0.818836	0.313538	2.31166	1	Penicillin-binding protein 1A
Q2RRC3	Rru_A2522	0.0244168	1.51135	0.00704335	2.41486	0.0618488	1.62197	0.513361	0.91571	2	Uncharacterized protein
Q2RRC1	Rru_A2524	0.467933	0.881583	0.614661	1.27791	0.831	1.06097	0.644011	0.813953	5	Peptidase U32
Q2RRC0	Rru_A2525	0.0727993	1.60752	0.0388155	0.485316	0.342104	0.85384	0.0123356	4.38996	5	Peptidase U32
Q2RRB9	Rru_A2526	0.00646768	2.91582	0.391203	1.27126	0.260525	0.704193	0.238431	1.68689	4	Uncharacterized protein
Q2RRB8	Rru_A2527	#N/A	#N/A	#N/A	#N/A	0.234127	0.4419	#N/A	#N/A	0	Uncharacterized protein
Q2RRB7	Rru_A2528	0.0891204	3.16848	0.0624746	6.98091	0.525233	1.51249	0.269183	0.706133	2	Putative flagellar hook-associated protein 3 FlgL
Q2RRB6	Rru_A2529	0.194945	2.29994	0.0897706	4.963	0.429421	1.76895	0.0985593	0.569296	2	Uncharacterized protein
Q2RRB5	Rru_A2530	0.00137376	10.5087	0.20866	2.71149	0.778173	1.35457	0.235201	1.98329	2	Uncharacterized protein
Q2RRB4	Rru_A2531	0.00886227	3.31042	0.580637	1.73306	0.430714	0.804254	0.110447	2.13335	1	Uncharacterized protein
Q2RRB1	Rru_A2534	0.0242955	1.71887	0.764526	1.08929	0.417926	0.716428	0.260545	1.31396	6	Flagellin-like
Q2RRB0	Rru_A2535	0.864554	1.08843	0.47128	0.756464	0.0447066	0.300121	0.819346	1.13055	3	Flagellar hook-associated protein 2 (FliD, filament cap protein)
Q2RRA9	Rru_A2536	0.008178	3.74821	0.472982	1.57497	0.520302	0.712724	0.00930068	1.70093	3	Uncharacterized protein
Q2RRA8	Rru_A2537	#N/A	#N/A	#N/A	#N/A	0.205749	3.28008	#N/A	#N/A	0	RNA polymerase, sigma-24 subunit, ECF subfamily
Q2RRA3	Rru_A2542	0.00452388	12.6349	0.00245199	3.07159	0.593736	0.885113	0.0703826	4.12067	2	Circadian clock protein KaiC
Q2RRA2	Rru_A2543	0.00126631	0.285382	0.00757274	0.304995	0.0220557	2.19035	0.0178182	2.00446	4	KaiB
Q2RRA1	Rru_A2544	0.689993	1.09847	0.0185992	0.874327	0.00438704	1.50181	0.0106423	2.08283	4	Signal transduction histidine kinase
Q2RR96	Rru_A2549	0.551847	1.34368	0.074911	1.55375	0.253757	1.46936	0.341098	1.26192	2	HAD-superfamily hydrolase subfamily IIB
Q2RR93	Rru_A2552	4.36585e-05	2.04405	0.0525387	1.27462	0.110173	0.821868	0.0193925	1.31308	4	Uncharacterized protein
Q2RR92	Rru_A2553	0.00288666	17.2744	0.975583	0.967778	0.926916	1.02547	0.414056	17.6532	1	Methylase involved in ubiquinone/menaquinone biosynthesis-like
Q2RR89	Rru_A2556	0.00248811	2.49941	0.040618	3.12136	0.252157	1.26495	0.713156	1.05596	4	Mandelate racemase/muconate lactonizing enzyme
Q2RR88	Rru_A2557	5.25206e-07	2.22269	0.0174852	1.51471	0.0135488	0.785966	0.0206607	1.1784	6	Uncharacterized protein
Q2RR87	Rru_A2558	0.853839	0.956734	0.326625	1.2872	0.0557934	0.824135	0.272429	0.676092	2	Transglutaminase-like
Q2RR83	Rru_A2562	0.348192	1.43079	0.744993	0.940345	0.393606	0.654328	0.0223335	1.45361	1	CheW protein
Q2RR80	Rru_A2568	#N/A	#N/A	#N/A	#N/A	0.280635	1.55478	#N/A	#N/A	0	HesB/YadR/YfhF
Q2RR79	Rru_A2569	0.900479	1.03308	0.0992135	0.485382	#N/A	#N/A	0.41961	1.27664	1	Uncharacterized protein
Q2RR78	Rru_A2570	0.705262	0.776519	0.0554354	1.8118	0.17177	1.14182	0.485404	0.572668	6	Cysteine desulfurase
Q2RR77	Rru_A2571	0.000125446	2.54268	0.0695187	2.03568	0.587992	1.10653	0.0676756	1.37566	3	FeS assembly protein SufD
Q2RR76	Rru_A2572	0.296094	1.18022	0.412343	1.21195	0.367163	1.23278	0.48452	1.18897	3	FeS assembly ATPase SufC
Q2RR73	Rru_A2575	1.81488e-05	0.143403	0.000172932	0.174052	0.441708	0.747086	0.139008	0.888107	2	Uncharacterized protein
Q2RR72	Rru_A2576	0.00474755	3.60902	0.0249466	4.86408	0.459003	1.1532	0.805952	0.910304	6	1,4-alpha-glucan branching enzyme GlgB
Q2RR47	Rru_A2601	0.0549466	1.47877	0.0903023	1.80872	0.226262	0.9142	0.45657	0.778568	2	Uncharacterized protein
Q2RR46	Rru_A2602	0.00878605	4.22999	0.00172662	4.229	0.242533	1.32708	0.72417	1.15689	3	Periplasmic sensor diguanylate cyclase/phosphodiesterase
Q2RR45	Rru_A2603	0.000860599	2.36193	0.358178	1.16425	0.0125948	0.555252	0.384539	1.17057	6	Two component transcriptional regulator, LuxR family
Q2RR43	Rru_A2605	0.0738253	1.32885	0.732858	0.936458	0.643503	1.16213	0.0738985	1.31913	3	Phosphoheptose isomerase
Q2RR41	Rru_A2607	0.00430412	0.671825	0.0018606	0.602074	0.0338819	1.3104	0.00216354	1.51257	5	Uncharacterized protein
Q2RR36	Rru_A2612	0.0234731	1.88663	0.0044018	1.7456	0.177382	1.19703	0.202574	1.20602	6	UspA
Q2RR35	Rru_A2613	0.0810107	1.57638	0.000919109	1.29958	0.00633732	1.28211	0.00159635	1.64185	5	Uncharacterized protein
Q2RR33	Rru_A2615	0.482895	0.76395	0.251925	0.248405	0.00670964	0.470085	0.9668	1.02548	1	Transcriptional regulator, ArsR family
Q2RR32	Rru_A2616	0.415874	0.337821	0.821945	1.24432	0.179013	6.12927	0.861861	0.82113	4	Histone deacetylase superfamily
Q2RR30	Rru_A2618	0.0516162	1.66245	0.0479181	0.7737	0.0931649	0.532055	0.0694791	1.22781	6	Farnesyl-diphosphate synthase
Q2RR29	Rru_A2619	#N/A	#N/A	#N/A	#N/A	0.0038272	0.574279	#N/A	#N/A	0	1-deoxy-D-xylulose-5-phosphate synthase 2
Q2RR27	Rru_A2621	0.188727	1.67024	0.487791	1.65243	0.009654	0.617293	0.887144	1.08376	5	Peptidase S49
Q2RR25	Rru_A2623	0.237706	1.26943	0.354932	1.21626	0.0739135	0.70288	0.250303	0.721336	5	Chorismate synthase
Q2RR24	Rru_A2624	0.00134373	0.595612	0.115122	0.790005	0.223133	0.749438	0.00131584	0.608509	6	Enoyl-[acyl-carrier-protein] reductase [NADH]
Q2RR22	Rru_A2626	0.000556415	0.17469	0.109439	0.204141	0.0292021	0.470398	0.966268	0.986039	3	Chaperone DnaJ
Q2RR21	Rru_A2627	0.320495	0.900374	0.0914661	0.65102	0.345147	1.1804	0.00106596	1.69752	2	Pyridoxine/pyridoxamine 5'-phosphate oxidase
Q2RR19	Rru_A2629	0.0786189	1.33396	0.0606882	1.79131	0.684001	0.920421	0.197879	0.693143	3	Beta-lactamase-like
Q2RR18	Rru_A2630	0.021193	2.98684	0.394662	2.14348	0.278915	0.758341	0.723051	0.7883	1	N-acetylglucosamine kinase
Q2RR17	Rru_A2631	0.00715499	1.70534	0.810405	1.05241	0.00778924	0.66853	0.394324	1.20416	5	Uncharacterized protein
Q2RR10	Rru_A2638	0.309212	0.796418	0.999925	1.00004	0.0117483	1.73271	0.493713	1.33485	4	Uncharacterized protein
Q2RR09	Rru_A2639	0.783036	0.891421	0.247914	2.06096	0.842406	1.04959	0.264634	0.599738	1	Uncharacterized protein
Q2RR08	Rru_A2640	0.0127426	2.9661	0.637719	0.498163	0.855247	1.08726	0.601546	2.26843	1	Uncharacterized protein
Q2RR06	Rru_A2642	0.532615	1.12993	0.0199021	2.04026	0.0251757	1.45694	0.120143	0.666479	1	Alpha/beta hydrolase fold
Q2RR01	Rru_A2647	0.07905	0.325728	0.0668003	0.279079	0.386725	0.706113	0.470196	1.29524	1	Uncharacterized protein
Q2RQZ9	Rru_A2649	0.327226	1.73097	0.037711	4.87941	0.0545053	2.08675	0.915458	0.93494	2	endo alpha-1 4 polygalactosaminidase or related polysaccharide hydrolase-like
Q2RQZ5	Rru_A2653	0.0114819	3.46419	0.149564	1.64401	0.607422	1.1378	0.183918	2.28767	2	Uncharacterized protein
Q2RQZ4	Rru_A2654	0.298959	0.738125	0.552087	1.25567	0.587878	1.40665	0.804545	1.05747	2	Acylphosphatase
Q2RQZ3	Rru_A2655	#N/A	#N/A	#N/A	#N/A	0.836287	0.845882	#N/A	#N/A	0	Probable intracellular septation protein A
Q2RQZ2	Rru_A2656	0.00740492	0.516267	0.00798607	0.477229	0.204376	1.43538	0.0368047	1.58386	1	ATP12 ATPase
Q2RQZ1	Rru_A2657	0.0098657	6.43866	0.000209127	6.72048	0.0700602	1.31703	0.186445	1.62008	6	AsmA
Q2RQY9	Rru_A2659	4.80465e-05	0.652437	0.00961403	0.516332	0.736315	0.851671	0.0205611	0.769434	2	Pseudouridine synthase
Q2RQY6	Rru_A2662	0.562436	1.04646	0.0333752	1.42784	0.145752	0.881426	0.0199155	0.668751	5	Peptidase S1C, Do
Q2RQY5	Rru_A2663	0.0124734	1.50875	0.909426	0.966697	0.0394005	0.20768	0.479603	0.820583	2	50S ribosomal protein L17
Q2RQY4	Rru_A2664	0.000290693	0.443101	0.00339105	0.406264	0.125989	0.605652	0.0217783	0.753822	6	DNA-directed RNA polymerase subunit alpha
Q2RQY3	Rru_A2665	1.44316e-05	0.297473	0.000273992	0.218081	0.0577541	0.445929	0.00064363	0.635405	5	30S ribosomal protein S11
Q2RQY2	Rru_A2666	1.09966e-06	0.165086	0.0196084	0.128217	0.319538	0.562127	0.0315948	0.58393	5	30S ribosomal protein S13
Q2RQY1	Rru_A2667	0.00034995	0.0587854	0.0235507	0.131196	0.409868	1.22708	0.987673	1.00272	3	Adenylate kinase
Q2RQY0	Rru_A2668	0.0049787	0.00757341	0.0209048	0.0188722	#N/A	#N/A	0.0841193	0.648054	1	Protein translocase subunit SecY
Q2RQX9	Rru_A2669	0.348952	0.196724	0.759105	1.42352	0.597287	1.21487	0.358935	0.214155	1	50S ribosomal protein L15
Q2RQX8	Rru_A2670	0.000494173	0.000243697	0.0132945	0.000270151	0.470818	0.267007	0.195408	0.819841	1	50S ribosomal protein L30
Q2RQX7	Rru_A2671	#N/A	#N/A	#N/A	#N/A	#N/A	#N/A	#N/A	#N/A	3	0S ribosomal protein S5
Q2RQX6	Rru_A2672	0.00106717	0.404919	0.0557902	0.480478	0.0175272	0.473909	0.000940169	0.394885	3	50S ribosomal protein L18
Q2RQX5	Rru_A2673	0.0571113	0.605138	0.000966078	0.3154	0.154847	0.57206	0.167033	0.893098	4	50S ribosomal protein L6
Q2RQX4	Rru_A2674	#N/A	#N/A	#N/A	#N/A	#N/A	#N/A	#N/A	#N/A	3	0S ribosomal protein S8
Q2RQX3	Rru_A2675	0.000287032	0.0683061	0.101528	0.0205685	0.42265	0	0.375906	0.722651	1	30S ribosomal protein S14
Q2RU09	Rru_A2677	#N/A	#N/A	#N/A	#N/A	#N/A	#N/A	#N/A	#N/A	6	0S ribosomal protein S2
Q2RQX1	Rru_A2677	0.00132954	0.0367077	0.0385486	0.0617665	0.841301	1.1061	0.0414384	0.584267	3	50S ribosomal protein L24
Q2RQW9	Rru_A2679	0.00379518	0.438916	0.00349395	0.304439	0.0429741	0.604146	0.400412	0.90212	2	30S ribosomal protein S17
Q2RQW8	Rru_A2680	0.00303866	0.0955641	0.00223918	0.165334	0.358354	0.683853	0.00741303	0.404722	2	50S ribosomal protein L29
Q2RQW7	Rru_A2681	0.0814059	1.15825	0.0613264	0.622098	0.0109978	0.570078	0.491535	1.10732	2	50S ribosomal protein L16
Q2RQW6	Rru_A2682	#N/A	#N/A	#N/A	#N/A	#N/A	#N/A	#N/A	#N/A	6	0S ribosomal protein S3
Q2RQW4	Rru_A2684	0.000158261	0.309621	0.0110895	0.257263	0.00699022	0.497443	0.0171813	0.665484	4	30S ribosomal protein S19
Q2RQW3	Rru_A2685	#N/A	#N/A	#N/A	#N/A	#N/A	#N/A	#N/A	#N/A	6	0S ribosomal protein L2
Q2RQW2	Rru_A2686	0.0510414	0.317255	0.275665	0.404135	0.842837	1.15677	0.103105	0.438648	1	50S ribosomal protein L23
Q2RQW1	Rru_A2687	#N/A	#N/A	#N/A	#N/A	#N/A	#N/A	#N/A	#N/A	6	0S ribosomal protein L4
Q2RQW0	Rru_A2688	#N/A	#N/A	#N/A	#N/A	#N/A	#N/A	#N/A	#N/A	5	0S ribosomal protein L3
Q2RQV9	Rru_A2689	0.00988317	0.28829	0.0754118	0.435116	0.729171	0.697955	0.578496	0.961429	1	30S ribosomal protein S10
Q2RQV8	Rru_A2690	0.29821	14.0408	0.391383	19.992	0.404209	0.470849	0.714667	0.736321	2	Elongation factor Tu 1
Q2RQV7	Rru_A2691	8.32893e-06	2.46862	0.000778851	1.87093	0.000243726	0.532411	0.0416407	0.756676	6	Elongationfactor G
Q2RQV6	Rru_A2692	#N/A	#N/A	#N/A	#N/A	#N/A	#N/A	#N/A	#N/A	4	0S ribosomal protein S7
Q2RQV5	Rru_A2693	3.4827e-05	0.138113	0.0184657	0.234663	0.0603714	0.527384	0.000676245	0.410404	3	30S ribosomal protein S12
Q2RQV4	Rru_A2694	0.0188081	2.91894	0.0561775	1.75859	0.136067	0.739282	0.699621	1.06821	6	DNA-directed RNA polymerase subunit beta'
Q2RQV3	Rru_A2695	1.92379e-05	2.8062	0.0486655	1.90485	0.107087	0.746373	0.588191	1.15958	6	DNA-directed RNA polymerase subunit beta
Q2RQV2	Rru_A2696	0.0337716	0.465782	0.118507	0.409153	0.042733	0.444592	0.117177	0.595624	4	50S ribosomal protein L7/L12
Q2RQV1	Rru_A2697	0.876722	1.01383	0.0602038	0.669551	0.00946093	0.466196	0.0397976	0.732845	6	50S ribosomal protein L10
Q2RQV0	Rru_A2698	#N/A	#N/A	#N/A	#N/A	#N/A	#N/A	#N/A	#N/A	3	0S ribosomal protein L1
Q2RQU9	Rru_A2699	0.00272556	0.22609	0.0490528	0.126915	0.218192	0.614111	0.934528	1.0209	3	50S ribosomal protein L11
Q2RQU8	Rru_A2700	0.00410546	0.447478	0.0126218	0.382371	0.821229	0.927791	0.913238	1.01142	6	Transcription antitermination protein nusG
Q2RQU6	Rru_A2702	0.00029112	0.472749	0.00063675	0.243033	0.161244	0.634162	0.00938016	1.2417	2	Elongation factor Tu 2
Q2RQU1	Rru_A2707	0.717171	0.877384	0.333486	0.586713	0.184039	1.5578	0.931121	0.963603	2	Alpha/beta hydrolase fold
Q2RQT9	Rru_A2709	#N/A	#N/A	#N/A	#N/A	0.448103	0.63776	#N/A	#N/A	0	Thioesterase superfamily
Q2RQT8	Rru_A2710	0.905578	0.960239	0.730032	1.10006	0.030591	0.4654	0.40747	0.734457	2	Gram negative topoisomerase IV, subunit B
Q2RQT4	Rru_A2714	0.853546	1.06053	0.232416	1.3805	0.0889091	1.52123	0.599864	1.17278	3	Uncharacterized protein
Q2RQT1	Rru_A2717	0.012387	1.39414	0.278277	0.923685	0.00332345	1.45993	0.00357703	1.98385	5	Isochorismatase hydrolase
Q2RQT0	Rru_A2718	0.000474393	5.41692	0.00530649	2.7834	0.0801895	0.679801	0.178123	1.32567	5	DEAD/DEAH box helicase
Q2RQS9	Rru_A2719	0.00659803	2.7736	0.0447958	4.66176	0.117412	0.746083	0.309903	0.586819	4	Phenylpyruvate decarboxylase
Q2RQS8	Rru_A2720	0.000124737	0.347436	0.130958	0.408725	0.0262314	2.91171	0.270273	1.61913	2	4Fe-4S ferredoxin, iron-sulfur binding
Q2RQS7	Rru_A2721	0.311223	1.34898	0.246424	0.728142	0.926032	0.963287	0.14849	1.51591	2	2-oxoglutarate synthase, alpha subunit
Q2RQS6	Rru_A2722	0.0183085	0.459493	0.000731501	0.218917	0.975207	0.989305	0.027489	1.50169	5	2-oxoglutarate synthase, beta subunit
Q2RQS5	Rru_A2723	0.00126854	8.02351	0.0165611	7.54295	0.273176	1.29197	0.343583	1.37623	1	Rubrerythrin
Q2RQS4	Rru_A2724	0.00188089	5.63581	0.0167153	5.70811	0.155929	1.5467	0.0832049	1.95809	3	Phospholipase/Carboxylesterase
Q2RQR9	Rru_A2729	0.0223817	0.450207	0.0076244	0.365663	0.629477	0.958851	0.408148	1.134	4	Uncharacterized protein
Q2RQR1	Rru_A2737	0.00477263	1.62985	0.0099515	1.83475	0.0279415	1.62723	0.163439	1.33133	3	Glycosyl transferase, family 2
Q2RQR0	Rru_A2738	0.000400953	1.68255	0.0132429	2.46329	0.0426568	1.53376	0.850664	1.02003	6	Glycosyl transferase, group 1
Q2RQQ9	Rru_A2739	0.0204786	1.88416	0.0176901	3.41317	0.259388	1.25968	0.225405	0.713575	1	Uncharacterized protein
Q2RQQ8	Rru_A2740	0.00356742	1.68678	0.0124666	2.35301	0.961605	0.99566	0.0204749	0.703895	4	UDP-N-acetylglucosamine 2-epimerase
Q2RQQ7	Rru_A2741	7.82445e-06	3.85466	7.674e-05	3.91182	0.30637	1.07533	0.628051	1.06686	6	Polysaccharide biosynthesis protein CapD
Q2RQQ1	Rru_A2747	4.61877e-05	3.07216	0.00924967	2.0405	0.0157616	0.735723	0.590334	1.13924	1	Short-chain dehydrogenase/reductase SDR
Q2RQP7	Rru_A2751	0.304892	0.0627971	0.00432364	10.1947	0.106253	2.22182	0.4405	0.326251	1	Uncharacterized protein
Q2RQP6	Rru_A2752	0.0220423	9.25664	0.186943	3.2215	0.675852	0.80938	0.331563	2.53	1	Signal transduction histidine kinase
Q2RQP0	Rru_A2758	7.22621e-07	0.471868	0.204341	0.806815	0.0471161	1.42429	0.117544	0.786405	5	Response regulator receiver domain protein (CheY)
Q2RQN8	Rru_A2760	0.0824514	0.355455	0.51624	1.49987	0.346764	0.386821	0.187572	0.561297	1	Uncharacterized protein
Q2RQN4	Rru_A2764	0.00146652	2.65396	0.397213	1.19089	0.00163256	0.409674	0.330149	1.2758	3	Uncharacterized protein
Q2RQN3	Rru_A2765	0.0177654	5.60936	0.351682	1.40448	0.00998209	0.447352	0.335376	1.72284	3	GCN5-related N-acetyltransferase
Q2RQN2	Rru_A2766	0.000848572	0.280511	0.371362	0.417651	0.981717	0.975218	0.174234	0.497435	1	DNA gyrase inhibitor YacG
Q2RQN1	Rru_A2767	0.00041439	2.49069	0.193346	2.19456	0.16161	0.668252	0.375075	1.41138	2	Ribonuclease G (RNase G)
Q2RQN0	Rru_A2768	0.00337821	6.19788	0.0354155	3.30784	0.0612953	0.74534	0.00573558	1.46758	3	Maf-like protein Rru_A2768
Q2RQM7	Rru_A2771	0.00148269	3.09819	0.000176371	2.65087	0.156609	1.1177	0.175812	1.10814	6	Histidinol dehydrogenase
Q2RQM6	Rru_A2772	0.00469881	2.81796	0.222468	1.41852	0.236287	0.713786	0.282425	1.38796	1	ATP phosphoribosyltransferase
Q2RQM4	Rru_A2774	0.00297231	5.16727	0.00116218	3.31707	0.0510514	0.575224	0.300544	1.40761	3	Chemotaxis sensory transducer
Q2RQM3	Rru_A2775	0.0084661	1.64541	0.0262166	5.58503	0.151471	5.22896	0.479459	0.934696	5	Dienelactone hydrolase
Q2RQL8	Rru_A2780	0.347839	1.1706	0.0637509	0.437617	0.00683024	0.599001	0.00462822	1.44974	2	Uncharacterized protein
Q2RQL7	Rru_A2781	0.00172636	2.03219	0.110449	0.788671	0.00202831	0.293483	0.182106	1.07159	5	UPF0261 protein Rru_A2781
Q2RQL5	Rru_A2783	0.194496	1.22931	0.514808	1.13166	0.128733	1.24943	0.211441	1.37619	4	Predicted periplasmic ligand-binding sensor protein
Q2RQL4	Rru_A2784	9.11763e-05	0.357036	0.0282841	0.604083	0.431316	1.29127	0.17282	0.849306	6	Basic membrane lipoprotein
Q2RQL0	Rru_A2788	8.54013e-05	2.21179	0.0163454	0.696828	0.0301745	0.815005	4.84656e-05	2.50312	4	N-isopropylammelide isopropylaminohydrolase
Q2RQK7	Rru_A2791	0.00331644	0.619369	0.0239575	0.431609	0.0207128	0.737549	0.873764	1.02094	4	Deoxyuridine 5'-triphosphate nucleotidohydrolase
Q2RQK6	Rru_A2792	0.000122583	1.87199	0.0102436	1.37655	0.0635725	0.780702	0.244425	1.07224	3	Thymidylate synthase ThyX
Q2RQK4	Rru_A2794	#N/A	#N/A	#N/A	#N/A	#N/A	#N/A	#N/A	#N/A	1	eoxycytidine triphosphate deaminase
Q2RQK2	Rru_A2796	0.00463538	2.31387	0.597166	1.0777	0.000258453	0.588957	0.302688	1.20169	5	Heavy metal translocatin P-type ATPase
Q2RQK1	Rru_A2797	0.0124117	0.460854	0.00137415	0.369638	0.556857	0.84725	0.411787	1.1207	5	Uncharacterized protein
Q2RQK0	Rru_A2798	0.00310608	6.05519	2.60646e-05	2.25291	0.0385226	0.516604	0.000959043	1.59368	2	Uncharacterized protein
Q2RQJ4	Rru_A2804	#N/A	#N/A	#N/A	#N/A	0.266769	3.74089	#N/A	#N/A	0	ABC transporter component
Q2RQJ0	Rru_A2808	0.00126432	0.127042	0.34839	0.80146	0.102176	2.95934	0.00163575	0.394877	3	Periplasmic protein-probably involved in high-affinity Fe2+ transport
Q2RQI7	Rru_A2811	0.727309	0.974884	0.0405591	0.777332	0.0206485	1.20935	0.0136678	1.40727	3	Ribosomal protein S12 methylthiotransferase RimO
Q2RQI5	Rru_A2813	0.00244703	0.427251	0.0131125	0.375871	0.366859	0.865512	0.9819	1.00272	1	Cyclic pyranopterin monophosphate synthase accessory protein
Q2RQI4	Rru_A2814	0.00773477	0.276299	0.0467992	0.470422	0.114896	3.22121	0.286572	1.15952	2	Molybdopterin synthase subunit MoaD
Q2RQI3	Rru_A2815	0.247979	1.37984	0.182251	0.709102	0.48471	1.18551	0.0324054	2.29059	1	Molybdopterin synthase subunit MoaE
Q2RQI1	Rru_A2817	0.00072123	0.00671559	0.0120475	0.0982157	0.0182505	8.26888	0.00195507	0.2452	6	Phasin
Q2RQI0	Rru_A2818	#N/A	#N/A	#N/A	#N/A	#N/A	#N/A	#N/A	#N/A	5	lanine--tRNA ligase
Q2RQH9	Rru_A2819	0.009704	0.747288	0.00745922	0.602318	0.118732	0.789186	0.499192	0.969512	5	Protein RecA
Q2RQH3	Rru_A2825	#N/A	#N/A	#N/A	#N/A	0.143457	2.60016	#N/A	#N/A	0	Flagellar basal-body rod protein FlgC
Q2RQG6	Rru_A2832	0.0554493	1.49474	0.00683094	2.23204	0.350692	1.38387	0.0527212	0.663886	5	Uncharacterized protein
Q2RQG2	Rru_A2836	0.00336095	4.00212	0.0171054	5.69768	0.224726	0.637812	0.0976311	0.529986	2	Uncharacterized protein
Q2RQG1	Rru_A2837	0.00145923	0.121282	0.00316832	0.266165	0.266892	1.62224	0.205292	0.852581	4	Response regulator receiver domain protein (CheY)
Q2RQF8	Rru_A2840	0.577921	1.18702	0.412685	1.54553	0.238359	1.5308	0.99521	1.00358	3	Flagellar motor switch protein FliM
Q2RQF7	Rru_A2841	0.360068	0.857874	0.0441253	2.14334	0.412028	1.23398	0.000506385	0.52693	4	Flagellar basal body-associated protein FliL
Q2RQF5	Rru_A2843	#N/A	#N/A	#N/A	#N/A	0.994262	1.00364	#N/A	#N/A	0	Uncharacterized protein
Q2RQF1	Rru_A2847	0.0197703	0.52912	0.0025269	0.363887	0.999661	0.99989	0.0049957	1.31908	4	Transcriptional regulators, TraR/DksA family
Q2RQF0	Rru_A2848	0.980974	0.989933	0.32365	0.47797	0.822417	0.922725	0.63885	1.2873	1	Uncharacterized protein
Q2RQE7	Rru_A2851	0.796033	1.11307	0.720732	0.907151	0.574852	0.897807	0.305244	0.562318	2	Uncharacterized protein
Q2RQE3	Rru_A2855	0.140788	1.56661	0.297178	1.1875	0.233923	1.14193	0.263971	1.40134	2	Uncharacterized protein
Q2RQE2	Rru_A2856	0.00622502	6.98735	0.00547444	8.37787	0.512163	0.895228	0.560749	0.818306	2	Putative flagellar protein FlaF
Q2RQE1	Rru_A2857	0.0119927	0.344817	0.0950812	0.696443	0.150116	0.668059	0.0123507	0.317096	1	Flagellar FlbT
Q2RQE0	Rru_A2858	0.0320041	1.32833	0.0661509	1.304	0.88245	0.974907	0.57193	0.922984	6	Flagellin-like
Q2RQD8	Rru_A2860	0.0160834	0.233697	0.345368	0.476404	0.468239	1.40756	0.630186	0.794684	1	Uncharacterized protein
Q2RQD3	Rru_A2865	0.00130888	3.29348	0.0106635	3.22437	0.424808	0.848975	0.325054	0.86788	3	Peptidase M24
Q2RQD2	Rru_A2866	0.863539	1.05607	0.506662	0.820344	0.298006	0.777708	0.15902	1.35552	3	LSU ribosomal protein L11P methyltransferase
Q2RQD1	Rru_A2867	0.303926	0.834447	0.912351	0.984292	0.629066	1.0625	0.807119	0.956782	4	Ornithine cyclodeaminase
Q2RQC8	Rru_A2870	0.827527	0.844455	0.720153	0.917275	0.0252214	0.36847	0.486268	0.490084	1	Integral membrane protein TerC
Q2RQC7	Rru_A2871	0.0226118	2.0709	0.335318	1.12411	0.0229895	0.564291	0.322341	1.1495	5	Peptidase M20D, amidohydrolase
Q2RQC6	Rru_A2872	0.00692412	4.3557	0.21346	2.60927	0.658305	0.894739	0.507866	1.18399	2	L-2-amino-thiazoline-4-carboxylic acid hydrolase
Q2RQC5	Rru_A2873	0.0438494	0.427875	0.0282584	0.260174	0.966786	1.00546	0.179335	1.51486	1	Extracellular ligand-binding receptor
Q2RQC4	Rru_A2874	0.028954	8.87812	0.10128	6.61131	0.0120921	0.27813	0.464265	1.28829	3	FAD dependent oxidoreductase
Q2RQC1	Rru_A2877	9.05344e-05	2.96306	0.0241097	1.83448	0.00147724	0.48361	0.040013	0.833108	6	L-threonine ammonia-lyase
Q2RQC0	Rru_A2878	0.0943333	1.65985	0.00927366	3.2989	0.153418	1.23549	0.0737467	0.690565	6	Uncharacterized protein
Q2RQB8	Rru_A2880	0.0912537	2.37419	0.0631715	2.98511	0.758822	0.918441	0.722528	0.905413	2	Uncharacterized protein
Q2RQB7	Rru_A2881	0.703714	1.1302	0.93763	0.978229	0.0560153	1.47956	0.975327	1.00937	3	Virulence protein
Q2RQB6	Rru_A2882	0.00056908	2.39363	0.203423	1.18529	0.0385615	0.654497	0.0472992	1.38613	5	RNA polymerase sigma factor
Q2RQB4	Rru_A2884	0.625111	0.893005	0.965852	0.988981	0.464168	0.841241	0.761605	0.923003	4	GatB/Yqey
Q2RQB3	Rru_A2885	0.228678	0.895423	0.00425268	0.536575	0.187042	0.857669	0.0143571	1.4107	3	Carbamoyl-phosphate synthase small chain
Q2RQB2	Rru_A2886	0.0288181	2.21936	0.0211747	1.56954	0.466082	0.824695	0.0736722	1.18901	5	Carbamoyl-phosphate synthase large chain
Q2RQB1	Rru_A2887	0.000626705	0.221469	0.0060117	0.31165	0.257454	1.248	0.83074	0.974086	2	Transcription elongation factor GreA
Q2RQA4	Rru_A2894	0.00246122	2.61852	0.0968447	1.70851	0.137739	1.08717	0.0480654	1.6514	3	ABC transporter component
Q2RQA3	Rru_A2895	0.624636	0.911983	0.00868627	2.09407	0.00522273	2.28023	0.694734	0.935221	4	Twin-arginine translocation pathway signal
Q2RQA2	Rru_A2896	0.170804	0.647009	0.850269	0.952381	0.318533	0.899515	0.364473	0.765399	3	Transcriptional regulator, AsnC family
Q2RQA1	Rru_A2897	0.0431255	0.0388545	0.190341	0.0196624	0.303017	2.33721	0.349365	0.576927	1	Alkyl hydroperoxide reductase/ Thiol specific antioxidant/ Mal allergen
Q2RQA0	Rru_A2898	0.331998	1.19108	0.661584	0.906005	0.706401	0.873085	0.380387	1.28012	2	Thioredoxin reductase
Q2RQ99	Rru_A2899	0.0024023	3.62906	0.0224474	1.66633	0.27151	0.816819	0.0818187	1.9113	3	Transcriptional regulator, LysR family
Q2RQ97	Rru_A2901	0.00207609	1.99845	0.270847	1.87052	0.118534	1.97212	0.80928	1.17851	3	Histidine triad (HIT) protein
Q2RQ96	Rru_A2902	0.579119	0.782888	0.694625	0.759316	0.977795	1.03074	0.868443	0.951608	1	Uncharacterized protein
Q2RQ95	Rru_A2903	0.712092	1.12169	0.320909	1.57963	0.746877	1.19527	0.533632	0.896224	2	Deoxyribodipyrimidine photo-lyase type I
Q2RQ87	Rru_A2911	0.0563286	2.31547	0.00537476	2.28406	0.876001	0.972785	0.871067	1.03736	4	ABC-type uncharacterized transport system auxiliary component-like
Q2RQ86	Rru_A2912	0.495335	1.07649	0.00743152	0.724795	0.694054	1.05557	0.048479	1.28305	5	Propeptide, PepSY amd peptidase M4
Q2RQ83	Rru_A2915	0.0363973	0.617756	0.113881	0.621436	0.351039	1.09836	0.789938	0.949221	1	Uncharacterized protein
Q2RQ80	Rru_A2918	0.475431	1.64075	0.00292642	3.43507	0.0144829	2.4424	0.8222	1.17709	1	Uncharacterized protein
Q2RQ76	Rru_A2922	0.120054	3.74695	0.293742	2.82275	#N/A	#N/A	0.343195	1.91464	1	Uncharacterized protein
Q2RQ67	Rru_A2931	0.00151207	19.1646	0.0178267	6.72563	0.135175	0.633734	0.287824	1.86109	1	UDP-N-acetylglucosamine 1-carboxyvinyltransferase
Q2RQ65	Rru_A2933	0.0755667	0.202457	0.197527	5.71509	0.297787	2.6925	0.0696932	0.183025	1	Uncharacterized protein
Q2RQ63	Rru_A2935	0.692009	1.10315	0.539066	0.821826	0.159157	0.784476	0.906853	1.0392	2	PAS/PAC sensor hybrid histidine kinase
Q2RQ62	Rru_A2936	0.267166	1.14481	0.0598401	0.720535	0.966246	0.989855	0.103891	1.23935	5	Dihydroorotase multifunctional complex type
Q2RQ61	Rru_A2937	0.877604	1.0707	0.627875	1.27544	0.661096	0.747149	0.0456693	2.1964	1	Asparagine synthetase
Q2RQ60	Rru_A2938	0.390902	1.09258	0.77153	1.04626	0.0494632	0.826048	0.0696604	0.750255	4	Glycosyl transferase, group 1
Q2RQ59	Rru_A2939	0.176189	1.38131	0.0853748	0.676624	0.686899	0.9151	0.0547304	1.42467	6	Uncharacterized protein
Q2RQ58	Rru_A2940	0.0737112	1.50224	0.902491	1.01711	0.441621	1.28091	0.0154007	1.54708	4	Glycine cleavage T protein (Aminomethyl transferase)
Q2RQ56	Rru_A2942	0.41549	1.19437	0.513357	1.17891	0.343168	1.43717	0.777982	0.919616	2	ABC transporter, transmembrane region
Q2RQ54	Rru_A2944	0.00155714	4.85436	0.214749	2.89286	0.191554	1.22141	0.454956	3.18272	2	ArgK protein
Q2RQ53	Rru_A2945	0.00217519	2.68123	0.008158	2.04933	0.706265	0.956463	0.0738123	1.38973	4	Uncharacterized protein
Q2RQ52	Rru_A2946	0.119367	2.41726	0.724	1.19263	0.0816684	0.630166	0.282641	1.24559	1	DNA mismatch repair protein MutL
Q2RQ51	Rru_A2947	0.0474878	1.40482	0.935455	1.00513	0.749042	1.042	0.000333939	1.48509	4	Glucose-6-phosphate isomerase
Q2RQ48	Rru_A2950	0.0013284	3.0488	0.0271058	1.97598	0.0864734	0.890369	0.0032484	1.37831	4	Farnesyltranstransferase
Q2RQ46	Rru_A2952	0.0929798	1.92382	0.0104642	6.06489	0.879777	0.972272	0.174381	0.346167	2	Methyltransferase small
Q2RQ43	Rru_A2955	8.39862e-05	2.89103	4.03065e-05	2.04144	0.116843	0.797795	0.352966	1.13893	6	Glycine--tRNA ligase beta subunit
Q2RQ42	Rru_A2956	0.00129696	2.22869	0.0463996	2.5193	0.068521	1.89958	0.0424469	1.58913	6	Pyruvate phosphate dikinase
Q2RQ38	Rru_A2962	0.0117688	1.61195	0.34886	1.16963	0.842186	1.02333	0.0465564	1.55824	3	Zinc-containing alcohol dehydrogenase superfamily
Q2RQ36	Rru_A2964	0.0275821	1.50529	0.0114608	1.69942	0.815768	1.03157	0.3279	0.866326	2	MaoC-like dehydratase
Q2RQ35	Rru_A2965	0.00121733	3.50304	0.0220245	3.11512	0.0112608	0.810253	0.95443	0.985484	2	FMN adenylyltransferase / riboflavin kinase
Q2RQ34	Rru_A2966	0.000707317	1.78331	0.224768	1.19174	0.108973	0.812102	0.171641	1.29532	6	Isoleucine--tRNA ligase
Q2RQ32	Rru_A2968	0.130799	0.334949	0.0375264	0.191416	0.830085	1.17671	0.985579	1.00199	2	Uncharacterized protein
Q2RQ30	Rru_A2970	0.00978267	2.03979	0.0171477	1.58032	0.740925	1.04389	0.0979491	1.40267	1	Precorrin-6A synthase (Deacetylating)
Q2RQ28	Rru_A2972	0.665363	0.906591	0.0455366	0.77576	0.557344	1.21528	0.703857	1.08148	5	Peptidase M16-like
Q2RQ27	Rru_A2973	0.000184084	4.33874	0.0035226	2.93673	0.954008	1.00864	0.237512	1.42817	2	Peptidase M16-like
Q2RQ26	Rru_A2974	0.01386	0.35072	0.00844591	0.538633	0.0139081	1.98341	0.128209	1.28908	5	Photosynthetic reaction centre M subunit
Q2RQ25	Rru_A2975	0.0837621	7.50456	0.264734	6.40386	0.986594	1.01384	0.97168	1.01165	3	Photosynthetic reaction centre protein L subunit
Q2RQ23	Rru_A2977	#N/A	#N/A	#N/A	#N/A	#N/A	#N/A	#N/A	#N/A	2	ight-harvesting protein B-870 beta chain
Q2RQ22	Rru_A2978	0.00525021	4.98518	0.127516	1.76529	0.0950725	0.555806	0.143422	1.61958	5	Chlorophyllide reductase subunit Z
Q2RQ21	Rru_A2979	0.00589563	8.28216	0.739087	1.15305	0.0912789	0.533987	0.00968238	4.45012	6	Chlorophyllide reductase subunit Y
Q2RQ20	Rru_A2980	0.000173074	3.136	0.0825887	0.622009	0.607013	0.839724	0.00751976	5.08143	6	Chlorophyllide reductase iron protein subunit X
Q2RQ19	Rru_A2981	0.162238	1.31636	0.00909817	1.2924	0.000277538	2.27055	0.000907982	1.91657	6	2-desacetyl-2-hydroxyethyl bacteriochlorophyllide
Q2RQ18	Rru_A2982	5.28344e-06	4.97615	0.0204258	1.59538	0.0414129	0.738929	0.00477618	2.11363	6	Hydroxyneurosporene-O-methyltransferase
Q2RQ17	Rru_A2983	0.00138374	3.37692	0.0397939	0.382383	0.280537	0.654486	0.0262349	6.12337	4	Farnesyl-diphosphate synthase
Q2RQ16	Rru_A2984	0.000451119	2.40353	0.0156793	1.63804	0.697262	1.02776	0.194486	1.30589	6	CrtD protein
Q2RQ15	Rru_A2985	0.000369433	0.283723	0.0534844	0.389094	0.494992	0.504162	0.118974	0.83519	4	Hydroxyneurosporene synthase
Q2RQ12	Rru_A2988	0.00345023	1.76759	0.00574027	0.680079	0.116756	0.886189	0.000171162	2.30687	1	Precorrin-6A reductase
Q2RQ11	Rru_A2989	0.178295	1.42823	0.361971	1.89982	0.89972	1.04997	0.728126	1.15248	2	Precorrin-6Y C5,15-methyltransferase (Decarboxylating) / precorrin-3 methyltransferase
Q2RQ10	Rru_A2990	0.237403	3.12947	0.0770854	3.57449	0.0802546	1.90711	0.387448	0.483272	1	Precorrin-2 C20-methyltransferase / cobalt-factor II C20-methyltransferase
Q2RQ09	Rru_A2991	0.0203316	2.69015	0.0291491	3.14922	0.644337	0.861572	0.549866	0.72637	1	Precorrin-8X methylmutase
Q2RQ08	Rru_A2992	0.671403	1.16057	0.365411	0.488379	0.280798	1.1755	0.678953	1.29523	5	Precorrin-6Y C5,15-methyltransferase (Decarboxylating)
Q2RQ07	Rru_A2993	0.859957	0.900249	0.754132	1.2787	0.408049	1.9406	0.194876	0.44569	2	Uncharacterized protein
Q2RQ06	Rru_A2994	0.179792	0.669587	0.617421	0.806451	0.833839	0.87412	0.407984	1.14578	4	Uncharacterized protein
Q2RPZ8	Rru_A3002	0.33503	0.73614	0.0166801	0.693204	0.0272698	1.48506	0.0460244	1.70917	3	Nicotinamidase
Q2RPZ7	Rru_A3003	0.788029	0.895394	0.614058	1.27147	0.400937	0.571324	0.743499	0.863264	3	Transcriptional regulator, GntR family
Q2RPZ6	Rru_A3004	0.0757812	2.61068	0.413399	1.50207	0.353868	1.30757	0.48401	1.34472	5	Aminotransferase, class I and II
Q2RPZ4	Rru_A3006	0.00629994	2.64529	0.00256769	4.17147	0.10397	1.63382	0.663731	0.880501	3	Uncharacterized protein
Q2RPZ3	Rru_A3007	0.241647	3.13724	0.0870785	7.31291	0.310833	1.6556	0.305382	1.55517	1	SOUL heme-binding protein
Q2RPZ1	Rru_A3009	0.0192459	3.77411	0.00600662	5.55519	0.464184	1.26261	0.61849	0.820427	4	Aminotransferase
Q2RPY5	Rru_A3015	0.00337626	0.581867	0.549547	0.767029	0.519172	0.582192	0.06664	0.471177	2	Twin-arginine translocation pathway signal
Q2RPY0	Rru_A3020	#N/A	#N/A	#N/A	#N/A	0.313076	2.20387	#N/A	#N/A	0	Uncharacterized protein
Q2RPX5	Rru_A3025	#N/A	#N/A	#N/A	#N/A	0.436359	1.42017	#N/A	#N/A	0	Uncharacterized protein
Q2RPX1	Rru_A3029	0.0860712	1.9444	0.0655595	1.27968	0.172131	0.676695	0.58834	1.13657	4	Glutamine--fructose-6-phosphate aminotransferase [isomerizing]
Q2RPX0	Rru_A3030	0.000223859	1.98011	0.0562384	0.692645	0.000151305	0.473986	0.092777	1.33061	6	Bifunctional protein GlmU
Q2RPW9	Rru_A3031	#N/A	#N/A	#N/A	#N/A	#N/A	#N/A	#N/A	#N/A	3	hosphoglycolate phosphatase
Q2RPW5	Rru_A3035	0.148131	0.676983	0.418348	2.43406	0.665394	1.58516	0.150331	0.502462	1	Nuclease (SNase-like)
Q2RPW4	Rru_A3036	#N/A	#N/A	#N/A	#N/A	0.840583	1.10996	#N/A	#N/A	0	Helicase c2
Q2RPW3	Rru_A3037	0.192722	0.676791	0.218358	1.38042	0.0934733	1.54245	0.20728	0.68564	5	Chemotaxis sensory transducer
Q2RPW2	Rru_A3038	0.00592732	2.60099	0.83984	0.966413	0.0641194	0.476793	0.0219785	1.49438	3	Uncharacterized protein
Q2RPW1	Rru_A3039	#N/A	#N/A	#N/A	#N/A	0.348318	0.101644	#N/A	#N/A	0	PAS/PAC sensor hybrid histidine kinase
Q2RPV8	Rru_A3042	0.0370614	0.329417	0.561189	0.547638	0.74459	1.30653	0.840081	0.871969	3	Uncharacterized protein
Q2RPV4	Rru_A3046	0.638756	1.44739	0.648571	1.61227	#N/A	#N/A	0.523715	1.78056	1	Radical SAM
Q2RPV2	Rru_A3048	4.57391e-05	2.47628	0.0895798	1.75129	0.000981153	0.339369	0.0202929	0.562882	5	Glycine dehydrogenase (Decarboxylating) beta subunit
Q2RPV1	Rru_A3049	0.000220461	0.519579	0.209228	0.392081	0.00410911	0.312653	0.043391	0.420967	4	Probable glycine dehydrogenase [decarboxylating] subunit 1
Q2RPU9	Rru_A3051	0.00120954	8.21905	0.00860969	4.08474	0.00899573	0.466467	0.783978	0.934608	5	Aminomethyltransferase
Q2RPU8	Rru_A3052	0.000592375	3.23153	0.0223511	1.88564	0.0681354	0.716291	0.492923	1.18942	3	Uncharacterized protein
Q2RPU7	Rru_A3053	8.14985e-06	2.80216	0.0889132	1.70835	0.0107447	0.630053	0.328209	1.43005	5	Homoserine kinase
Q2RPU3	Rru_A3057	0.00596876	1.78293	0.0287954	4.23002	0.0275689	3.9031	0.0389507	1.43284	3	Alkyl hydroperoxide reductase/ Thiol specific antioxidant/ Mal allergen
Q2RPU2	Rru_A3058	0.672442	0.765121	0.181294	2.30219	0.42239	1.18674	0.593366	0.702916	5	Putative suppressor for copper-sensitivity B
Q2RPU1	Rru_A3059	0.165652	0.420549	0.104481	0.63249	0.717829	1.18162	0.286745	0.58604	1	UPF0301 protein Rru_A3059
Q2RPT9	Rru_A3061	0.0740076	0.147456	0.155578	0.176077	0.747371	0.816129	0.340333	0.589495	1	Uncharacterized protein
Q2RPT8	Rru_A3062	0.000388574	2.92024	0.00578334	4.48101	0.0259371	2.61618	0.167906	1.59421	5	Methylmalonyl-CoA mutase
Q2RPT7	Rru_A3063	0.149909	0.687382	0.0492166	3.11522	0.0477545	6.1665	0.233886	0.757307	6	Crotonyl-CoA reductase
Q2RPT6	Rru_A3064	0.108659	1.32274	0.0396792	2.4074	0.049624	2.23353	0.502561	1.21657	6	Isovaleryl-CoA dehydrogenase
Q2RPT3	Rru_A3067	0.847297	0.896812	0.311833	0.391139	0.23217	2.55656	0.528116	0.678821	1	Transcriptional regulator, TetR family
Q2RPS6	Rru_A3074	0.0155861	0.374376	0.0694488	0.430159	0.961786	0.953022	0.126877	0.760592	1	4-amino-4-deoxy-L-arabinose transferase and related glycosyltransferases of PMT family-like
Q2RPS4	Rru_A3076	0.350757	1.08789	0.223259	0.929431	0.00746674	1.30801	0.0046763	1.41275	6	ATP:cob(I)alamin adenosyltransferase
Q2RPS3	Rru_A3077	0.00200665	0.740409	0.0365054	0.773368	0.0746636	1.30236	0.0142811	1.19627	5	Electron transfer flavoprotein beta-subunit
Q2RPS2	Rru_A3078	0.248029	0.662309	0.0165671	0.640336	0.108655	1.19911	0.221187	1.36122	5	Electron transfer flavoprotein
Q2RPS1	Rru_A3079	0.172814	0.877425	0.141172	1.13631	0.00715804	1.4909	0.324728	1.04963	6	3-hydroxyacyl-CoA dehydrogenase
Q2RPR7	Rru_A3083	0.185163	1.26393	0.344147	1.11444	0.768336	1.05104	0.281429	1.03447	4	NADPH-dependent FMN reductase
Q2RPR6	Rru_A3084	0.827397	1.02718	0.00380672	0.624473	0.278278	0.809305	0.0657776	1.23935	4	GTPaseDer
Q2RPR5	Rru_A3085	0.111824	2.14752	0.0872153	1.99948	0.033132	0.549174	0.493056	0.749491	4	Pyrrolo-quinoline quinone
Q2RPR4	Rru_A3086	0.348973	0.917247	0.224996	0.67912	0.0160642	0.639065	0.727717	0.92877	3	Uncharacterized protein
Q2RPQ9	Rru_A3091	#N/A	#N/A	#N/A	#N/A	0.0469707	1.53981	#N/A	#N/A	0	Glycosyl transferase, group 1
Q2RPQ8	Rru_A3092	0.59636	1.18389	0.0760013	1.89657	0.0366097	2.4492	0.280448	0.724126	3	Parallel beta-helix repeat
Q2RPQ3	Rru_A3097	0.902132	1.04076	0.262604	1.46604	0.00288606	1.98407	0.83019	0.926561	5	Uncharacterized protein
Q2RPP8	Rru_A3102	0.5262	0.784257	0.140265	3.61267	0.0724033	4.00901	0.176722	0.599394	4	Sugar transferase
Q2RPP6	Rru_A3104	#N/A	#N/A	#N/A	#N/A	0.0469538	5.49127	#N/A	#N/A	0	Two component, sigma54 specific, transcriptional regulator, Fis family
Q2RPP5	Rru_A3105	0.0419083	0.338129	0.55849	0.783033	0.0274255	3.93434	0.22233	0.616389	2	Glycosyl transferases group 1
Q2RPP3	Rru_A3107	#N/A	#N/A	#N/A	#N/A	0.120729	8.43081	#N/A	#N/A	0	Glycosyl transferase, group 1
Q2RPP2	Rru_A3108	0.112013	0.466846	0.0863788	0.498426	0.59971	1.16539	0.160779	1.63844	2	NAD-dependent epimerase/dehydratase
Q2RPN8	Rru_A3112	0.0535366	0.479952	0.839278	1.08433	0.00493961	2.14415	0.0773593	0.500716	6	4-cresol dehydrogenase (Hydroxylating)
Q2RPN6	Rru_A3114	0.775269	1.05683	0.0041976	2.53517	0.240767	1.92819	0.89241	1.03218	2	Polysaccharide deacetylase
Q2RPN5	Rru_A3115	0.850894	1.0868	0.208128	4.45755	#N/A	#N/A	0.0756427	0.150172	1	ATPase
Q2RPN4	Rru_A3116	0.0117279	0.57263	0.776795	0.936205	0.0431922	3.10082	0.969049	1.00818	3	Uncharacterized protein
Q2RPN2	Rru_A3118	0.0063518	0.509932	0.291752	1.38711	0.0483821	2.77852	0.662115	0.888935	2	Lipopolysaccharide biosynthesis
Q2RPN1	Rru_A3119	0.00759008	3.98594	0.00817977	4.90744	#N/A	#N/A	0.495527	0.765056	1	ATPases involved in chromosome partitioning-like
Q2RPN0	Rru_A3120	0.0977737	14.6374	0.000443953	11.64	0.145584	1.89642	0.414199	2.71002	1	Uncharacterized protein
Q2RPM9	Rru_A3121	0.267805	0.494107	0.572507	1.1627	0.0210257	2.7602	0.995034	1.00287	2	Asparagine synthetase
Q2RPM5	Rru_A3125	#N/A	#N/A	#N/A	#N/A	0.456753	0.694406	#N/A	#N/A	0	Glycosyl transferase, group 1
Q2RPL4	Rru_A3136	1.68734e-05	3.2464	0.252841	1.40723	0.487284	0.88398	0.126723	1.82285	4	Putative partition-related protein
Q2RPL3	Rru_A3137	0.0283276	2.88702	0.583475	1.43317	0.951943	1.02173	0.141828	1.94298	1	Diguanylate cyclase/phosphodiesterase
Q2RPL2	Rru_A3138	0.419331	0.688913	0.186481	1.74378	0.570646	1.23677	0.129893	0.362065	1	Uncharacterized protein
Q2RPK9	Rru_A3141	0.0167175	2.87321	0.0327984	2.13285	0.443681	0.811627	0.935353	1.0184	2	Homoserine dehydrogenase, NAD-binding
Q2RPK5	Rru_A3145	0.000941623	1.74661	0.00679816	2.04651	0.0320472	0.717583	0.03524	0.614875	6	Twin-arginine translocation pathway signal
Q2RPK4	Rru_A3146	0.186192	0.771768	0.00940293	1.78397	0.766831	1.1142	0.074804	0.648438	2	Uncharacterized protein
Q2RPK3	Rru_A3147	0.656317	1.07769	0.00503755	2.92837	0.0843919	1.69849	0.108935	0.635577	2	Uncharacterized protein
Q2RPK2	Rru_A3148	0.239998	1.56503	0.466414	1.29494	0.242431	1.76295	0.438872	1.45624	5	Uncharacterized protein
Q2RPK0	Rru_A3150	0.0124016	11.5273	0.000737569	6.09155	0.432145	1.15462	0.131563	2.38381	2	ABC transporter component
Q2RPJ9	Rru_A3151	0.0778848	1.70171	0.00801838	2.1716	0.52061	1.21029	0.311025	1.18632	5	Serine/threonine protein kinase
Q2RPJ8	Rru_A3152	0.25222	1.38747	0.107938	1.45734	0.276308	1.15816	0.735433	1.11956	6	Uncharacterized protein
Q2RPJ7	Rru_A3153	0.055163	2.11083	0.333395	1.46574	0.446527	1.08961	0.534361	1.44678	6	Conserved virulence factor protein
Q2RPJ6	Rru_A3154	0.0062318	2.06085	0.00792501	2.02131	0.433335	1.1151	0.615517	1.11982	5	Uncharacterized protein
Q2RPJ5	Rru_A3155	0.177378	0.838524	0.984778	1.00185	0.903897	0.986881	0.263551	0.859029	3	Uncharacterized protein
Q2RPJ4	Rru_A3156	0.00692268	1.89469	0.030641	1.84601	0.735206	0.936896	0.418468	0.805049	6	von Willebrand factor, type A
Q2RPJ3	Rru_A3157	0.00453174	2.98475	0.0180352	2.72625	0.482484	0.897713	0.59031	1.0384	3	Uncharacterized protein
Q2RPI8	Rru_A3162	0.017492	0.676826	0.00233812	0.449791	0.0493688	0.631628	0.760197	1.02123	6	Prephenate dehydratase
Q2RPI7	Rru_A3163	2.68735e-06	5.00572	0.0424093	4.45911	0.346839	0.868314	0.561154	0.881278	2	3-deoxy-manno-octulosonate cytidylyltransferase
Q2RPI5	Rru_A3165	0.0992343	0.637835	0.016923	0.404923	0.405434	1.06118	0.0412352	1.55862	3	Histidinol-phosphate phosphatase, putative, inositol monophosphatase
Q2RPI4	Rru_A3166	0.28938	1.16869	0.147077	1.27873	0.732763	1.02789	0.485893	0.892042	5	Extracellular solute-binding protein, family 5
Q2RPI1	Rru_A3169	0.0166925	2.10468	0.0490921	1.25787	0.03671	0.48527	0.832153	1.0506	2	ABC transporter component
Q2RPH9	Rru_A3171	#N/A	#N/A	#N/A	#N/A	0.128776	2.87626	#N/A	#N/A	0	Uncharacterized protein
Q2RPH7	Rru_A3173	0.0138787	0.600112	0.0353375	0.413586	0.967412	1.01784	0.410906	1.15836	3	Transcriptional regulator, TetR family
Q2RPH5	Rru_A3175	0.00325272	3.72364	0.0107066	1.88749	0.273027	0.807089	0.00295501	1.58177	6	Aspartyl/glutamyl-tRNA(Asn/Gln) amidotransferase subunit B
Q2RPH4	Rru_A3176	0.00581194	1.32572	0.00500659	0.797523	0.153484	0.877923	0.00173295	1.42892	6	Glutamyl-tRNA(Gln) amidotransferase subunit A
Q2RPH3	Rru_A3177	0.000455813	0.000274964	0.0281677	0.000150632	0.671427	1.34649	0.165977	1.56014	1	Aspartyl/glutamyl-tRNA(Asn/Gln) amidotransferase subunit C
Q2RPH2	Rru_A3178	#N/A	#N/A	#N/A	#N/A	0.746074	1.15547	#N/A	#N/A	0	Putative Holliday junction resolvase
Q2RPG7	Rru_A3183	0.0894907	0.467324	0.34632	3.06852	0.114604	2.354	0.0630322	0.366942	2	Diheme cytochrome c
Q2RPG6	Rru_A3184	0.0159223	0.359999	0.00768792	2.87092	0.00015556	11.9015	0.193778	0.694687	2	Uncharacterized protein
Q2RPG5	Rru_A3185	0.0637263	2.46233	0.0166265	5.20124	0.0663921	10.3315	0.109465	2.22118	2	Uncharacterized protein
Q2RPG4	Rru_A3186	0.0813496	1.82396	0.172111	2.15144	0.0292024	3.48596	0.448223	1.52948	2	Uncharacterized protein
Q2RPG0	Rru_A3190	0.000363509	3.59622	0.0169222	1.96399	0.0426092	0.730011	0.238063	1.39876	6	Aspartate carbamoyltransferase
Q2RPF9	Rru_A3191	0.0752781	7.77955	0.615478	1.37647	0.478507	0.800703	0.333772	4.93973	2	Dihydroorotase
Q2RPF7	Rru_A3193	0.0128691	0.821748	0.146058	0.773323	0.0217037	1.63279	0.0690791	1.54515	4	Glutathione S-transferase-like
Q2RPF6	Rru_A3194	0.0280422	0.41744	0.488945	1.11665	0.0251934	2.36333	0.821141	1.04886	2	SMF protein
Q2RPF1	Rru_A3199	0.0645718	1.39783	0.0175465	1.77957	0.153594	1.21245	0.647683	0.922606	3	Extracellular solute-binding protein, family 1
Q2RPE8	Rru_A3202	0.000255038	1.81502	0.101944	1.39202	0.143803	0.749116	0.893247	0.976358	6	DNA topoisomerase
Q2RPE7	Rru_A3203	0.0338438	0.046895	0.197027	0.0641089	0.552866	0.7086	0.987134	0.990383	1	Ribonuclease R
Q2RPE4	Rru_A3206	0.677346	1.28275	0.348423	0.480138	0.25327	0.599372	0.741081	1.24958	2	Response regulator receiver protein
Q2RPE2	Rru_A3208	0.0123128	0.406874	0.0387573	0.373467	0.156298	1.40279	0.289989	1.26784	1	Uncharacterized protein
Q2RPD6	Rru_A3214	0.18191	1.52456	0.0129967	0.714224	0.0768763	0.2466	0.0678428	0.644579	6	O-succinylhomoserine sulfhydrylase
Q2RPD5	Rru_A3215	0.201898	1.44299	0.0401064	0.53586	0.17091	0.591978	0.0286351	1.6902	1	Uncharacterized protein
Q2RPD4	Rru_A3216	4.02182e-05	3.34544	0.0258132	2.49145	0.01198	0.503231	0.445136	0.876639	6	Uncharacterized protein
Q2RP30	Rru_A3221	0.196174	0.550341	0.185208	0.554915	0.0380424	0.610489	0.521748	0.781474	6	3-methyl-2-oxobutanoate hydroxymethyltransferase
Q2RPC4	Rru_A3226	0.00195292	0.241499	0.049044	1.32462	0.194313	6.66522	0.717311	0.965441	5	Enoyl-[acyl-carrier-protein] reductase [NADH]
Q2RPC3	Rru_A3227	0.73042	0.893037	0.0887841	0.590997	0.392543	0.766594	0.406197	1.29078	6	Uncharacterized protein
Q2RPC1	Rru_A3229	0.0086944	2.29434	0.100293	1.61153	0.112839	1.31792	0.188014	1.72408	2	Two component transcriptional regulator, LuxR family
Q2RPC0	Rru_A3230	#N/A	#N/A	#N/A	#N/A	0.535435	1.24813	#N/A	#N/A	0	Diguanylate cyclase/phosphodiesterase
Q2RPB9	Rru_A3231	0.0961304	1.54082	0.136124	1.67155	0.0373822	2.33862	0.0770032	1.79943	3	ThiJ/PfpI
Q2RPB8	Rru_A3232	0.00565097	3.5536	0.0159826	1.92054	0.05797	0.573038	0.0561187	1.50357	5	Thermostable carboxypeptidase 1
Q2RPB7	Rru_A3233	0.193575	1.32426	0.148138	0.811914	0.40981	0.845076	0.0239089	1.5346	6	L-threonine synthase
Q2RPB6	Rru_A3234	0.0242704	0.144181	0.110564	0.372763	0.091006	0.642635	0.0889232	0.469794	1	Processing peptidase
Q2RPA9	Rru_A3241	0.341342	0.733223	0.023299	0.395914	0.823469	0.904274	0.0530326	1.85937	4	Chemotaxis sensory transducer
Q2RPA7	Rru_A3243	0.000221779	0.333228	0.0171732	0.218316	0.165037	0.537413	0.346419	1.17446	3	ATP synthase subunit b 1
Q2RPA1	Rru_A3249	0.0178091	0.502156	0.823614	0.955016	0.0469416	2.71488	0.0688235	1.3411	3	DSBA oxidoreductase
Q2RP99	Rru_A3251	0.6674	0.653463	0.329479	1.31083	0.561441	1.22318	0.58959	0.559129	1	A/G-specific DNA-adenine glycosylase
Q2RP98	Rru_A3252	0.0673087	1.79428	0.0219842	1.68244	0.0212372	1.433	0.00306298	1.33812	5	dTDP-glucose 4,6-dehydratase
Q2RP97	Rru_A3253	0.216601	1.73382	0.0906319	1.96543	0.490985	1.1065	0.966766	0.986064	4	MJ0042 finger-like region
Q2RP96	Rru_A3254	0.000185646	2.1093	0.416367	0.919439	0.145014	0.739699	0.00289176	1.52947	1	ABC transporter component
Q2RP95	Rru_A3255	0.187869	1.57086	0.266071	5.08894	0.288019	0.446231	0.0926656	0.286347	1	Uncharacterized protein
Q2RP93	Rru_A3257	#N/A	#N/A	#N/A	#N/A	0.83899	1.08732	#N/A	#N/A	0	1-acyl-sn-glycerol-3-phosphate acyltransferase
Q2RP92	Rru_A3258	0.0102526	1.29011	0.783587	1.15807	0.110779	0.816419	0.146831	1.21921	6	Ribonucleotide reductase large subunit
Q2RP90	Rru_A3260	0.527117	1.1671	0.0846413	1.57149	0.449063	0.897629	0.332546	0.718332	5	Uncharacterized protein
Q2RP89	Rru_A3261	#N/A	#N/A	#N/A	#N/A	0.0317013	1.86354	#N/A	#N/A	0	Uncharacterized protein
Q2RP88	Rru_A3262	0.0536313	1.74169	0.0144528	2.35578	0.0164215	2.31442	0.0884127	1.4522	4	Uncharacterized protein
Q2RP87	Rru_A3263	1.1345e-05	5.10693	0.0189893	2.06719	0.852083	0.970188	0.0379948	2.32915	2	Prephenate dehydrogenase
Q2RP86	Rru_A3264	0.0230523	0.598127	0.023657	0.458921	0.23773	0.813282	0.0244176	1.13836	5	Histidinol-phosphate aminotransferase
Q2RP85	Rru_A3265	0.0488153	1.20859	0.507637	1.03986	0.0499681	0.719028	0.0474621	0.840766	4	Chorismate mutase
Q2RP84	Rru_A3266	0.299461	1.37126	0.273579	1.33812	0.412853	0.730469	0.472922	0.849024	4	Homoserine O-acetyltransferase
Q2RP83	Rru_A3267	0.00082856	5.45815	0.0454606	1.76722	0.466386	0.76999	0.100855	2.1376	2	Methionine biosynthesis MetW
Q2RP81	Rru_A3269	0.379355	1.19096	0.561178	0.853005	0.580587	0.81793	0.186415	1.1238	2	Uncharacterized protein
Q2RP80	Rru_A3270	0.000926743	0.466122	0.0247725	1.45994	0.00076113	2.29064	0.00561726	0.669234	3	Hydroxyacylglutathione hydrolase
Q2RP79	Rru_A3271	0.000677275	3.04042	0.056498	2.92651	0.13308	1.67889	0.00263205	1.63433	4	Glutathione S-transferase family protein
Q2RP76	Rru_A3274	0.0218954	0.714419	0.0121434	1.82208	0.00662037	1.80585	0.106098	0.736661	4	Uncharacterized protein
Q2RP75	Rru_A3275	0.166905	1.72962	0.00289777	2.3688	0.065447	1.55848	0.868501	0.926072	1	Hsp33 protein
Q2RP74	Rru_A3276	0.0123647	0.698177	0.00116815	0.604066	0.0268928	0.587419	0.0349189	0.875175	5	Ornithine carbamoyltransferase
Q2RP73	Rru_A3277	0.0381961	2.26189	0.146283	2.54579	0.473607	0.781921	0.0215437	0.629026	3	Acetylornithine aminotransferase
Q2RP72	Rru_A3278	0.0253674	1.5299	0.102968	1.20178	0.0290805	0.643893	0.537044	0.903359	1	ADP-glyceromanno-heptose 6-epimerase
Q2RP71	Rru_A3279	0.000351838	0.00296125	0.0477336	0.0192359	0.42265	0	0.64247	0.890072	1	Uncharacterized protein
Q2RP69	Rru_A3281	0.562373	1.11712	0.841105	1.02904	0.175891	1.17178	0.274031	1.28181	5	Pyrroline-5-carboxylate reductase
Q2RP68	Rru_A3282	0.556557	0.800823	0.0160346	0.482433	0.870637	0.957582	0.0340036	1.70036	4	Uncharacterized protein
Q2RP67	Rru_A3283	8.22991e-06	0.214837	0.0213214	1.60663	0.00578559	3.24712	0.000231739	0.430597	5	Phasin
Q2RP66	Rru_A3284	0.351094	0.655593	0.0604714	1.57467	0.0125708	3.37762	0.492823	1.23962	2	Secretion chaperone CsaA
Q2RP65	Rru_A3285	0.00340766	2.71287	0.147811	1.24139	0.00601385	1.4945	0.0255708	3.00194	6	Response regulator receiver domain protein (CheY)
Q2RP64	Rru_A3286	0.235011	0.524204	0.00829668	0.522353	0.598591	1.08713	0.897316	0.956983	3	Uncharacterized protein
Q2RP63	Rru_A3287	0.00875119	2.0817	0.620254	1.09823	0.738724	0.946322	0.00022682	2.28186	2	Sigma-24 (FecI)
Q2RP62	Rru_A3288	0.394773	2.03453	0.362057	0.597214	0.0916606	0.623952	0.286121	1.73656	1	Signal transduction histidine kinase
Q2RP60	Rru_A3290	#N/A	#N/A	#N/A	#N/A	0.74392	1.04763	#N/A	#N/A	0	Metallophosphoesterase
Q2RP56	Rru_A3294	0.78024	1.08424	0.754789	1.2315	0.137065	1.33827	0.890171	1.117	1	KaiB
Q2RP55	Rru_A3295	0.00866379	1.89524	0.0182567	2.32095	0.118931	1.3087	0.691314	1.08401	4	Circadian clock protein KaiC
Q2RP51	Rru_A3299	0.00120964	0.615788	0.798278	1.0445	0.096319	1.48705	0.0061224	0.759765	5	Glycoside hydrolase, family 3-like
Q2RP49	Rru_A3301	0.0277754	5.66573	0.0515104	4.84885	#N/A	#N/A	0.281387	0.667419	1	Uncharacterized protein
Q2RP47	Rru_A3303	0.00412956	0.326018	0.613053	1.32082	0.122363	3.00197	0.0136045	0.43838	5	Amide-urea binding protein
Q2RP46	Rru_A3304	0.18251	2.00852	0.0444423	7.11603	0.426339	1.2568	0.414069	0.453167	1	ABC transporter component
Q2RP45	Rru_A3305	0.910902	1.10564	0.42663	0.465701	0.188145	0.503348	0.833773	1.15497	1	ABC transporter component
Q2RP39	Rru_A3311	0.390031	0.384281	0.114557	0.407569	0.558102	0.754024	0.555139	1.40501	1	Plasmid maintenance system antidote protein
Q2RP34	Rru_A3317	0.466579	1.08213	0.420417	1.16291	0.508211	0.880093	0.14456	0.857062	6	Uncharacterized protein
Q2RP33	Rru_A3318	0.106448	0.626544	0.289104	0.584421	0.100548	0.777835	0.854807	0.936924	3	Gamma-glutamyltransferase
Q2RP32	Rru_A3319	2.44219e-05	0.44276	0.0069542	0.403757	0.16245	0.71561	0.00608201	0.788845	3	Xanthine-guanine phosphoribosyltransferase
Q2RP31	Rru_A3320	9.54607e-05	0.147416	0.00340689	0.076016	0.975691	1.01706	0.821218	1.02287	3	Pantothenate synthetase
Q2RP25	Rru_A3326	0.156765	0.775325	0.9467	0.95972	0.642055	0.892962	0.653376	0.78092	2	4Fe-4S ferredoxin, iron-sulfur binding
Q2RP24	Rru_A3327	0.895039	1.10427	0.350251	0.348926	0.32736	0.556894	0.958173	0.960515	1	Uncharacterized protein
Q2RP23	Rru_A3328	0.0474513	1.32113	0.071421	1.53151	0.287926	1.17655	0.834655	1.04122	6	OmpA/MotB
Q2RP22	Rru_A3329	0.65357	0.89114	0.480107	0.319806	0.143508	0.828049	0.506438	2.73199	4	Dual-specificity RNA methyltransferase RlmN
Q2RP21	Rru_A3330	0.210676	0.680547	0.0542207	0.583203	0.628626	1.11718	0.0450008	1.46021	3	Cbb3-type cytochrome c oxidase subunit
Q2RP20	Rru_A3331	0.000846698	2.22759	0.0458763	2.43429	0.239317	1.29238	0.0238636	1.23629	5	Cytochrome C oxidase, mono-heme subunit/FixO
Q2RP19	Rru_A3332	#N/A	#N/A	#N/A	#N/A	0.937444	0.971161	#N/A	#N/A	0	Cytochrome c oxidase cbb3-type, subunit I
Q2RP18	Rru_A3333	0.000689345	0.724986	0.00405752	0.425799	0.00224394	0.532888	0.199881	0.882838	6	SAM-dependent methyltransferase
Q2RP16	Rru_A3335	0.665456	1.18711	0.134449	1.42993	0.820297	0.907374	0.708906	1.08324	2	Periplasmic Sensor Signal Transduction Histidine Kinase
Q2RP12	Rru_A3339	0.0724818	0.323586	0.0297146	0.384944	0.252543	0.804859	0.339869	0.70984	3	Membrane protein insertase YidC
Q2RP11	Rru_A3340	0.827979	0.881464	0.51098	1.52565	0.438683	1.1367	0.948887	1.04041	1	Probable GTP-binding protein EngB
Q2RP10	Rru_A3341	0.00155075	2.60656	0.405394	1.59443	0.434841	1.35181	0.0130666	1.7869	4	Acetylglutamate kinase
Q2RP09	Rru_A3342	0.00547641	0.573769	0.0751396	0.716997	0.00129419	2.00378	0.0602859	1.4252	4	4-hydroxy-tetrahydrodipicolinate synthase
Q2RP06	Rru_A3345	0.230304	0.515081	0.641383	1.30208	0.599146	1.13805	0.696426	0.850035	4	Putative diguanylate cyclase/phosphodiesterase with PAS/PAC sensor(S)
Q2RP02	Rru_A3349	0.00506595	2.90229	0.0785302	3.32384	0.651853	0.82058	0.698366	1.09925	4	Transcription activator, effector binding
Q2RP01	Rru_A3350	0.832053	0.958919	0.539033	1.14238	0.49694	1.08752	0.531919	0.866053	3	Peptide deformylase
Q2RP00	Rru_A3351	0.14496	1.42246	0.0257404	1.73995	0.836299	1.04144	0.853805	0.955556	2	Methionyl-tRNA formyltransferase
Q2RNZ5	Rru_A3356	0.0175362	0.256925	0.528312	0.755714	0.00868332	12.6401	0.225015	2.23591	4	Polyhydroxyalkanoate depolymerase
Q2RNZ3	Rru_A3358	#N/A	#N/A	#N/A	#N/A	0.0725999	1.52697	#N/A	#N/A	0	Methylated-DNA--(Protein)-cysteine S-methyltransferase
Q2RNZ1	Rru_A3360	0.949464	0.983605	0.242993	1.22077	0.90012	1.01393	0.679081	0.901564	3	Electron transport protein SCO1/SenC
Q2RNY9	Rru_A3362	0.00547793	0.357782	0.189256	1.32562	0.121819	0.789932	0.00176143	0.185111	2	Uroporphyrinogen-III C-methyltransferase
Q2RNY7	Rru_A3364	0.892699	1.02642	0.385034	0.768602	0.279822	0.827139	0.692995	0.893185	5	Uncharacterized protein
Q2RNY6	Rru_A3365	0.330408	1.18694	0.669768	0.849711	0.0855906	0.763866	0.910582	0.960052	5	Elongation factor 4
Q2RNY4	Rru_A3367	0.809158	0.926496	0.57969	0.805038	0.408726	0.80548	0.692399	0.854493	2	Cob(I)yrinic acid a,c-diamide adenosyltransferase
Q2RNY0	Rru_A3371	0.211404	1.28217	0.041134	1.83466	0.574718	1.06817	0.413783	0.806212	5	Zinc-containing alcohol dehydrogenase superfamily
Q2RNX9	Rru_A3372	5.94029e-05	4.77602	0.230044	1.67401	0.0124295	0.591998	0.434121	1.65688	2	tRNA/rRNA methyltransferase (SpoU)
Q2RNX8	Rru_A3373	7.1916e-06	0.194578	0.0377766	0.225826	0.11992	1.30699	0.946653	1.01253	4	Uncharacterized protein
Q2RNX6	Rru_A3375	0.000666915	6.30188	0.00763524	6.12547	0.523921	3.20676	0.925287	1.03929	1	Glycosyl transferase, family 9
Q2RNX5	Rru_A3376	0.698479	1.26744	0.0759584	2.26342	0.0368783	4.28784	0.256005	1.79576	5	Glycosyl transferase, group 1
Q2RNX4	Rru_A3377	0.0431254	0.82284	0.00677707	0.683021	0.230464	0.720513	0.0869466	1.15517	6	Alpha/beta hydrolase fold
Q2RNX3	Rru_A3378	0.00165903	0.560861	0.0551937	0.490727	0.385607	1.1497	0.303306	1.24182	2	Uncharacterized protein
Q2RNX1	Rru_A3380	0.635481	0.895018	0.0111232	0.559592	0.298704	1.25947	0.0213907	1.77698	3	Uncharacterized protein
Q2RNW7	Rru_A3384	0.0500859	1.47079	0.0210438	1.90174	0.488979	1.13219	0.223332	0.800839	2	Precorrin-4 C11-methyltransferase
Q2RNW4	Rru_A3387	0.501431	0.90634	0.317173	0.618563	0.0634296	0.778647	0.703699	1.14941	3	Acetyl-CoA C-acetyltransferase
Q2RNW1	Rru_A3390	0.0288751	1.68605	0.00143484	2.5547	0.131959	1.22542	0.405185	0.801872	6	Uncharacterized protein
Q2RNV9	Rru_A3392	0.346747	4.60026	0.349778	1.80116	0.720191	1.35611	0.184526	3.34244	1	Uncharacterized protein
Q2RNV5	Rru_A3396	0.547675	1.25594	0.00341083	8.20453	0.0125294	8.04187	0.413663	0.830291	5	Autoinducer synthesis protein
Q2RNV3	Rru_A3398	0.841568	1.05287	0.318247	1.69219	0.000314647	0.205137	0.00324782	0.204168	5	Transcriptional regulator, XRE family
Q2RNV1	Rru_A3400	0.00171855	0.095952	0.0469389	0.174806	0.0034256	1.99478	0.498998	0.86123	5	Thiosulphate-binding protein
Q2RNU8	Rru_A3403	0.00104579	2.52347	0.00243427	1.93006	0.673454	0.948711	0.200538	1.22391	3	Sulphate transport system permease protein 1
Q2RNU6	Rru_A3405	0.00389986	2.55477	0.00833526	3.02041	0.584934	1.08492	0.712637	0.980193	5	Formaldehyde dehydrogenase (Glutathione)
Q2RNU4	Rru_A3407	2.47626e-05	2.72372	0.000354193	1.90033	0.0118024	0.772082	0.144576	1.10117	6	6-phosphofructokinase
Q2RNU2	Rru_A3409	0.0118123	1.86247	0.0743977	1.98497	0.11517	0.754426	0.345307	0.775973	3	Uncharacterized protein
Q2RNT9	Rru_A3412	0.747468	0.817498	0.921582	0.971299	#N/A	#N/A	0.142194	0.726504	2	Amidohydrolase
Q2RNT4	Rru_A3417	0.00197831	0.55066	0.413721	0.744088	0.304836	1.31533	0.177185	0.722525	4	Extracellular ligand-binding receptor
Q2RNT2	Rru_A3419	0.00883095	2.32698	0.0256938	1.23254	0.00687559	1.88469	0.00135157	3.02044	6	Phosphoenolpyruvate carboxykinase [GTP]
Q2RNT1	Rru_A3420	0.275113	1.09162	0.112132	0.753455	0.586829	0.934133	0.39544	1.12006	6	Pyridoxamine 5'-phosphate oxidase-related, FMN-binding
Q2RNT0	Rru_A3421	0.00316591	0.234835	0.00229342	0.356738	0.05291	1.94655	0.0812221	1.27105	4	Uncharacterized protein
Q2RNS9	Rru_A3422	0.00278685	11.6166	0.0374172	2.66182	0.831736	0.961612	0.00162893	3.65778	3	Two component transcriptional regulator, winged helix family
Q2RNS8	Rru_A3423	0.0489738	1.92945	0.542328	1.244	0.779251	1.03873	0.353648	1.58636	2	Periplasmic Sensor Signal Transduction Histidine Kinase
Q2RNS7	Rru_A3424	0.0555136	1.95002	0.0206163	2.34495	0.932875	0.986253	0.673474	0.849619	5	Orotidine 5'-phosphate decarboxylase
Q2RNS6	Rru_A3425	0.0465879	0.692193	0.0385407	0.568607	0.501373	1.21139	0.0744106	1.45023	1	N-(5'-phosphoribosyl)anthranilate isomerase
Q2RNS5	Rru_A3426	0.686845	0.893756	0.821312	1.15263	0.74853	1.26398	0.0926097	0.697223	5	Uncharacterized protein
Q2RNS4	Rru_A3427	0.9078	1.00948	0.172915	0.760176	0.179646	0.829488	0.480257	1.11506	6	Tryptophan synthase beta chain
Q2RNS3	Rru_A3428	0.157897	1.93659	0.115344	0.857001	0.404089	0.774039	0.0757553	1.3265	6	Tryptophan synthase alpha chain
Q2RNS1	Rru_A3430	0.0432772	0.748302	0.000103229	0.454801	0.00470724	0.49689	0.0784854	0.79086	6	Acetyl-coenzyme A carboxylase carboxyl transferase subunit beta
Q2RNS0	Rru_A3431	0.431572	1.15814	0.23928	0.558725	0.918313	0.984776	0.21287	1.26973	1	Folylpolyglutamate synthetase
Q2RNR8	Rru_A3433	7.03083e-06	0.253158	0.0546314	0.417805	0.462652	1.16751	0.238668	0.783838	6	Thioredoxin
Q2RNR5	Rru_A3436	0.199598	0.46298	0.450793	0.563875	0.985316	0.992619	0.86471	0.903526	2	Nucleotidyl transferase
Q2RNR2	Rru_A3439	0.189916	1.33958	0.957314	0.979424	0.719645	0.924917	0.835394	1.0876	4	Ferredoxin--NADP reductase
Q2RNR0	Rru_A3441	0.0218724	1.98023	0.00107034	2.07509	0.200022	1.14278	0.389169	1.25788	3	Transcriptional regulator, PadR family
Q2RNQ7	Rru_A3444	0.00714613	2.32917	0.002806	2.25442	0.0112984	1.89905	0.0383609	1.71669	6	Adenosylhomocysteinase
Q2RNQ6	Rru_A3445	0.013617	1.76674	0.0108802	1.71356	0.148149	0.80734	0.930786	0.981136	6	Phosphoenolpyruvate-protein phosphotransferase
Q2RNQ4	Rru_A3447	0.00584312	1.50443	0.165876	1.21372	0.104127	1.27907	0.0311975	1.53909	2	PTS system fructose subfamily IIA component
Q2RNQ3	Rru_A3448	0.00368563	2.10122	0.0514509	2.13365	0.666233	0.884501	0.619276	0.878935	5	UPF0042 nucleotide-binding protein Rru_A3448
Q2RNQ2	Rru_A3449	0.0125427	6.6503	0.00213556	5.96517	0.0386594	2.11465	0.140299	2.15817	3	Hpr(Ser) kinase/phosphatase
Q2RNQ1	Rru_A3450	0.850672	1.07931	0.130609	3.42204	0.180022	3.25927	0.332994	0.595175	4	Ribonuclease T2
Q2RNP9	Rru_A3452	0.0133198	2.35671	0.00454363	2.83379	0.87844	1.03408	0.595571	1.2008	3	TonB-dependent receptor
Q2RNP8	Rru_A3453	0.15927	2.36349	0.942765	0.970273	0.0324792	0.458924	0.294743	1.71356	2	ABC transporter component
Q2RNP5	Rru_A3456	0.646556	0.903931	0.365716	0.850154	0.0097608	1.37562	0.232873	1.33405	5	Uncharacterized protein
Q2RNP4	Rru_A3457	0.00218563	2.26951	0.000339839	3.96692	0.101504	0.779901	0.0660217	0.478993	5	Uncharacterized protein
Q2RNP2	Rru_A3459	8.93462e-05	0.0637585	0.00191592	0.058108	#N/A	#N/A	0.0623043	1.39695	2	Uncharacterized protein
Q2RNP1	Rru_A3460	0.215688	0.512831	0.00814547	2.0638	0.44326	0.560905	0.554055	0.795731	1	Cyclic nucleotide-binding domain (CNMP-BD) protein
Q2RNP0	Rru_A3461	0.37715	1.22174	0.39133	0.859212	0.651237	0.887346	0.16002	1.32118	1	Carbohydrate kinase, FGGY
Q2RNN9	Rru_A3462	0.000806088	0.713962	0.630986	1.07507	0.242715	1.21892	0.0124713	0.770525	5	Cold-shock DNA-binding protein family
Q2RNN5	Rru_A3466	0.707087	1.10106	0.74649	0.926066	0.0532974	1.34675	0.161413	1.67277	3	Ornithine aminotransferase
Q2RNN2	Rru_A3469	0.00453582	0.13124	0.0407572	0.336476	0.0225411	2.80129	0.337912	1.26026	3	Uncharacterized protein
Q2RNN1	Rru_A3470	#N/A	#N/A	#N/A	#N/A	0.195814	0.517566	#N/A	#N/A	0	Uncharacterized protein
Q2RNM9	Rru_A3472	0.00154977	0.157271	0.0813187	0.103108	0.358025	0.753099	0.826298	1.07517	2	Nucleoid-associated protein Rru_A3472
Q2RNM8	Rru_A3473	8.67038e-05	2.74607	0.404694	1.16002	0.0447893	0.664688	0.0364505	1.4541	4	DNA-directed DNA polymerase
Q2RNM7	Rru_A3474	0.0201347	0.374925	0.145098	0.725107	0.496467	1.10654	0.0608484	0.596067	4	Bacterioferritin
Q2RNM6	Rru_A3475	0.0368627	7.98786	0.0317443	4.97812	0.562338	0.731888	0.378442	1.35586	1	Cysteine desulfuration protein SufE
Q2RNM3	Rru_A3478	0.0012422	4.56948	0.219045	1.51628	0.234902	1.41275	0.496588	1.33174	3	Putative diguanylate cyclase (GGDEF domain) with PAS/PAC sensor domain
Q2RNM2	Rru_A3479	0.0132491	1.64314	0.422236	1.13046	0.132208	0.792659	0.269879	1.21471	5	2,3,4,5-tetrahydropyridine-2,6-dicarboxylate N-succinyltransferase
Q2RNL3	Rru_A348	0.000285886	0.310775	0.00388898	0.219986	0.531746	0.794243	0.855322	0.97863	5	Translation initiation factor IF-3
Q2RNM1	Rru_A3480	0.531483	0.86581	0.56421	1.11294	0.70926	0.952865	0.769871	0.94008	5	Succinyl-diaminopimelate desuccinylase
Q2RNL9	Rru_A3482	0.018827	0.605955	0.879743	0.912596	0.183989	0.789528	0.140009	0.523071	1	Transcriptional regulator, MarR family
Q2RNL6	Rru_A3485	0.116245	1.40104	0.0161329	0.683461	0.0485625	0.612492	0.046407	1.38892	3	Uncharacterized protein
Q2RNL4	Rru_A3487	#N/A	#N/A	#N/A	#N/A	#N/A	#N/A	#N/A	#N/A	5	hreonine--tRNA ligase
Q2RNL2	Rru_A3489	0.405918	0.518469	0.449376	0.268819	0.530001	0.69991	0.631441	1.81813	1	Uncharacterized protein
Q2RNL0	Rru_A3491	0.0412012	5.73925	0.153165	2.25365	#N/A	#N/A	0.0124878	5.50519	2	Uncharacterized protein
Q2RNK3	Rru_A3498	0.535279	1.15123	0.157745	0.76879	0.160878	0.570002	0.18319	0.898803	6	Ubiquinone biosynthesis protein COQ7
Q2RNJ7	Rru_A3504	0.00020327	0.470261	0.0252815	0.63754	0.0749605	1.38277	0.884222	0.98618	6	Putative phenylacetate-CoA ligase
Q2RNJ6	Rru_A3505	0.444716	1.91091	0.560588	1.45288	0.962406	1.02075	0.528356	1.48172	1	ABC transporter component
Q2RNJ5	Rru_A3506	0.000536036	0.141412	0.501906	1.26721	0.15357	3.8596	0.000525755	0.367178	5	Putative branched-chain amino acid transport system substrate-binding protein
Q2RNJ2	Rru_A3509	0.0155356	0.369772	0.418162	0.562687	0.261216	1.38575	0.744974	1.19537	1	AMP-dependent synthetase and ligase
Q2RNJ1	Rru_A3510	0.0308418	6.68967	0.135605	14.2707	0.143145	1.75972	0.197503	0.258721	1	ABC transporter component
Q2RNJ0	Rru_A3511	0.000247176	2.55097	0.0127544	2.46787	0.160291	1.23915	0.0668202	1.25247	6	Aconitase
Q2RNI9	Rru_A3512	0.00861477	1.36106	0.0215274	1.79471	0.0398735	2.14798	0.00331393	1.40527	5	Glutamine amidotransferase class-I
Q2RNI8	Rru_A3513	0.336255	1.161	0.483345	0.795536	0.251911	0.677151	0.307912	1.31845	4	Chemotaxis sensory transducer
Q2RNI7	Rru_A3514	0.00234048	2.54963	0.0330276	2.17767	0.340305	0.838377	0.629314	1.1859	5	DNA polymerase A
Q2RNI0	Rru_A3521	0.00116819	0.290703	0.0184096	0.215501	0.0224667	0.540099	0.0878027	0.742304	2	50S ribosomal protein L35
Q2RNH9	Rru_A3522	0.0047535	0.304909	0.254745	0.327392	0.0023723	0.520199	0.163824	0.532921	4	50S ribosomal protein L20
Q2RNH8	Rru_A3523	0.0025618	1.39819	0.329139	0.867436	0.00315308	0.613305	0.899953	1.01616	5	Phenylalanine--tRNA ligase alpha subunit
Q2RNH7	Rru_A3524	8.99694e-05	3.36887	0.0490634	1.60295	0.0574653	0.621562	0.0823713	1.47202	5	Phenylalanine--tRNA ligase beta subunit
Q2RNH0	Rru_A3531	0.0845995	0.695902	0.230341	0.758359	0.324522	0.834939	0.610843	0.902909	3	Nitrogen-fixing NifU-like
Q2RNG9	Rru_A3532	0.012332	2.72243	0.0618522	1.89642	0.481928	1.61528	0.355173	1.49272	3	UspA
Q2RNG8	Rru_A3533	0.261635	0.446553	0.748714	0.911612	0.0774938	0.667339	0.199803	0.342648	1	Uncharacterized protein
Q2RNG7	Rru_A3534	0.0109623	4.34927	0.043627	4.00129	0.19156	5.51287	0.922606	0.961979	2	Uncharacterized protein
Q2RNG6	Rru_A3535	0.00372081	1.87642	0.518054	1.08911	0.228849	0.847375	0.565302	0.921225	6	Tryptophan--tRNA ligase
Q2RNG5	Rru_A3536	0.170145	5.20852	0.158941	1.69695	#N/A	#N/A	0.411936	0.693857	1	Cob(II)yrinic acid a,c-diamide reductase
Q2RNG0	Rru_A3541	0.813214	1.07595	0.0943933	1.20888	0.933856	0.991124	0.703673	1.12045	2	DNA mismatch repair protein MutS
Q2RNF9	Rru_A3542	9.61274e-05	3.14084	0.0630757	1.59118	0.0164516	0.609104	0.694514	1.09755	5	Malate dehydrogenase
Q2RNF7	Rru_A3544	0.00165898	0.508615	0.00325581	0.255793	0.386879	0.845677	0.00526327	1.6889	5	Phosphate-specific transport system accessory protein PhoU
Q2RNF5	Rru_A3546	0.0137678	0.269903	0.713753	0.7056	0.390983	0.601157	0.00352449	0.135569	1	Anthranilate synthase, component II
Q2RNF4	Rru_A3547	0.460596	1.395	0.588636	1.39377	0.888609	1.02839	0.837227	0.928369	3	Uncharacterized protein
Q2RNF3	Rru_A3548	0.000122881	6.21152	0.0211422	1.7719	0.180874	1.21584	0.0256743	4.23443	6	Magnesium-protoporphyrin IX monomethyl ester anaerobic oxidative cyclase
Q2RNF2	Rru_A3549	0.574788	0.766257	0.768572	1.15178	0.473627	0.835985	0.374228	0.589082	4	Cobyric acid synthase
Q2RNF1	Rru_A3550	0.612686	0.854741	0.643468	0.895888	0.416552	0.878755	0.573312	0.825036	2	Cobyric acid synthase
Q2RNF0	Rru_A3551	0.00839104	2.8504	0.0875823	2.09509	0.13888	1.74894	0.00183712	2.24525	4	Aldo/keto reductase
Q2RNE7	Rru_A3554	0.0127916	0.731121	0.0115956	0.416773	0.074099	0.70204	0.0648434	1.28829	6	Chaperone protein DnaJ
Q2RNE6	Rru_A3555	0.948068	0.995851	0.0346225	0.569404	0.130918	0.636763	0.240042	1.20784	6	Chaperone protein DnaK
Q2RNE5	Rru_A3556	0.113796	0.655797	0.0372171	0.320429	0.242613	2.50958	0.0338577	4.47812	3	Uncharacterized protein
Q2RND9	Rru_A3562	0.610798	1.08415	0.431465	0.743128	0.437472	0.845388	0.503299	1.20556	4	Uncharacterized protein
Q2RND8	Rru_A3563	0.0172892	2.88352	0.293013	0.423395	0.0483283	0.312363	0.379503	1.84868	1	Chemotaxis sensory transducer
Q2RND5	Rru_A3566	0.0381653	0.71962	0.627263	1.07025	0.961999	1.00676	0.0420737	0.70521	6	HemY-like
Q2RND4	Rru_A3567	0.00892394	1.66889	0.10309	1.47441	0.510217	0.914926	0.20964	1.12368	6	Uroporphyrinogen III synthase HEM4
Q2RND3	Rru_A3568	0.0288728	1.37435	0.56874	0.938889	0.415707	0.905018	0.013287	1.22162	6	Porphobilinogen deaminase
Q2RND0	Rru_A3571	0.0329954	3.67158	0.0271399	3.18177	0.204903	1.25657	0.684382	1.10568	4	Glycerol-3-phosphate dehydrogenase [NAD(P)+]
Q2RNC9	Rru_A3572	0.000553409	0.537721	0.0811809	0.405511	0.465833	0.921557	0.456325	1.20689	1	YCII-related
Q2RNC8	Rru_A3573	0.000589813	0.179922	0.00298613	0.205248	0.799677	1.1795	0.342442	1.11959	2	Uncharacterized protein
Q2RNC6	Rru_A3575	0.000156811	0.75609	0.137721	1.80814	0.14627	1.80024	0.0270525	0.747826	6	Acetyl-coenzyme A synthetase
Q2RNC5	Rru_A3576	0.00344675	5.59837	0.398458	1.65103	0.155678	0.507794	0.384484	2.06548	1	UDP-glucuronate 5'-epimerase
Q2RNC2	Rru_A3579	0.71806	0.884617	0.870133	0.935105	0.731493	1.145	0.850331	1.09534	5	Protease HtpX homolog
Q2RNC0	Rru_A3581	#N/A	#N/A	#N/A	#N/A	#N/A	#N/A	#N/A	#N/A	2	Putative pterin-4-alpha-carbinolamine dehydratase
Q2RNB9	Rru_A3582	0.45785	1.37827	0.0438577	4.95181	0.474128	1.14072	0.233321	0.410173	3	Uncharacterized protein
Q2RNB8	Rru_A3583	0.00316341	1.77893	0.180025	0.276728	0.0743921	0.769007	0.178626	3.70577	2	ATP-dependent protease-like
Q2RNB6	Rru_A3585	#N/A	#N/A	#N/A	#N/A	#N/A	#N/A	#N/A	#N/A	2	hosphatidylserine decarboxylase proenzyme
Q2RNB5	Rru_A3586	0.00392301	1.77281	0.877201	0.927404	0.00609865	0.693067	0.537659	1.43223	4	Peptidoglycan-binding LysM
Q2RNB3	Rru_A3588	0.0149799	0.542476	0.246474	0.658854	0.438246	1.43932	0.0746555	1.26935	2	Cytochrome B561
Q2RNB0	Rru_A3591	0.771661	1.14086	0.0828211	2.69268	0.0610729	2.92651	0.99474	1.00291	1	Uncharacterized protein
Q2RNA9	Rru_A3592	0.047231	0.323598	0.00465775	0.385195	0.146205	1.54175	0.514314	1.16775	3	Histidine triad (HIT) protein
Q2RNA8	Rru_A3593	#N/A	#N/A	#N/A	#N/A	0.428924	1.90626	#N/A	#N/A	0	Phosphoribosyl-ATP pyrophosphatase
Q2RNA7	Rru_A3594	0.00207015	2.49179	0.00246538	2.44741	0.0646182	1.19826	0.0539915	1.29591	3	Imidazoleglycerol phosphate synthase subunit HisF
Q2RNA6	Rru_A3595	0.00445991	1.91287	0.0324986	2.02164	0.213696	1.26867	0.00795664	1.15618	3	1-(5-phosphoribosyl)-5- imidazole-4-carboxamide isomerase
Q2RNA5	Rru_A3596	0.780751	1.02812	0.29578	0.837814	0.513249	0.937397	0.541776	1.08891	3	Imidazoleglycerol phosphate synthase subunit HisH
Q2RNA4	Rru_A3597	0.000364074	0.367595	0.784129	0.877127	0.15186	0.435479	0.0988373	1.10693	2	Imidazoleglycerol-phosphate dehydratase
Q2RNA3	Rru_A3598	0.30244	1.1808	0.508259	1.07089	0.247333	0.305572	0.00243604	0.601391	4	Transcriptional regulator, XRE family
Q2RNA2	Rru_A3599	0.00188211	1.90883	0.58796	1.07519	0.231209	0.736268	0.350834	1.129	4	ATP-dependent protease subunit HslV
Q2RNA1	Rru_A3600	0.00352569	1.4254	0.378035	0.922177	0.0543981	0.806674	0.0208255	1.26131	6	ATP-dependent protease ATPase subunit HslU
Q2RN98	Rru_A3603	0.0145977	13.1237	0.0802347	4.25567	0.121162	0.778285	0.253016	2.0465	2	Uncharacterized protein
Q2RN96	Rru_A3605	0.443577	0.748425	0.147855	0.473772	0.62044	0.746829	0.859241	0.937532	1	Iron-sulfur cluster binding protein
Q2RN95	Rru_A3606	0.0065542	2.21769	0.807685	1.01677	0.105964	0.686515	0.119077	1.44421	4	Uncharacterized protein
Q2RN94	Rru_A3607	0.000643778	6.45632	0.0134002	9.64723	0.0886	0.51488	0.589004	0.731059	1	Murein degrading transglycosylase protein
Q2RN93	Rru_A3608	0.000364692	1.81605	0.174589	1.2086	0.00343511	0.780786	0.180144	1.24796	6	Uncharacterized protein
Q2RN92	Rru_A3609	0.0231008	2.76908	0.28273	2.52097	0.226077	0.541042	0.673645	0.870059	1	FxsA cytoplasmic membrane protein
Q2RN91	Rru_A3610	0.40946	0.944239	0.00505519	0.569348	0.00265546	0.627925	0.80504	0.987226	4	Protein-export protein SecB
Q2RN90	Rru_A3611	0.214404	2.78024	0.594883	0.728835	0.114924	0.656806	0.144481	2.90199	1	DNA polymerase III, epsilon subunit
Q2RN88	Rru_A3613	0.264419	0.683109	0.679852	1.66435	0.688118	1.09896	0.936088	1.01439	2	Shikimate dehydrogenase
Q2RN86	Rru_A3615	0.00041516	0.476901	0.0547526	0.612002	0.286143	0.913924	0.0817196	0.762896	4	Putative pyruvate, phosphate dikinase regulatory protein
Q2RN85	Rru_A3616	0.00606914	1.56699	0.00277281	2.05383	0.521175	0.924187	0.00508892	0.710803	6	Uroporphyrinogen decarboxylase
Q2RN84	Rru_A3617	0.00719329	0.474591	0.00193466	0.390966	0.684632	0.912871	0.100434	1.23982	2	Ferrochelatase
Q2RN82	Rru_A3619	0.00641996	3.17347	0.00163944	2.16975	0.0196329	0.622444	0.271821	0.855822	6	Transcription termination factor Rho
Q2RN81	Rru_A3620	0.0104174	1.69255	0.252288	1.12419	0.475721	1.5042	0.0302235	1.49385	6	Zinc-containing alcohol dehydrogenase superfamily
Q2RN79	Rru_A3622	0.0115611	1.6801	0.193014	1.23954	0.398265	0.905316	0.167232	1.30477	5	Uncharacterized protein
Q2RN78	Rru_A3623	0.0196816	0.423306	0.60856	0.832802	0.23843	2.45087	0.636776	1.16475	3	Uncharacterized protein
Q2RN77	Rru_A3624	0.240448	1.12826	0.770277	0.96337	0.00173631	0.330604	0.00276558	0.392449	5	tRNA modification GTPase MnmE
Q2RN76	Rru_A3625	0.18727	2.36133	0.321656	1.91846	0.816684	1.10964	0.812524	0.927989	2	tRNA uridine 5-carboxymethylaminomethyl modification enzyme MnmG
Q2RN75	Rru_A3626	0.0132941	2.73341	0.0558213	2.43137	0.202853	1.15478	0.0762842	1.3393	3	Ribosomal RNA small subunit methyltransferase G
Q2RN74	Rru_A3627	0.398616	0.518199	0.182526	0.625144	0.0432517	1.65963	0.936354	0.955699	3	Chromosome segregation ATPase
Q2RN73	Rru_A3628	0.0751149	0.846555	0.0853938	0.635291	0.400636	0.814072	0.392913	1.09409	5	Chromosome segregation DNA-binding protein
Q2RN70	Rru_A3631	0.00391279	2.5915	0.0948897	1.26387	0.994683	1.00094	0.0226102	1.77183	6	Leucine--tRNA ligase
Q2RN67	Rru_A3634	2.29383e-05	2.82416	0.000612086	2.3663	0.0392496	1.22886	0.0499382	1.5328	2	Uncharacterized protein
Q2RN64	Rru_A3637	0.00015171	2.40259	0.101403	1.71912	0.526785	1.12542	0.313073	1.56997	3	GTP cyclohydrolase II
Q2RN61	Rru_A3640	#N/A	#N/A	#N/A	#N/A	0.931398	0.931702	#N/A	#N/A	0	Non-canonical purine NTP pyrophosphatase
Q2RN60	Rru_A3641	0.134834	0.385141	0.288077	0.333364	0.599034	1.45846	0.66324	1.33425	1	Ribonuclease PH
Q2RN59	Rru_A3642	0.00588732	2.8589	0.631494	1.12364	0.0327485	0.603306	0.401278	1.30015	6	Heat-inducible transcription repressor hrcA
Q2RN58	Rru_A3643	0.00891206	1.36931	0.247498	0.805259	0.0807	0.618943	0.517999	0.911122	6	Protein GrpE
Q2RN56	Rru_A3645	0.18297	1.64339	0.111876	0.487688	0.356809	0.420454	0.229678	1.51454	1	Silent information regulator protein Sir2
Q2RN55	Rru_A3646	0.0213847	0.666321	0.000444381	0.479602	0.0342437	1.65614	0.000277309	1.86347	2	Protein tyrosine phosphatase
Q2RN52	Rru_A3649	0.000185398	0.44874	0.0148408	0.223436	0.830329	0.963185	0.0426856	1.78001	4	2',5' RNA ligase
Q2RN51	Rru_A3650	0.817875	1.04825	0.103905	1.75855	0.139879	1.67744	0.211531	1.3034	4	Lipolytic enzyme, G-D-S-L
Q2RN50	Rru_A3651	0.14646	0.469158	0.367753	0.368899	0.721563	0.885867	0.647397	0.754615	1	ABC transporter component
Q2RN48	Rru_A3653	0.544658	0.810668	0.467382	6.04591	0.0904703	0.611421	0.203255	1.47279	1	Uncharacterized protein
Q2RN46	Rru_A3655	0.000596171	2.68617	0.00101288	1.76831	0.01167	0.739954	0.379705	1.07417	6	Bifunctional purine biosynthesis protein PurH
Q2RN45	Rru_A3656	0.32226	0.670519	0.408031	0.380647	0.393703	1.27825	0.601652	1.5859	5	Polysaccharide biosynthesis protein CapD
Q2RN43	Rru_A3658	#N/A	#N/A	#N/A	#N/A	0.312535	0.47432	#N/A	#N/A	0	Glycosyl transferase, group 1
Q2RN41	Rru_A3660	0.0019173	6.9865	0.0332281	4.68595	0.332398	0.822057	0.313043	1.28083	2	tRNA and rRNA cytosine-C5-methylase
Q2RN39	Rru_A3662	0.591435	1.06884	0.0928099	0.48991	0.0452569	0.630859	0.537866	1.08139	1	Uncharacterized protein
Q2RN38	Rru_A3663	3.61453e-05	3.34982	0.0671261	1.95442	0.189602	0.818371	0.0458666	1.28795	6	Glutamate dehydrogenase (NAD)
Q2RN36	Rru_A3665	0.00642852	0.228823	0.237084	0.448648	0.528175	0.744308	0.06284	0.477894	1	Chemotaxis sensory transducer
Q2RN34	Rru_A3667	0.412858	0.807714	0.242974	1.94811	0.0414572	2.25424	0.674824	0.880204	4	Short-chain dehydrogenase/reductase SDR
Q2RN33	Rru_A3668	0.000654907	0.299809	0.0585267	0.566536	0.512504	1.41834	0.752882	0.957134	1	Uncharacterized protein
Q2RN31	Rru_A3670	0.896091	0.976607	0.808821	0.953418	0.27915	0.713482	0.209443	0.796129	2	Potassium efflux system protein
Q2RN30	Rru_A3671	0.952526	1.01181	0.349944	0.782981	0.522902	1.0783	0.245835	1.42646	5	Protein translocase subunit secD / protein translocase subunit secF
Q2RN28	Rru_A3673	0.124648	0.198854	0.0580212	0.246492	0.185249	0.350403	0.703141	0.828671	1	Glutaconyl-CoA decarboxylase
Q2RN26	Rru_A3675	9.62493e-05	7.32903	0.264619	1.91739	0.154197	0.690533	0.250565	2.87443	2	Glutathione S-transferase-like
Q2RN24	Rru_A3677	#N/A	#N/A	#N/A	#N/A	0.0704162	0.686913	#N/A	#N/A	0	Tripartite ATP-independent periplasmic transporter, DctQ component
Q2RN23	Rru_A3678	0.000789116	0.101692	0.0036608	0.229143	0.066757	1.69516	0.00304159	0.53749	5	TRAP dicarboxylate transporter-DctP subunit
Q2RN20	Rru_A3681	0.0267916	0.647659	0.242916	0.769799	0.214518	1.46514	0.610125	1.07776	6	YceI
Q2RN18	Rru_A3683	0.0235172	0.465132	0.0235662	0.464346	0.0845144	1.47628	0.104431	0.745441	3	YceI
Q2RN17	Rru_A3684	0.0346996	4.68522	0.195677	1.95585	0.907066	0.976893	0.403086	2.17989	1	Sulfotransferase
Q2RN12	Rru_A3689	0.232964	1.3473	0.955709	0.980693	0.166554	1.9415	0.291509	1.60317	1	MaoC-like dehydratase
Q2RN11	Rru_A3690	3.95446e-05	0.504053	0.0403239	0.455718	0.239912	0.815842	0.488895	0.898949	2	Glutathione synthetase
Q2RN08	Rru_A3693	0.004667	3.14212	0.000846386	4.52865	0.614535	0.90896	0.212249	0.654661	1	Ribosomal RNA small subunit methyltransferase I
Q2RN07	Rru_A3694	0.0164224	3.68352	0.0011969	3.21071	0.0900019	1.22516	0.275639	1.24231	5	Uncharacterized protein
Q2RN06	Rru_A3695	0.00442796	3.47954	0.0102081	7.82424	0.0405367	2.42749	0.533105	1.08432	6	Acetoacetyl-CoA synthase
Q2RN04	Rru_A3697	0.000216998	8.39574	0.0122438	3.07156	0.724663	0.880724	0.141293	1.92851	3	Fumarylacetoacetate (FAA) hydrolase
Q2RN03	Rru_A3698	0.821424	0.971685	0.000683015	0.574265	0.663158	1.0515	0.000318078	1.73512	3	Outer membrane lipoprotein carrier protein LolA
Q2RN02	Rru_A3699	#N/A	#N/A	#N/A	#N/A	0.75543	0.913552	#N/A	#N/A	0	Acriflavin resistance protein
Q2RN01	Rru_A3700	0.0086602	0.680381	0.823627	1.05077	0.619102	1.09289	0.0655853	0.735313	4	Secretion protein HlyD
Q2RN00	Rru_A3701	0.0278123	2.061	0.59097	1.35788	0.68382	0.961456	0.665063	1.39629	2	Transcriptional regulator, TetR family
Q2RMZ7	Rru_A3704	0.36599	1.74194	0.543018	1.38278	0.710845	1.29192	0.663122	1.31631	5	Periplasmic solute binding protein
Q2RMZ5	Rru_A3706	0.00536111	1.20446	0.104851	1.34321	0.817266	1.01407	0.563652	0.915825	5	Aminotransferase
Q2RMZ4	Rru_A3707	0.000285808	3.68604	0.0216416	1.90013	0.0308044	0.707149	0.11217	1.55851	6	2-octaprenyl-3-methyl-6-methoxy-1,4-benzoquinol hydroxylase
Q2RMZ2	Rru_A3709	0.798644	1.28798	0.339477	2.3002	0.624066	1.60842	0.283413	1.13383	1	UPF0434 protein Rru_A3709
Q2RMZ1	Rru_A3710	4.93806e-06	4.15709	0.0130946	3.40479	0.445472	1.11891	0.237319	1.35211	6	Peptidase S16, lon-like
Q2RMZ0	Rru_A3711	0.132938	1.37388	0.790681	1.03715	0.38139	1.08542	0.293715	1.27465	5	Thioredoxin-related
Q2RMY6	Rru_A3715	0.124059	0.233389	0.562992	0.657929	0.0646797	1.535	0.684616	0.77174	1	Lipopolysaccharide biosynthesis
Q2RMY2	Rru_A3719	0.0892745	2.98705	0.147266	2.09201	0.442784	1.45375	0.410405	1.35227	1	Methyltransferase FkbM
Q2RMX6	Rru_A3725	0.469742	0.678989	0.192955	0.326162	0.502951	1.10498	0.377137	1.69986	3	ABC transporter component
Q2RMX3	Rru_A3728	9.37532e-06	0.315986	0.645919	0.865605	0.0204084	2.22169	0.208964	0.695512	4	Extracellular ligand-binding receptor
Q2RMX2	Rru_A3729	0.944293	0.982169	0.601533	1.20842	0.0951555	1.6821	0.482205	1.37776	4	Creatininase
Q2RMX1	Rru_A3730	0.146733	0.232218	0.285545	0.335087	0.47365	0.738664	0.616242	0.723781	3	Asparaginase
Q2RMW9	Rru_A3732	0.868146	1.06738	0.277284	1.51678	0.925215	1.03882	0.405083	0.637677	1	Uncharacterized protein
Q2RMW6	Rru_A3735	0.0190696	1.83745	0.44658	0.716871	0.983111	1.00339	0.0813917	1.51985	2	Uncharacterized protein
Q2RMW2	Rru_A3739	0.00131477	2.68363	0.0104756	1.99115	0.901908	0.984802	0.0158962	1.34606	6	Uncharacterized protein
Q2RMW0	Rru_A3741	0.284984	1.26407	0.831105	0.954418	0.172941	0.851454	0.559167	1.14482	5	3-dehydroquinate synthase
Q2RMV7	Rru_A3744	0.661463	0.901824	0.292265	2.17225	0.284756	2.75011	0.679	0.890603	3	Predicted signal-transduction protein containing CBS domains
Q2RMV5	Rru_A3746	0.00335083	0.394788	0.000866712	0.253413	0.243744	0.55207	0.487157	0.916761	6	50S ribosomal protein L25
Q2RMV4	Rru_A3747	#N/A	#N/A	#N/A	#N/A	#N/A	#N/A	#N/A	#N/A	2	eptidyl-tRNA hydrolase
Q2RMV3	Rru_A3748	2.70709e-06	2.45	0.000341613	2.14266	0.0845552	0.774288	0.406722	0.921164	6	Uncharacterized protein
Q2RMV2	Rru_A3749	0.00476034	2.16004	0.116468	2.26954	0.107964	1.33115	0.825167	1.14489	3	Uncharacterized protein
Q2RMV0	Rru_A3751	0.00065781	1.84757	0.202908	1.16775	0.093103	0.814759	0.119412	1.26082	6	Argininosuccinate synthase
Q2RMU9	Rru_A3752	0.0766872	6.41081	0.005928	18.2346	0.0144125	5.82609	0.821576	1.11492	1	Uncharacterized protein
Q2RMU6	Rru_A3755	0.00688751	0.682176	0.00559563	0.459764	0.0305107	0.559701	0.0654913	0.822143	1	Heat shock protein Hsp20
Q2RMT9	Rru_A3762	#N/A	#N/A	#N/A	#N/A	0.16265	0.828134	#N/A	#N/A	0	Peptidase M15D, vanX D-ala-D-ala dipeptidase
Q2RMT6	Rru_A3765	0.277334	0.484869	0.0727383	2.54197	0.134144	3.01889	0.0900565	0.162336	1	Uncharacterized protein
Q2RMT5	Rru_A3766	0.846166	1.02628	0.0105067	0.707753	0.0411535	0.741045	0.0404237	1.18476	5	Transcriptional regulator, MucR family
Q2RMT4	Rru_A3767	0.00020745	0.385424	0.00118444	0.251219	0.447566	0.821913	0.0401417	1.31759	3	Ferric uptake regulator (FUR) family
Q2RMT3	Rru_A3768	0.000877285	1.5222	0.208596	1.80843	0.170056	1.32442	0.14765	0.758547	5	Ornithine-acyl[acyl carrier protein] N-acyltransferase
Q2RMT1	Rru_A3770	0.0221022	3.4228	0.00825653	2.15097	0.0718045	0.744516	0.948507	1.02298	1	(Dimethylallyl)adenosine tRNA methylthiotransferase MiaB
Q2RMT0	Rru_A3771	0.00217306	2.56611	0.0754736	2.59671	0.779846	0.941464	0.926336	1.02912	5	PhoH-like protein
Q2RMS9	Rru_A3772	0.170453	1.57617	0.102581	1.58744	0.420058	0.833549	0.764217	0.905586	2	Endoribonuclease YbeY
Q2RMS8	Rru_A3773	0.031364	1.78496	0.124024	1.38303	0.171204	0.827158	0.837964	1.06074	3	CBS domain protein
Q2RMS7	Rru_A3774	#N/A	#N/A	#N/A	#N/A	0.412349	0.777178	#N/A	#N/A	0	Apolipoprotein N-acyltransferase
Q2RMS6	Rru_A3775	0.116914	0.158434	0.464615	0.577658	0.404468	5.77224	0.728028	1.21094	1	Transcriptional regulator, XRE family
Q2RMS5	Rru_A3776	0.00252178	0.575876	0.0802713	0.537722	0.492693	0.860456	0.540105	0.896943	6	S-adenosylmethionine synthase 2
Q2RMS4	Rru_A3777	0.0110694	0.752057	0.0695662	0.582449	0.920936	1.01383	0.307719	1.18844	3	tRNA (guanine-N(7)-)-methyltransferase
Q2RMS3	Rru_A3778	0.0167991	1.36918	0.17938	1.28413	0.258297	0.821787	0.217704	0.897219	4	Ribosome maturation factor RimP
Q2RMS2	Rru_A3779	0.020459	1.44537	0.948111	0.990875	0.0604435	0.757223	0.931485	1.01093	6	NusA antitermination factor
Q2RMS1	Rru_A3780	0.182572	4.44222	0.0239181	13.2882	0.210028	1.3712	0.231083	0.639723	1	LSU ribosomal protein L7AE
Q2RMS0	Rru_A3781	#N/A	#N/A	#N/A	#N/A	#N/A	#N/A	#N/A	#N/A	5	ranslation initiation factor IF-2
Q2RMR9	Rru_A3782	0.0389265	0.779978	0.0305131	0.43583	0.0107066	0.417529	0.131623	0.800489	3	Ribosome-binding factor A
Q2RMR8	Rru_A3783	0.213555	1.10076	0.307346	1.37818	0.0142672	0.645085	0.00211306	0.539195	5	tRNA pseudouridine synthase B
Q2RMR7	Rru_A3784	0.0163739	0.0398718	0.091952	0.0360839	0.194422	0.723228	0.429333	0.735738	2	30S ribosomal protein S15
Q2RMR6	Rru_A3785	#N/A	#N/A	#N/A	#N/A	#N/A	#N/A	#N/A	#N/A	6	olyribonucleotide nucleotidyltransferase
Q2RMR5	Rru_A3786	0.2321	0.867765	0.181845	0.911966	0.0435822	1.21467	0.500651	0.949118	2	Glycerophosphodiester phosphodiesterase
Q2RMR4	Rru_A3787	0.0534578	1.20207	0.0361051	0.691511	0.0717887	0.818446	0.0323518	1.44332	5	2-nitropropane dioxygenase, NPD
Q2RMR1	Rru_A3790	0.0354769	0.748884	0.336237	1.11071	0.000518275	1.87631	0.345787	1.12572	6	Glycolate reductase
Q2RMQ8	Rru_A3793	0.00224813	0.35722	0.27056	0.630364	#N/A	#N/A	0.353909	0.772025	2	Molybdopterin biosynthesis protein
Q2RMQ7	Rru_A3794	0.00298292	1.52589	0.546382	1.07784	0.556429	1.07884	0.00478175	1.51298	6	Cysteine synthase
Q2RMQ6	Rru_A3795	0.000916371	3.5294	0.1549	1.39686	0.0463889	0.692803	0.17994	1.58249	1	Transcriptional regulator, BadM/Rrf2 family
Q2RMQ5	Rru_A3796	0.0231498	1.31646	0.855669	0.977468	0.00209241	0.628559	0.168063	0.900782	4	Phosphopantothenate-cysteine ligas
Q2RMQ4	Rru_A3797	8.00149e-05	4.46404	0.0149803	1.88533	0.0252967	0.708546	0.0856527	1.68353	5	2-octaprenylphenol hydroxylase
Q2RMQ3	Rru_A3798	0.128132	0.852122	0.00736309	0.574176	0.136491	0.74521	0.117278	1.08033	6	Ubiquinone/menaquinone biosynthesis methyltransferase ubiE
Q2RMQ1	Rru_A3800	0.00977654	3.63494	0.16635	2.14411	0.0379346	1.68986	0.281752	2.13125	1	Uncharacterized protein
Q2RMQ0	Rru_A3801	0.575208	0.928816	0.776693	0.970578	0.589923	1.05211	0.626071	0.931096	6	Short chain enoyl-CoA hydratase
Q2RMP9	Rru_A3802	0.20165	2.06044	0.712871	0.823154	0.753157	0.749121	0.402674	1.71717	1	30S ribosomal protein S20
Q2RXD1	Rru_A409	#N/A	#N/A	#N/A	#N/A	#N/A	#N/A	#N/A	#N/A	5	Alanine racemase
Q2RMP8	Rru_B0001	0.269923	0.518019	0.226341	0.447042	0.751081	1.03218	0.546337	1.36853	1	Putative partition protein
Q2RMP6	Rru_B0003	0.36081	1.54394	0.0667633	3.16949	0.294713	1.67135	0.622934	0.709318	1	Glycosyl transferase, group 1
Q2RMP4	Rru_B0005	0.328994	1.18233	0.587851	1.13146	0.349452	1.36971	0.163578	1.1779	5	Glycosyl transferase
Q2RMP3	Rru_B0006	0.0643623	0.632183	0.0319364	0.77583	0.0553824	1.30617	0.892023	1.02051	2	NAD-dependent epimerase/dehydratase
Q2RMP2	Rru_B0007	0.041237	1.55419	0.0730913	1.43018	0.677498	0.972275	0.474438	1.16741	6	Glycosyl transferase, group 1
Q2RMM4	Rru_B0025	0.392087	0.698806	0.804892	0.861848	0.471348	2.02999	0.245951	1.31579	2	Uncharacterized protein
Q2RMM3	Rru_B0026	0.0126912	3.90734	0.0125478	3.33783	0.183612	1.34734	0.0749644	1.78707	5	SapC
Q2RMM1	Rru_B0028	0.00736272	0.628226	0.00123708	0.369431	0.749954	0.902005	0.00760152	1.48508	4	ABC transporter related
Q2RML9	Rru_B0030	0.00538846	2.85779	0.01622	3.07129	0.414346	1.08432	0.877924	0.963371	5	Hemolysin-type calcium-binding region
Q2RML8	Rru_B0031	0.958793	0.971076	0.646602	1.38791	0.256187	2.84014	0.604174	0.844019	1	Uncharacterized protein
Q2RML6	Rru_B0033	0.304979	0.715021	0.18163	0.408605	0.0514363	0.792154	0.501079	1.34399	1	Uncharacterized protein
Q2RML5	Rru_B0034	0.0353418	2.05031	0.689465	1.06589	0.873624	0.969088	0.053634	1.75013	1	Uncharacterized protein
Q2RML3	Rru_B0036	0.00263947	0.26749	0.0426365	0.374653	0.395223	1.71685	0.956251	0.9907	2	Uncharacterized protein
Q2RML2	Rru_B0037	0.000188797	1.72085	0.613529	1.03002	0.0343644	0.636272	0.874842	1.00931	4	Hemolysin-type calcium-binding region
Q2RML1	Rru_B0038	0.165975	1.14096	0.285546	1.14084	0.192708	1.20601	0.792405	1.03086	5	dTDP-4-dehydrorhamnose 3,5-epimerase
Q2RML0	Rru_B0039	0.20043	1.89353	0.0337958	1.89231	0.003676	0.695941	0.39181	1.27341	3	Type I secretion system ATPase, PrtD
Q2RMK9	Rru_B0040	0.00169331	0.161675	0.0525571	0.233675	0.851561	1.08625	0.14211	0.703106	4	Type I secretion membrane fusion protein, HlyD
Q2RMK5	Rru_B0044	0.727114	0.88101	0.586988	0.913894	0.316185	0.791635	0.800311	0.910818	3	Glycosyl transferase, family 2
Q2RMK4	Rru_B0045	0.293612	1.16126	0.00990833	1.52038	0.0327422	1.46682	0.855199	1.01884	5	Phosphomannomutase
Q2RMK3	Rru_B0046	0.00650505	1.66161	0.0378549	1.75204	0.0116444	1.35517	0.530746	1.1636	6	Mannose-1-phosphate guanylyltransferase (GDP)
Q2RMK2	Rru_B0047	0.0129181	2.77738	0.0318627	2.45994	0.795854	1.16302	0.581284	1.30438	1	NAD-dependent epimerase/dehydratase
Q2RMK1	Rru_B0048	0.00755623	1.28104	0.00357586	1.54287	0.00178397	1.76303	0.0385959	1.33845	4	Glucose-1-phosphate thymidylyltransferase
Q2RMK0	Rru_B0049	0.0952732	1.16824	0.250776	1.28765	0.247641	1.21527	0.47274	1.11839	2	dTDP-4-dehydrorhamnose reductase
Q2RMJ9	Rru_B0050	0.0341029	1.34027	0.0177592	1.37626	0.569389	1.08883	0.154715	1.19442	6	dTDP-glucose 4,6-dehydratase

## Sheet: Table S2
Table S2 : Differential expression of enzyme possibly involved in the H2 production
Differential expression of protein in Rhodospirillum rubrum. under propionate condition.
*This fold change is the ratio of abundance of a protein under butyrate condition to the abundance
** The fold change corresponds to the ratio of the abundance of a protein during the assimilation phase of butyrate and its abundance during the propionate assimilation phase in mixture condition.
*** ‘No. identified peptides’ represents the number of identified peptides with a confidence higher than 95%
Uniprot accession number	Locus tag	P-value	Fold change (Butyrate/Mix Butyrate) *	P-value	Fold change (Propionate/Mix propionate) **	No. of identified peptides ***	Description
Mo-Nitrogenase
Q2RVQ1	Rru_A0993	0.218412	2.00401	0.0874063	1.66079	5	Transcriptional regulator, NifA
Q2RVQ0	Rru_A0994	ND	ND	ND	ND	ND	FeMo cofactor biosynthesis protein NifB
Q2RVP9	Rru_A0995	0.590297	1.21041	0.0855383	0.608384	2	4Fe-4S ferredoxin, iron-sulfur binding
Q2RVN6	Rru_A1008	0.833567	1.04613	0.180624	1.42725	2	ADP-ribosyl-(Dinitrogen reductase) hydrolase
Q2RVN5	Rru_A1009	ND	ND	ND	ND	ND	NAD(+)--dinitrogen-reductase
Q2RVN4	Rru_A1010	0.631902	0.863662	0.220196	2.08217	1	Nitrogenase iron protein
Q2RVN3	Rru_A1011	ND	ND	ND	ND	ND	Nitrogenase protein alpha chai
Q2RVN2	Rru_A1012	ND	ND	ND	ND	ND	Nitrogenase molybdenum-iron protein beta chain
Q2RS31	Rru_A2264	0.000912356	0.296548	0.011005	0.319384	5	Ferredoxin
Q2RS30	Rru_A2265	0.319069	0.820019	0.146732	0.736372	5	Electron transfer flavoprotein-ubiquinone oxidoreductase
Q2RS29	Rru_A2266	0.50617	1.17336	0.0609429	1.62898	6	Electron transfer flavoprotein
Q2RS28	Rru_A2267	0.0848112	2.45364	0.0437448	2.43488	5	Electron transfer flavoprotein beta-subunit
Q2RS27	Rru_A2268	ND	ND	ND	ND	ND	Nitrogenase-stabilizing/protective protein NifW Nitrogenase-stabilizing/protective protein NifW
Q2RS26	Rru_A2269	ND	ND	ND	ND	ND	Homocitrate synthase Homocitrate synthase
Q2RS25	Rru_A2270	ND	ND	ND	ND	ND	Nitrogen-fixing NifU-like
Q2RS14	Rru_A2281	ND	ND	ND	ND	ND	NifQ
Q2RS13	Rru_A2282	ND	ND	ND	ND	ND	Ferredoxin III
Q2RS11	Rru_A2284	ND	ND	ND	ND	ND	Dinitrogenase iron-molybdenum cofactor biosynthesis
Q2RS10	Rru_A2285	ND	ND	ND	ND	ND	Nitrogenase iron-molybdenum cofactor biosynthesis protein NifN
Q2RS09	Rru_A2286	ND	ND	ND	ND	ND	Nitrogenase iron-molybdenum cofactor biosynthesis protein NifE
Fe-Nitrogenase
Q2RUK2	Rru_A1392	ND	ND	ND	ND	ND	Nitrogenase
Q2RUK1	Rru_A1393	ND	ND	ND	ND	ND	Nitrogenase component
Q2RUK0	Rru_A1394	ND	ND	ND	ND	ND	Nitrogenase protein alpha chain
Uptake hydrogenase
Q2RV83	Rru_A1161	ND	ND	ND	ND	ND	Ni-Fe hydrogenase, small subunit
Q2RV82	Rru_A1162	0.292283	0.781301	0.11441	1.64786	5	Nickel-dependent hydrogenase, large subunit
Q2RV81	Rru_A1163	ND	ND	ND	ND	ND	Nickel-dependent hydrogenase b-type cytochrome subunit
Q2RV80	Rru_A1164	ND	ND	ND	ND	ND	HyaD peptidase
Q2RV78	Rru_A1166	0.0141674	0.532468	0.0148194	2.41042	3	Hydrogenase expression/formation protein hupH
Q2RV77	Rru_A1167	ND	ND	ND	ND	ND	Putative hydrogenase expression/formation protein HupK
Q2RV76	Rru_A1168	ND	ND	ND	ND	ND	Hydrogenase maturation factor HypA
Q2RV75	Rru_A1169	0.00254749	0.0650071	0.222703	0.350158	1	Hydrogenase accessory protein HypB
CO dehydrogenase
Q2RUH4	Rru_A1420	ND	ND	ND	ND	ND	NADH dehydrogenase
Q2RUH3	Rru_A1421	ND	ND	ND	ND	ND	Membrane bound hydrogenase subunit mbhM
Q2RUH2	Rru_A1422	ND	ND	ND	ND	ND	NADH ubiquinone oxidoreductase, 20 kDa subunit
Q2RUH1	Rru_A1423	ND	ND	ND	ND	ND	4Fe-4S ferredoxin, iron-sulfur binding
Q2RUH0	Rru_A1424	ND	ND	ND	ND	ND	NADH dehydrogenase
Q2RUG9	Rru_A1425	ND	ND	ND	ND	ND	Ech hydrogenase subunit E
Q2RUG8	Rru_A1426	ND	ND	ND	ND	ND	4Fe-4S ferredoxin, iron-sulfur binding
Q2RUG7	Rru_A1427	ND	ND	ND	ND	ND	Carbon monoxide dehydrogenase
Q2RUG6	Rru_A1428	ND	ND	ND	ND	ND	Cobyrinic acid a,c-diamide synthas
Q2RUG5	Rru_A1429	ND	ND	ND	ND	ND	CooT hypothethical protein
Q2RUG4	Rru_A1430	ND	ND	ND	ND	ND	Coohypothethical protein
Q2RUG3	Rru_A1431	ND	ND	ND	ND	ND	CooT hypothethical protein
